# Supplementary material for: Inverting the reactivity of troponoid systems in enantioselective higher-order cycloaddition
Source: Royal Society of Chemistry journal article supplement (doi:10.1039/c9cc05638f), 2019-01-01
Supplement: c9cc05638f1.pdf [file c9cc05638f1.pdf]

## Inverting the reactivity of troponoid system in the higher-order cycloaddition

Sebastian Frankowski<sup>‡</sup>, Anna Skrzyńska<sup>‡</sup> and Łukasz Albrecht<sup>\*</sup>

Institute of Organic Chemistry  
Department of Chemistry,  
Lodz University of Technology  
Zeromskiego 116, 90-924 Łódź, Poland  
e-mail: lukasz.albrecht@p.lodz.pl  
<http://www.a-teamlab.p.lodz.pl>

### Contents

|     |                                                                                                                                                                                                                                                                                                                                                                                                                                                                                                                                                   |          |
|-----|---------------------------------------------------------------------------------------------------------------------------------------------------------------------------------------------------------------------------------------------------------------------------------------------------------------------------------------------------------------------------------------------------------------------------------------------------------------------------------------------------------------------------------------------------|----------|
| 1.  | General methods                                                                                                                                                                                                                                                                                                                                                                                                                                                                                                                                   | page S2  |
| 2.  | Synthesis of trophothione <b>1</b>                                                                                                                                                                                                                                                                                                                                                                                                                                                                                                                | page S3  |
| 3.  | Organocatalytic higher-order cycloaddition in the synthesis of <b>3</b>                                                                                                                                                                                                                                                                                                                                                                                                                                                                           | page S4  |
| 4.  | Enantioselective synthesis of (2 <i>S</i> ,3 <i>R</i> ,3 <i>aS</i> )-2-phenyl-3,3 <i>a</i> -dihydro-2 <i>H</i> -cyclohepta[ <i>b</i> ]thiophene-3-carbaldehyde <b>3a</b> on a 1 g scale                                                                                                                                                                                                                                                                                                                                                           | page S10 |
| 5.  | Hetero-Diels-Alder reaction of <b>3a</b> with electron-poor N=N double bond                                                                                                                                                                                                                                                                                                                                                                                                                                                                       | page S11 |
| 6.  | One-pot synthesis of ( <i>R</i> )-2-phenyl-2 <i>H</i> -cyclohepta[ <i>b</i> ]thiophene-3-carbaldehyde <b>9</b>                                                                                                                                                                                                                                                                                                                                                                                                                                    | page S12 |
| 7.  | Synthesis of ( <i>R</i> )-2-phenyl-2 <i>H</i> -cyclohepta[ <i>b</i> ]thiophene-3-carbaldehyde <b>9</b>                                                                                                                                                                                                                                                                                                                                                                                                                                            | page S13 |
| 8.  | Crystal and X-ray data for (2 <i>S</i> ,3 <i>R</i> ,3 <i>aS</i> )-2-(4-nitrophenyl)-3,3 <i>a</i> -dihydro-2 <i>H</i> -cyclohepta[ <i>b</i> ]thiophene-3-carbaldehyde <b>3d</b><br>Crystal and X ray data for (2 <i>S</i> <sup>*</sup> ,3 <i>R</i> <sup>*</sup> ,3 <i>aS</i> <sup>*</sup> ,6 <i>S</i> <sup>*</sup> ,11 <i>aR</i> <sup>*</sup> )-8,10-dioxo-2,9-diphenyl-3,3 <i>a</i> ,6,8,9,10-hexahydro-2 <i>H</i> -6,11 <i>a</i> -ethenothieno[2,3- <i>c</i> ][1,2,4]triazolo[1,2- <i>a</i> ][1,2]diazepine-3-carbaldehyde <i>rac</i> - <b>6</b> | page S14 |
| 9.  |                                                                                                                                                                                                                                                                                                                                                                                                                                                                                                                                                   | page S15 |
| 10. | NMR data                                                                                                                                                                                                                                                                                                                                                                                                                                                                                                                                          | page S17 |
| 11. | UPC <sup>2</sup> traces                                                                                                                                                                                                                                                                                                                                                                                                                                                                                                                           | page S33 |

## 1. General methods

NMR spectra were acquired on a Bruker Ultra Shield 700 instrument, running at 700 MHz for  $^1\text{H}$  and 176 MHz for  $^{13}\text{C}$ , respectively. Chemical shifts ( $\delta$ ) are reported in ppm relative to residual solvent signals ( $\text{CDCl}_3$ : 7.26 ppm for  $^1\text{H}$  NMR, 77.16 ppm for  $^{13}\text{C}$  NMR). Mass spectra were recorded on a Bruker Maxis Impact spectrometer using electrospray (ES+) ionization (referenced to the mass of the charged species, due to the oxidative conditions of the analysis in the mass spectra of the products **3** only the molecular peaks of the corresponding **9** were observed and therefore are reported). Optical rotations were measured on a Perkin-Elmer 241 polarimeter and  $[\alpha]_{\text{D}}$  values are given in  $\text{deg}\cdot\text{cm}\cdot\text{g}^{-1}\cdot\text{dm}^{-1}$ ; concentration  $c$  is listed in  $\text{g}\cdot(100\text{ mL})^{-1}$ . Analytical thin layer chromatography (TLC) was performed using pre-coated aluminum-backed plates (Merck Kieselgel 60 F254) and visualized by ultraviolet irradiation or Hanessian's stain. The enantiomeric ratio (er) of the products was determined by chiral stationary phase UPC<sup>2</sup> (Daicel Chiralpak IA and IC column). Unless otherwise noted, analytical grade solvents and commercially available reagents were used without further purification. For flash chromatography (FC) silica gel (60, 35-70  $\mu\text{m}$ , Merck KGaA). Aromatic unsaturated aldehydes were obtained using literature procedure.<sup>1</sup>

---

1 N. Daubresse, C. Francesch and C. Rolando, *Tetrahedron*, 1998, **54**, 10761.

## 2. Synthesis of trophothione **1**

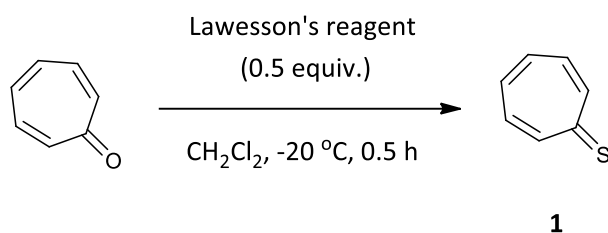

Tropone (212 mg, 195  $\mu\text{L}$ , 2 mmol) was placed in a flame-dried round bottom flask and dry  $\text{CH}_2\text{Cl}_2$  (2 mL) was added. After cooling to  $-20\text{ }^\circ\text{C}$  Lawesson's reagent (202 mg, 1 mmol, 0.5 equiv.) was added in one portion. After stirring for 0.5 h at  $-20\text{ }^\circ\text{C}$ , the reaction mixture was subjected to flash chromatography on silica gel (eluent:  $\text{CH}_2\text{Cl}_2$ ). Fraction containing pure product **1** was evaporated under reduced pressure with ice-cold bath cooling. Pure product **1** was obtained as a red solid (146 mg, 60% yield) and stored as 1.0 M solution in dry  $\text{CH}_2\text{Cl}_2$  at  $-20\text{ }^\circ\text{C}$ . Spectroscopic data were in accordance with those reported in literature<sup>2</sup>.

<sup>2</sup> T. Machiguchi, *Tetrahedron* 1995, **51**, 1133.

### 3. Organocatalytic higher-order cycloaddition in the synthesis of **3**

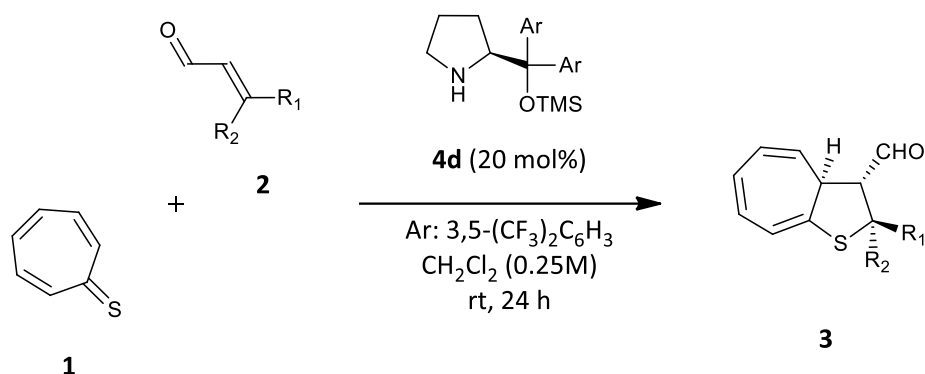

In an ordinary 4 mL glass vial, equipped with a teflon-coated magnetic stirring bar and a screw cap corresponding  $\alpha,\beta$ -unsaturated aldehyde **2** (1.0 equiv., 0.1 mmol), catalyst **4d** (0.2 equiv., 0.02 mmol, 12 mg) were dissolved in  $\text{CH}_2\text{Cl}_2$  (0.25 mL) and 1.0 M solution of tropothione **1** in  $\text{CH}_2\text{Cl}_2$  (0.15 mL, 0.15 mmol) was added. After stirring for 24 h at ambient temperature pure products **3** were isolated by flash chromatography on silica gel (eluent: hexanes:  $\text{CH}_2\text{Cl}_2$  from 80:20 to 70:30).

#### (2*S*,3*R*,3*aS*)-2-Phenyl-3,3*a*-dihydro-2*H*-cyclohepta[*b*]thiophene-3-carbaldehyde **3a**

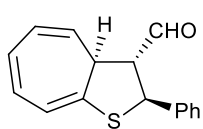

Following the general procedure, **3a** was isolated by FC on silica gel in 80% yield (20.3 mg) as dark red viscous oil (>20:1 dr).  $^1\text{H}$  NMR (700 MHz, Chloroform-*d*)  $\delta$  9.70 (d,  $J$  = 1.9 Hz, 1H), 7.49 – 7.46 (m, 2H), 7.37 – 7.35 (m, 2H), 7.33 – 7.29 (m, 1H), 6.48 (dd,  $J$  = 11.2, 6.4 Hz, 1H), 6.43 (dd,  $J$  = 11.2, 5.8 Hz, 1H), 6.24 (dd,  $J$  = 6.6, 1.7 Hz, 1H), 6.17 (ddd,  $J$  = 9.4, 5.8, 1.7 Hz, 1H), 5.16 (d,  $J$  = 9.4 Hz, 1H), 5.02 (dd,  $J$  = 9.4, 4.3 Hz, 1H), 3.56 (ddd,  $J$  = 9.7, 8.0, 1.9 Hz, 1H), 3.19 – 3.10 (m, 1H).  $^{13}\text{C}$  NMR (176 MHz,  $\text{CDCl}_3$ )  $\delta$  199.2, 137.4, 137.0, 130.5, 129.1 (2C), 128.6, 128.2, 128.1 (2C), 127.4, 124.7, 116.1, 69.6, 54.6, 48.6. HRMS calculated for  $[\text{C}_{16}\text{H}_{12}\text{OS}+\text{H}^+]$ : 253.0682; found: 253.0685.  $[\alpha]_{\text{D}}^{22} = 34.5^\circ$  ( $c$  = 1.0,  $\text{CHCl}_3$ ). The er was determined by UPC<sup>2</sup> using a chiral Chiralpack IG column gradient from 100%  $\text{CO}_2$  up to 40%; *i*-PrOH, 2.5 mL/min; detection wavelength = 260 nm;  $\tau_{\text{major}} = 2.95$  min,  $\tau_{\text{minor}} = 2.82$  min, (>99:1 er).

#### (2*S*,3*R*,3*aS*)-2-(*p*-Tolyl)-3,3*a*-dihydro-2*H*-cyclohepta[*b*]thiophene-3-carbaldehyde **3b**

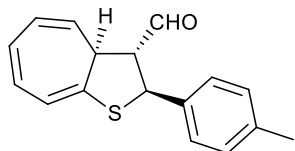

Following the general procedure, **3b** was isolated by FC on silica gel in 60% yield (16.1 mg) as dark red viscous oil (>20:1 dr).  $^1\text{H}$  NMR (700 MHz, Chloroform-*d*)  $\delta$  9.69 (d,  $J$  = 2.0 Hz, 1H), 7.38 – 7.34 (m, 2H), 7.17 – 7.16 (m, 2H), 6.47 (dd,  $J$  = 11.2, 6.5 Hz, 1H), 6.42 (dd,  $J$  = 11.1, 5.7 Hz, 1H), 6.23 (dd,  $J$  = 6.5, 1.7 Hz, 1H), 6.16 (ddd,  $J$  = 9.5, 5.7, 1.7 Hz, 1H), 5.12 (d,  $J$  = 9.6 Hz, 1H), 5.02 (dd,  $J$  = 9.4, 4.2 Hz, 1H), 3.54 (ddd,  $J$  = 9.9, 8.1, 2.0 Hz, 1H), 3.14 (ddt,  $J$  = 8.0, 3.9, 1.8 Hz, 1H), 2.34 (s, 3H).  $^{13}\text{C}$  NMR (176 MHz,  $\text{CDCl}_3$ )  $\delta$  199.4, 138.4, 137.6, 133.8, 130.4, 129.8 (2C), 128.2, 127.9 (2C), 127.4, 124.8, 116.0, 69.6, 54.5, 48.6, 21.3. HRMS calculated for  $[\text{C}_{17}\text{H}_{14}\text{OS}+\text{H}^+]$ : 267.0838; found: 267.0840.  $[\alpha]_{\text{D}}^{23} = 26.4^\circ$  ( $c$  = 1.0,  $\text{CHCl}_3$ ). The er was determined by UPC<sup>2</sup> using a chiral Chiralpack IG column gradient from 100%  $\text{CO}_2$  up to

40%; *i*-PrOH, 2.5 mL/min; detection wavelength = 334 nm;  $\tau_{\text{major}} = 3.14$  min,  $\tau_{\text{minor}} = 2.92$  min, (>99:1 er).

**(2*S*,3*R*,3*aS*)-2-(4-Methoxyphenyl)-3,3*a*-dihydro-2*H*-cyclohepta[*b*]thiophene-3-carbaldehyde **3c****

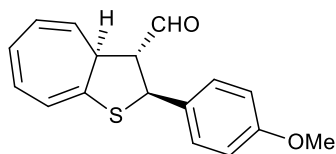

Following the general procedure, **3c** was isolated by FC on silica gel in 88% yield (25.0 mg) as dark red viscous oil (>20:1 dr).  $^1\text{H}$  NMR (700 MHz, Chloroform-*d*)  $\delta$  9.68 (d,  $J = 2.0$  Hz, 1H), 7.41 – 7.36 (m, 2H), 6.90 – 6.87 (m, 2H), 6.46 (dd,  $J = 11.1, 6.4$  Hz, 1H), 6.42 (dd,  $J = 11.1, 5.7$  Hz, 1H), 6.23 (dd,  $J = 6.5, 1.7$  Hz, 1H), 6.18 – 6.14 (m, 1H), 5.11 (d,  $J = 9.7$  Hz, 1H), 5.02 (dd,  $J = 9.4, 4.2$  Hz, 1H), 3.80 (s, 3H), 3.52 (ddd,  $J = 10.0, 8.0, 2.1$  Hz, 1H), 3.14 (ddt,  $J = 8.0, 3.9, 1.8$  Hz, 1H).  $^{13}\text{C}$  NMR (176 MHz,  $\text{CDCl}_3$ )  $\delta$  199.4, 159.8, 137.6, 130.4, 129.2 (2C), 128.6, 128.2, 127.4, 124.8, 116.1, 114.5 (2C), 69.7, 55.5, 54.2, 48.5. HRMS calculated for  $[\text{C}_{17}\text{H}_{14}\text{O}_2\text{S}+\text{H}^+]$ : 283.0787; found: 283.0789.  $[\alpha]_{\text{D}}^{22} = 57.3^\circ$  ( $c = 1.0$ ,  $\text{CHCl}_3$ ). The er was determined by UPC<sup>2</sup> using a chiral Chiralpack IG column gradient from 100%  $\text{CO}_2$  up to 40%; *i*-PrOH, 2.5 mL/min; detection wavelength = 325 nm;  $\tau_{\text{major}} = 3.53$  min,  $\tau_{\text{minor}} = 3.36$  min, (>99:1 er).

**(2*S*,3*R*,3*aS*)-2-(4-Nitrophenyl)-3,3*a*-dihydro-2*H*-cyclohepta[*b*]thiophene-3-carbaldehyde **3d****

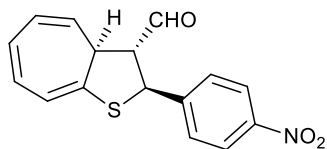

Following the general procedure, **3d** was isolated by FC on silica gel in 72% yield (21.5 mg) as yellow crystal solid (tt. = 123–124°C) (>20:1 dr).  $^1\text{H}$  NMR (700 MHz, Chloroform-*d*)  $\delta$  9.73 (d,  $J = 1.4$  Hz, 1H), 8.23–8.20 (m, 2H), 7.68–7.65 (m, 2H), 6.54 – 6.50 (m, 1H), 6.46 (dd,  $J = 11.1, 5.8$  Hz, 1H), 6.26 (dd,  $J = 6.6, 1.6$  Hz, 1H), 6.19 (ddd,  $J = 9.3, 5.8, 1.7$  Hz, 1H), 5.27 (d,  $J = 8.5$  Hz, 1H), 5.01 (dd,  $J = 9.3, 4.4$  Hz, 1H), 3.53 (ddd,  $J = 8.6, 7.4, 1.4$  Hz, 1H), 3.14 (ddt,  $J = 7.6, 4.4, 1.7$  Hz, 1H).  $^{13}\text{C}$  NMR (176 MHz,  $\text{CDCl}_3$ )  $\delta$  198.3, 147.9, 145.0, 135.9, 130.8, 129.2 (2C), 128.6, 127.8, 124.3 (2C), 124.2, 116.5, 69.4, 53.2, 48.6. HRMS calculated for  $[\text{C}_{16}\text{H}_{11}\text{O}_3\text{S}+\text{H}^+]$ : 297.0460; found: 297.0462.  $[\alpha]_{\text{D}}^{22} = 176.0^\circ$  ( $c = 1.0$ ,  $\text{CHCl}_3$ ). The er was determined by UPC<sup>2</sup> using a chiral Chiralpack IG column gradient from 100%  $\text{CO}_2$  up to 40%; *i*-PrOH, 2.5 mL/min; detection wavelength = 290 nm;  $\tau_{\text{major}} = 4.06$  min,  $\tau_{\text{minor}} = 3.69$  min, (>99:1 er).

**(2*S*,3*R*,3*aS*)-2-(4-Chlorophenyl)-3,3*a*-dihydro-2*H*-cyclohepta[*b*]thiophene-3-carbaldehyde **3e****

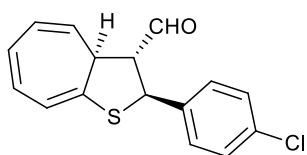

Following the general procedure, **3e** was isolated by FC on silica gel in 70% yield (20.2 mg) as dark red viscous oil (>20:1 dr).  $^1\text{H}$  NMR (700 MHz, Chloroform-*d*)  $\delta$  9.70 (d,  $J = 1.8$  Hz, 1H), 7.42 – 7.40 (m, 2H), 7.34 – 7.31 (m, 2H), 6.48 (dd,  $J = 11.1, 6.4$  Hz, 1H), 6.43 (dd,  $J = 11.1, 5.8$  Hz, 1H), 6.25 – 6.22 (m, 1H), 6.17 (ddd,  $J = 9.4, 5.8, 1.7$  Hz, 1H), 5.13 (d,  $J = 9.1$  Hz, 1H), 5.01

(dd,  $J = 9.4, 4.3$  Hz, 1H), 3.49 (ddd,  $J = 9.4, 7.8, 1.8$  Hz, 1H), 3.12 (ddt,  $J = 7.9, 3.9, 1.8$  Hz, 1H).  $^{13}\text{C}$  NMR (176 MHz,  $\text{CDCl}_3$ )  $\delta$  198.9, 136.8, 135.7, 134.3, 130.6, 129.5 (2C), 129.3 (2C), 128.4, 127.5, 124.5, 116.2, 69.6, 53.7, 48.6. HRMS calculated for  $[\text{C}_{16}\text{H}_{11}\text{ClOS}+\text{H}^+]$ : 287.0292; found: 287.0289.  $[\alpha]_{\text{D}}^{22} = 23.6^\circ$  ( $c = 1.0$ ,  $\text{CHCl}_3$ ). The er was determined by UPC<sup>2</sup> using a chiral Chiralpack IG column gradient from 100%  $\text{CO}_2$  up to 40%; *i*-PrOH, 2.5 mL/min; detection wavelength = 343 nm;  $\tau_{\text{major}} = 3.31$  min,  $\tau_{\text{minor}} = 3.02$  min, (>99:1 er).

**(2*S*,3*R*,3*aS*)-2-(3-Chlorophenyl)-3,3*a*-dihydro-2*H*-cyclohepta[*b*]thiophene-3-carbaldehyde**  
**3f**

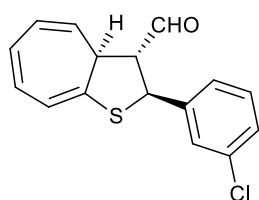

Following the general procedure, **3f** was isolated by FC on silica gel in 63% yield (18.1 mg) as dark red viscous oil (>20:1 dr).  $^1\text{H}$  NMR (700 MHz, Chloroform-*d*)  $\delta$  9.71 (d,  $J = 1.8$  Hz, 1H), 7.48–7.47 (m, 1H), 7.37–7.34 (m, 1H), 7.29–7.28 (m, 2H), 6.51–6.47 (m, 1H), 6.44 (dd,  $J = 11.1, 5.7$  Hz, 1H), 6.24 (dd,  $J = 6.5, 1.6$  Hz, 1H), 6.18 (ddd,  $J = 9.4, 5.7, 1.7$  Hz, 1H), 5.12 (d,  $J = 9.3$  Hz, 1H), 5.02 (dd,  $J = 9.4, 4.3$  Hz, 1H), 3.52 (ddd,  $J = 9.4, 7.8, 1.8$  Hz, 1H), 3.12 (ddt,  $J = 7.8, 4.4, 1.8$  Hz, 1H).  $^{13}\text{C}$  NMR (176 MHz,  $\text{CDCl}_3$ )  $\delta$  198.8, 139.3, 136.7, 135.0, 130.6, 130.3, 128.8, 128.4, 128.2, 127.5, 126.4, 124.5, 116.3, 69.5, 53.8, 48.6. HRMS calculated for  $[\text{C}_{16}\text{H}_{11}\text{ClOS}+\text{H}^+]$ : 287.0292; found: 287.0295.  $[\alpha]_{\text{D}}^{22} = 59.9^\circ$  ( $c = 1.0$ ,  $\text{CHCl}_3$ ). The er was determined by UPC<sup>2</sup> using a chiral Chiralpack IB column gradient from 100%  $\text{CO}_2$  up to 40%; *i*-PrOH, 2.5 mL/min; detection wavelength = 326 nm;  $\tau_{\text{major}} = 2.66$  min,  $\tau_{\text{minor}} = 2.81$  min, (98:2 er)

**(2*S*,3*R*,3*aS*)-2-(2-Chlorophenyl)-3,3*a*-dihydro-2*H*-cyclohepta[*b*]thiophene-3-carbaldehyde**  
**3g**

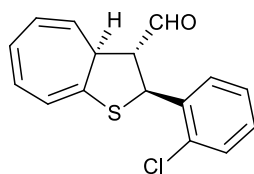

Following the general procedure, **3g** was isolated by FC on silica gel in 67% yield (19.3 mg) as dark red viscous oil (>20:1 dr).  $^1\text{H}$  NMR (700 MHz, Chloroform-*d*)  $\delta$  9.73 (d,  $J = 1.7$  Hz, 1H), 7.70–7.69 (m, 1H), 7.42–7.40 (m, 1H), 7.29–7.26 (m, 1H), 7.26–7.23 (m, 1H), 6.53 (ddd,  $J = 11.1, 6.4, 0.8$  Hz, 1H), 6.42 (dd,  $J = 11.1, 5.8$  Hz, 1H), 6.25 (dd,  $J = 6.4, 1.6$  Hz, 1H), 6.10 (ddd,  $J = 9.4, 5.8, 1.7$  Hz, 1H), 5.67 (d,  $J = 6.5$  Hz, 1H), 4.79 (dd,  $J = 9.3, 4.6$  Hz, 1H), 3.48 (ddd,  $J = 6.8, 5.4, 1.7$  Hz, 1H), 3.19 (ddt,  $J = 5.0, 3.4, 1.7$  Hz, 1H).  $^{13}\text{C}$  NMR (176 MHz,  $\text{CDCl}_3$ )  $\delta$  198.5, 137.3, 135.1, 133.8, 131.1, 130.1, 129.6, 129.5, 128.1, 127.5, 127.1, 124.5, 116.0, 68.1, 50.6, 47.6. HRMS calculated for  $[\text{C}_{16}\text{H}_{11}\text{ClOS}+\text{H}^+]$ : 287.0292; found: 287.0295.  $[\alpha]_{\text{D}}^{22} = 41.8^\circ$  ( $c = 1.0$ ,  $\text{CHCl}_3$ ). The er was determined by UPC<sup>2</sup> using a chiral Chiralpack IG column gradient from 100%  $\text{CO}_2$  up to 40%; *i*-PrOH, 2.5 mL/min; detection wavelength = 341 nm;  $\tau_{\text{major}} = 2.81$  min,  $\tau_{\text{minor}} = 2.92$  min, (98:2 er)

**(2*S*,3*R*,3*aS*)-2-(Naphthalen-1-yl)-3,3*a*-dihydro-2*H*-cyclohepta[*b*]thiophene-3-carbaldehyde 3h**

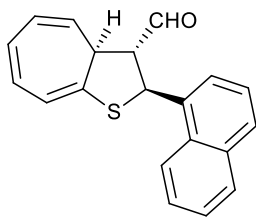

Following the general procedure, **3h** was isolated by FC on silica gel in 65% yield (19.8 mg) as dark red viscous oil (>20:1 dr). <sup>1</sup>H NMR (700 MHz, Chloroform-*d*) δ 9.75 (d, *J* = 1.7 Hz, 1H), 8.22 – 8.20 (m, 1H), 7.93 – 7.88 (m, 1H), 7.85 – 7.80 (m, 2H), 7.61 – 7.59 (m, 1H), 7.55 – 7.53 (m, 1H), 7.47 – 7.45 (m, 1H), 6.56 (ddd, *J* = 11.1, 6.5, 0.8 Hz, 1H), 6.44 (dd, *J* = 11.1, 5.8 Hz, 1H), 6.30 (dd, *J* = 6.5, 1.7 Hz, 1H), 6.12 (ddd, *J* = 9.4, 5.8, 1.7 Hz, 1H), 6.01 (d, *J* = 7.0 Hz, 1H), 4.84 (dd, *J* = 9.3, 4.6 Hz, 1H), 3.77 (ddd, *J* = 7.2, 5.8, 1.7 Hz, 1H), 3.23 (ddt, *J* = 6.1, 4.5, 1.7 Hz, 1H). <sup>13</sup>C NMR (176 MHz, CDCl<sub>3</sub>) δ 199.7, 137.6, 134.2, 132.5, 131.3, 131.0, 129.3, 129.1, 128.0, 127.0, 126.9, 126.1, 125.6, 125.5, 124.7, 122.9, 115.9, 67.3, 50.3, 48.3. HRMS calculated for [C<sub>20</sub>H<sub>14</sub>OS+H<sup>+</sup>]: 303.0838; found: 303.0840. [α]<sub>D</sub><sup>22</sup> = 65.3° (*c* = 1.0, CHCl<sub>3</sub>). The er was determined by UPC<sup>2</sup> using a chiral Chiralpack IG column gradient from 100% CO<sub>2</sub> up to 40%; *i*-PrOH, 2.5 mL/min; detection wavelength = 350 nm; τ<sub>major</sub> = 3.69 min, τ<sub>minor</sub> = 3.59 min, (>99:1 er).

**(2*S*,3*R*,3*aS*)-2-(Furan-2-yl)-3,3*a*-dihydro-2*H*-cyclohepta[*b*]thiophene-3-carbaldehyde 3i**

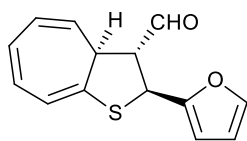

Following the general procedure, **3i** was isolated by FC on silica gel in 64% yield (15.6 mg) as dark red viscous oil (>20:1 dr). <sup>1</sup>H NMR (700 MHz, CDCl<sub>3</sub>) δ 9.73 (d, *J* = 1.5 Hz, 1H), 7.40 – 7.39 (m, 1H), 6.49 (ddd, *J* = 11.1, 6.5, 0.8 Hz, 1H), 6.42 (dd, *J* = 11.1, 5.8 Hz, 1H), 6.36 (dt, *J* = 3.3, 0.8 Hz, 1H), 6.33 (dd, *J* = 3.3, 1.9 Hz, 1H), 6.19 (dd, *J* = 6.3, 1.6 Hz, 1H), 6.14 (ddd, *J* = 9.4, 5.9, 1.7 Hz, 1H), 5.26 (dd, *J* = 7.6, 0.8 Hz, 1H), 4.99 (dd, *J* = 9.3, 4.6 Hz, 1H), 3.73 (ddd, *J* = 7.7, 6.4, 1.5 Hz, 1H), 3.11 (ddt, *J* = 6.3, 4.6, 1.7 Hz, 1H). <sup>13</sup>C NMR (176 MHz, CDCl<sub>3</sub>) δ 198.8, 150.6, 143.0, 136.3, 130.8, 128.2, 127.1, 124.3, 116.0, 110.9, 108.4, 65.5, 47.9, 46.9. HRMS calculated for [C<sub>14</sub>H<sub>10</sub>O<sub>2</sub>S+H<sup>+</sup>]: 243.0474; found: 243.0480. [α]<sub>D</sub><sup>23</sup> = 168.8° (*c* = 1.0, CHCl<sub>3</sub>). The er was determined by UPC<sup>2</sup> using a chiral Chiralpack IG column gradient from 100% CO<sub>2</sub> up to 40%; *i*-PrOH, 2.5 mL/min; detection wavelength = 265 nm; τ<sub>major</sub> = 2.74 min, τ<sub>minor</sub> = 2.53 min, (98:2 er).

**(2*R*,3*R*,3*aS*)-2-Propyl-3,3*a*-dihydro-2*H*-cyclohepta[*b*]thiophene-3-carbaldehyde 3j**

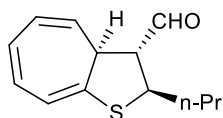

Following the general procedure, **3j** was isolated by FC on silica gel in 65% yield (14.3 mg) as dark red viscous oil (12:1 dr). <sup>1</sup>H NMR (700 MHz, Chloroform-*d*) δ 9.69 (d, *J* = 1.9 Hz, 1H), 6.46 (dd, *J* = 11.1, 6.5 Hz, 1H), 6.38 (dd, *J* = 11.1, 5.8 Hz, 1H), 6.17 – 6.13 (m, 2H), 5.06 (dd, *J* = 9.4, 3.8 Hz, 1H), 4.05 – 4.02 (m, 1H), 3.09 – 3.06 (m, 2H), 1.87 (dddd, *J* = 14.1, 10.3, 6.2, 4.4 Hz, 1H), 1.70 (dtd, *J* = 13.5, 9.9, 5.0 Hz, 1H), 1.49 – 1.36 (m, 2H), 0.95 (t, *J* = 7.4 Hz, 3H). <sup>13</sup>C NMR (176 MHz, CDCl<sub>3</sub>) δ 200.2, 137.6, 131.1, 127.7, 127.3, 124.3, 115.9, 67.2, 51.6, 48.5, 36.6, 22.5, 13.9. HRMS calculated for [C<sub>13</sub>H<sub>14</sub>OS+H<sup>+</sup>]: 219.0838; found: 219.0841. [α]<sub>D</sub><sup>22</sup> = 76.7° (*c* = 1.0, CHCl<sub>3</sub>). The er was determined by UPC<sup>2</sup> using a chiral Chiralpack IG column gradient from 100% CO<sub>2</sub> up to 40%; *i*-

PrOH, 2.5 mL/min; detection wavelength = 350 nm;  $\tau_{\text{major}} = 2.87$  min,  $\tau_{\text{minor}} = 2.08$  min, (98.5:1.5 er).

**(2*R*,3*R*,3*aS*)-2-Hexyl-3,3*a*-dihydro-2*H*-cyclohepta[*b*]thiophene-3-carbaldehyde 3k**

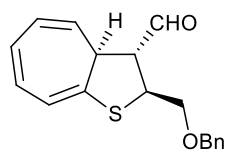

Following the general procedure, **3k** was isolated by FC on silica gel in 63% yield (16.5 mg) as dark red viscous oil (17:1:1 dr).  $^1\text{H}$  NMR (700 MHz, Chloroform-*d*)  $\delta$  9.69 (d,  $J = 1.9$  Hz, 1H), 6.46 (dd,  $J = 11.1, 6.5$  Hz, 1H), 6.38 (dd,  $J = 11.1, 5.8$  Hz, 1H), 6.17 – 6.13 (m, 2H), 5.05 (dd,  $J = 9.4, 3.7$  Hz, 1H), 4.02 (ddd,  $J = 10.0, 6.7, 4.5$  Hz, 1H), 3.10 – 3.06 (m, 2H), 1.92 – 1.85 (m, 1H), 1.73 – 1.67 (m, 1H), 1.41 – 1.25 (m, 8H), 0.88 (t,  $J = 6.9$  Hz, 3H).  $^{13}\text{C}$  NMR (176 MHz,  $\text{CDCl}_3$ )  $\delta$  200.2, 137.6, 131.1, 127.7, 127.3, 124.3, 115.9, 67.2, 51.9, 48.5, 34.5, 31.7, 29.2, 29.1, 22.7, 14.2. HRMS calculated for  $[\text{C}_{16}\text{H}_{20}\text{OS}+\text{H}^+]$ : 261.1308; found: 261.1310.  $[\alpha]_{\text{D}}^{22} = 66.2^\circ$  ( $c = 1.0$ ,  $\text{CHCl}_3$ ). The er was determined by UPC<sup>2</sup> using a chiral Chiralpack IG column gradient from 100%  $\text{CO}_2$  up to 40%; *i*-PrOH, 2.5 mL/min; detection wavelength = 352 nm;  $\tau_{\text{major}} = 3.12$  min,  $\tau_{\text{minor}} = 2.36$  min, (98:2 er).

**(2*S*,3*R*,3*aS*)-2-((Benzyloxy)methyl)-3,3*a*-dihydro-2*H*-cyclohepta[*b*]thiophene-3-carbaldehyde 3l**

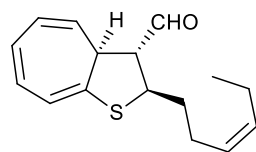

Following the general procedure, **3l** was isolated by FC on silica gel in 65% yield (19.4 mg) as dark red viscous oil (13:1 dr).  $^1\text{H}$  NMR (700 MHz, Chloroform-*d*)  $\delta$  9.67 (d,  $J = 1.3$  Hz, 1H), 7.39 – 7.30 (m, 5H), 6.50 – 6.46 (m, 1H), 6.38 (dd,  $J = 11.1, 5.8$  Hz, 1H), 6.14 – 6.12 (m, 1H), 6.10 (ddd,  $J = 9.4, 5.8, 1.7$  Hz, 1H), 4.96 (dd,  $J = 9.4, 4.8$  Hz, 1H), 4.60 (d,  $J = 12.0$  Hz, 1H), 4.54 (d,  $J = 12.0$  Hz, 1H), 4.28 (ddd,  $J = 8.8, 6.3, 4.8$  Hz, 1H), 3.68 (dd,  $J = 9.7, 6.3$  Hz, 1H), 3.63 (dd,  $J = 9.7, 8.8$  Hz, 1H), 3.41 (td,  $J = 4.6, 1.3$  Hz, 1H), 3.15 (tt,  $J = 4.6, 1.7$  Hz, 1H).  $^{13}\text{C}$  NMR (176 MHz,  $\text{CDCl}_3$ )  $\delta$  199.7, 137.6, 137.0, 131.5, 128.7 (2C), 128.2, 128.1 (2C), 127.7, 127.2, 124.1, 115.9, 73.4, 70.6, 62.6, 49.6, 47.2. HRMS calculated for  $[\text{C}_{18}\text{H}_{16}\text{O}_2\text{S}+\text{H}^+]$ : 296.0944; found: 297.0947.  $[\alpha]_{\text{D}}^{23} = 72.8^\circ$  ( $c = 1.0$ ,  $\text{CHCl}_3$ ). The er was determined by UPC<sup>2</sup> using a chiral Chiralpack IG column gradient from 100%  $\text{CO}_2$  up to 40%; *i*-PrOH, 2.5 mL/min; detection wavelength = 344 nm;  $\tau_{\text{major}} = 3.39$  min,  $\tau_{\text{minor}} = 3.08$  min, (98.5:1.5er)

**(2*R*,3*R*,3*aS*)-2-((*Z*)-Hex-3-en-1-yl)-3,3*a*-dihydro-2*H*-cyclohepta[*b*]thiophene-3-carbaldehyde 3m**

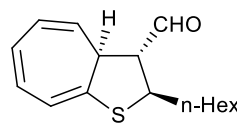

Following the general procedure, **3m** was isolated by FC on silica gel in 67% yield (17.4 mg) as dark red viscous oil (20:1 dr).  $^1\text{H}$  NMR (700 MHz, Chloroform-*d*)  $\delta$  9.68 (d,  $J = 1.7$  Hz, 1H), 6.49 – 6.45 (m, 1H), 6.40 – 6.37 (m, 1H), 6.18 – 6.13 (m, 2H), 5.46 – 5.42 (m, 1H), 5.31 – 5.27 (m, 1H), 5.08 – 5.05 (m, 1H), 4.06 – 4.02 (m, 1H), 3.10 – 3.07 (m, 2H), 2.18 – 2.13 (m, 2H), 2.07 – 2.03 (m, 2H), 1.96 – 1.91 (m, 1H), 1.82 – 1.77 (m, 1H), 0.97 (t,  $J = 7.5$  Hz, 3H).  $^{13}\text{C}$  NMR (176 MHz,  $\text{CDCl}_3$ )  $\delta$  200.1, 137.4,

133.6, 131.2, 127.6, 127.3, 127.0, 124.3, 115.8, 66.9, 51.1, 48.3, 34.5, 26.6, 20.8, 14.4. HRMS calculated for  $[C_{16}H_{18}OS+H^+]$ : 259.1151; found: 259.1158.  $[\alpha]_D^{22} = 71.1^\circ$  ( $c = 1.0$ ,  $CHCl_3$ ). The er was determined by UPC<sup>2</sup> using a chiral Chiralpack IG column gradient from 100%  $CO_2$  up to 40%;  $i$ -PrOH, 2.5 mL/min; detection wavelength = 299 nm;  $\tau_{major} = 3.13$  min,  $\tau_{minor} = 2.27$  min, (98.5:1.5 er).

**(2*R*,3*R*,3*a**S*)-2-Methyl-2-(5-methylhex-4-en-1-yl)-3,3*a*-dihydro-2*H*-cyclohepta[*b*]thiophene-3-carbaldehyde 3n**

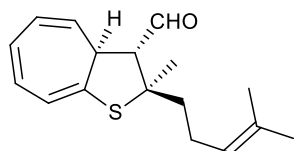

Following the general procedure, **3n** was isolated by FC on silica gel in 67% yield (18.4 mg) as dark red viscous oil (3.5:1 dr). Major diastereoisomer:  $^1H$  NMR (700 MHz, Chloroform-*d*)  $\delta$  9.82 (d,  $J = 2.4$  Hz, 1H), 6.47 – 6.36 (m, 2H), 6.24 (dd,  $J = 6.6, 1.8$  Hz, 1H), 6.15 (ddd,  $J = 9.7, 5.8, 1.9$  Hz, 1H), 5.12 (dddd,  $J = 7.1, 5.7, 3.0, 1.5$  Hz, 1H), 4.92 (dd,  $J = 9.5, 4.0$  Hz, 1H), 3.28 (ddt,  $J = 9.5, 3.8, 1.8$  Hz, 1H), 3.20 (dd,  $J = 9.4, 2.4$  Hz, 1H), 2.28 – 2.21 (m, 1H), 2.08 (ddd,  $J = 19.3, 12.5, 6.2$  Hz, 1H), 2.02 (ddd,  $J = 13.8, 11.0, 4.8$  Hz, 1H), 1.95 (ddd,  $J = 13.8, 11.2, 5.4$  Hz, 1H), 1.70 (s, 3H), 1.63 (s, 3H), 1.53 (s, 3H).  $^{13}C$  NMR (176 MHz,  $CDCl_3$ )  $\delta$  200.6, 137.1, 132.9, 130.1, 127.9, 127.2, 124.2, 123.2, 117.6, 70.9, 61.9, 47.3, 40.7, 25.8, 25.2, 24.9, 17.9. Minor diastereoisomer:  $^1H$  NMR (700 MHz, Chloroform-*d*)  $\delta$  9.88 (d,  $J = 2.2$  Hz, 1H), 6.46 – 6.37 (m, 2H, overlapping with major diastereoisomer), 6.22 (dd,  $J = 6.4, 1.7$  Hz, 1H), 6.15 (ddt,  $J = 9.0, 5.0, 2.3$  Hz, 1H, overlapping with major diastereoisomer), 5.09 (ddq,  $J = 8.6, 5.7, 1.5$  Hz, 1H), 4.91 (ddd,  $J = 9.9, 5.9, 4.1$  Hz, 1H, overlapping with major diastereoisomer), 3.26 (dd,  $J = 3.9, 1.9$  Hz, 1H), 3.20 (dd,  $J = 9.4, 2.4$  Hz, 1H, overlapping with major diastereoisomer), 2.28 – 2.21 (m, 1H, overlapping with major diastereoisomer), 2.08 (ddd,  $J = 19.3, 12.5, 6.2$  Hz, 1H, overlapping with major diastereoisomer), 2.02 (ddd,  $J = 13.8, 11.0, 4.8$  Hz, 1H, overlapping with major diastereoisomer), 1.95 (ddd,  $J = 13.8, 11.2, 5.4$  Hz, 1H, overlapping with major diastereoisomer), 1.67 (s, 3H), 1.66 (s, 3H), 1.61 (s, 3H).  $^{13}C$  NMR (176 MHz,  $CDCl_3$ )  $\delta$  200.3, 137.2, 132.7, 130.1 (overlapping with major diastereoisomer), 127.9, 127.1, 124.7, 123.4, 117.2, 77.2, 73.0, 62.0, 47.6, 38.5, 29.9, 25.8, 25.8, 24.7, 24.3, 17.8. HRMS calculated for  $[C_{17}H_{20}OS+H^+]$ : 273.1308; found: 273.1313.  $[\alpha]_D^{22} = 73.5^\circ$  ( $c = 1.0$ ,  $CHCl_3$ ). The er was determined by UPC<sup>2</sup> using a chiral Chiralpack IA column gradient from 100%  $CO_2$  up to 40%;  $i$ -PrOH, 2.5 mL/min; detection wavelength = 354 nm;  $\tau_{major} = 2.36$  min,  $\tau_{minor} = 1.94$  min, (98:2 er).

**4. Enantioselective synthesis of (2*S*,3*R*,3*aS*)-2-phenyl-3,3*a*-dihydro-2*H*-cyclohepta[*b*]thiophene-3-carbaldehyde **3a** on a 1 g scale**

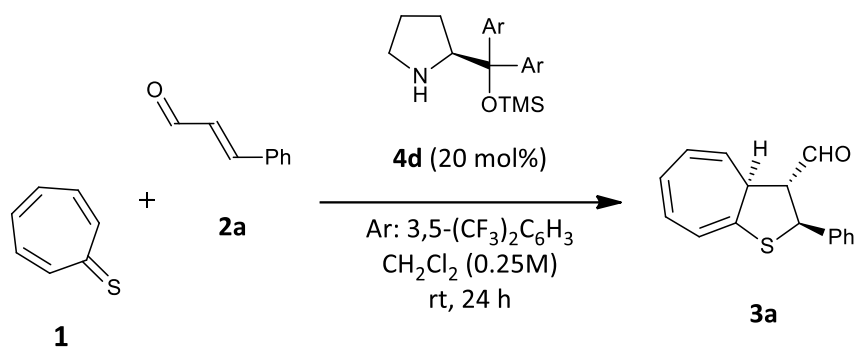

In a round-bottom flask equipped with a magnetic stirring bar, aldehyde **2a** (1 equiv., 7.58 mmol, 1.00 g), catalyst **4d** (0.2 equiv., 1.52 mmol, 0.905 g) were dissolved in  $\text{CH}_2\text{Cl}_2$  (19 mL). Subsequently, 1.0 M solution of tropothione **1** in  $\text{CH}_2\text{Cl}_2$  (11.4 mL, 11.4 mmol) was added and the reaction mixture was stirred for 24 h at ambient temperature. Crude product **3a** was purified by the flash chromatography on silica gel (eluent: hexanes:  $\text{CH}_2\text{Cl}_2$  from 80:20 to 70:30) to afford **3a** in 78% yield (1.500 g, >20:1 dr) as a dark red viscous oil. NMR and HPLC data were in accordance with previously obtained results.

## 5. Hetero-Diels-Alder reaction of **3a** with electron-poor N=N double bond

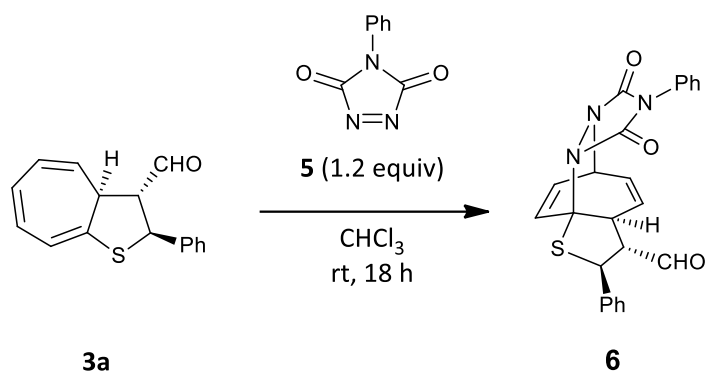

In an ordinary 4 mL glass vial, equipped with a Teflon-coated magnetic stirring bar and a screw cap **3a** (25.4 mg, 0.1 mmol, 1.0 equiv.) was dissolved in  $\text{CHCl}_3$  (1 mL) and 4-phenyl-1,2,4-triazoline-3,5-dione **5** (21.0 mg, 0.12 mmol, 1.2 equiv.) was added in one portion. After stirring at ambient temperature for 18 h crude reaction mixture was directly subjected to flash chromatography (eluent:  $\text{Et}_2\text{O}$  : hexanes 8:2). Product **6** was obtained as white crystals in 90% yield (38.7 mg). **(2S,3R,3aS,6S,11aR)-8,10-Dioxo-2,9-diphenyl-3,3a,6,8,9,10-hexahydro-2H-6,11a-ethenothieno[2,3-c][1,2,4]triazolo[1,2-a][1,2]diazepine-3-carbaldehyde 6**  $^1\text{H}$  NMR (700 MHz, Chloroform-*d*)  $\delta$  9.61 (d,  $J$  = 1.8 Hz, 1H), 7.85 – 7.80 (m, 2H), 7.55 – 7.53 (m, 2H), 7.48 – 7.50 (m, 2H), 7.42 – 7.39 (m, 1H), 7.37 – 7.33 (m, 2H), 7.32 – 7.28 (m, 1H), 6.65 (dd,  $J$  = 8.9, 7.1 Hz, 1H), 6.56 (dd,  $J$  = 8.9, 1.0 Hz, 1H), 6.01 (ddd,  $J$  = 11.2, 7.3, 2.9 Hz, 1H), 5.87 – 5.77 (m, 1H), 5.15 – 5.07 (m, 1H), 4.80 (d,  $J$  = 11.2 Hz, 1H), 4.13 (ddd,  $J$  = 12.8, 11.2, 1.8 Hz, 1H), 3.54 (dt,  $J$  = 12.6, 2.5 Hz, 1H).  $^{13}\text{C}$  NMR (176 MHz,  $\text{CDCl}_3$ )  $\delta$  200.4, 150.8, 150.7, 135.9, 134.3, 131.5, 131.1, 130.8, 129.3 (2C), 129.2 (2C), 129.1 (2C), 128.8, 128.5, 126.3 (2C), 123.3, 75.2, 62.4, 58.8, 54.7, 49.6. HRMS calculated for  $[\text{C}_{24}\text{H}_{19}\text{N}_3\text{O}_3\text{S}+\text{H}^+]$ : 430.1220; found: 430.1229.  $[\alpha]_{\text{D}}^{24}$  = -81.8° ( $c$  = 1.0,  $\text{CHCl}_3$ ).

## 6. Synthesis of (*R*)-2-phenyl-2*H*-cyclohepta[*b*]thiophene-3-carbaldehyde **9**

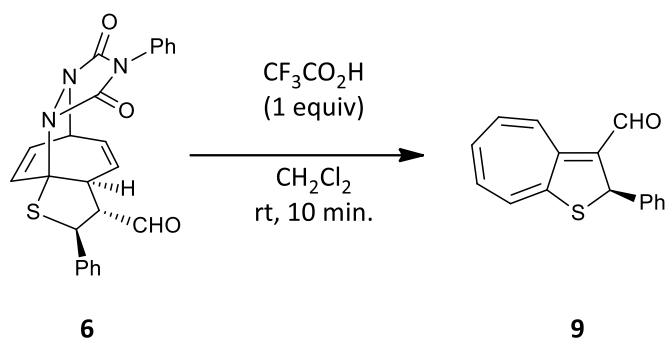

In an ordinary 4 mL glass vial, equipped with a Teflon-coated magnetic stirring bar and a screw cap **6** (42.9 mg; 0.1 mmol; 1.0 equiv.) was dissolved in  $\text{CH}_2\text{Cl}_2$  (1mL) and trifluoroacetic acid (11.4 mg; 0.1 mmol; 1.0 equiv.) was added in one portion. After stirring in ambient temperature for 10 minutes crude reaction mixture was directly subjected to flash column chromatography (eluent:  $\text{CH}_2\text{Cl}_2$ ). Product was obtained as a red amorphous solid in 75% yield (18.9 mg). (*R*)-2-Phenyl-2*H*-cyclohepta[*b*]thiophene-3-carbaldehyde  $^1\text{H}$  NMR (700 MHz, Chloroform-*d*)  $\delta$  9.75 (s, 1H), 7.38 – 7.34 (m, 2H), 7.34 – 7.30 (m, 2H), 7.29 (d,  $J$  = 11.9 Hz, 1H), 7.24 – 7.21 (m, 1H), 6.43 (dt,  $J$  = 8.7, 1.0 Hz, 1H), 6.42 (s, 1H), 6.24 (ddt,  $J$  = 10.8, 8.7, 0.9 Hz, 1H), 6.20 – 6.16 (m, 1H), 6.03 (s, 1H).  $^{13}\text{C}$  NMR (176 MHz,  $\text{CDCl}_3$ )  $\delta$  185.0, 160.6, 153.8, 143.8, 135.2, 133.9, 130.4, 129.6, 128.8 (2C), 127.7, 127.5 (2C), 124.2, 123.9, 56.6. HRMS calculated for  $[\text{C}_{16}\text{H}_{12}\text{OS}+\text{H}^+]$ : 253.0682; found: 253.0685.  $[\alpha]_{\text{D}}^{23}$  =  $-790.0^\circ$  ( $c$  = 1.0,  $\text{CHCl}_3$ ). The er was determined by UPC<sup>2</sup> using a chiral Chiralpack IA column gradient from 100%  $\text{CO}_2$  up to 40%; *i*-PrOH, 2.5 mL/min; detection wavelength = 336 nm;  $\tau_{\text{major}}$  = 4.52 min,  $\tau_{\text{minor}}$  = 4.69 min, (98:2 er).

## 7. One-pot synthesis of (*R*)-2-phenyl-2*H*-cyclohepta[*b*]thiophene-3-carbaldehyde **9**

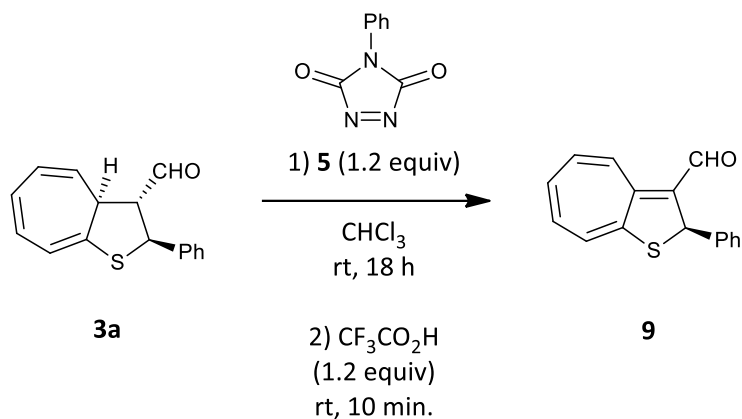

In an ordinary 4 mL glass vial, equipped with a Teflon-coated magnetic stirring bar and a screw cap **3a** (25.4 mg; 0.1 mmol; 1.0 equiv) was dissolved in  $\text{CHCl}_3$  (1mL) and 4-phenyl-1,2,4-triazoline-3,5-dione (21.0 mg; 0.12 mmol; 1.2 equiv) was added in one portion. After stirring in ambient temperature for 18 h trifluoroacetic acid (13.7 mg; 0.12 mmol; 1.2 equiv) was added in one portion. After stirring in room temperature for 30 minutes crude reaction mixture was directly subjected to flash column chromatography (eluent:  $\text{CH}_2\text{Cl}_2$ ). Product was obtained as a red amorphous solid in 52% yield (13.1 mg). NMR and HPLC data were in accordance with previously obtained results.

## 8. Crystal and X-ray data for (2*S*,3*R*,3*aS*)-2-(4-nitrophenyl)-3,3*a*-dihydro-2*H*-cyclohepta[*b*]thiophene-3-carbaldehyde 3d

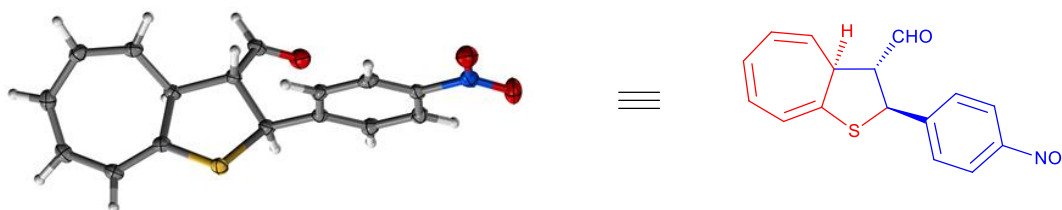

Single crystal X-ray diffraction data were collected at 100 K by the  $\omega$ -scan technique using a RIGAKU XtaLAB Synergy, Dualflex, Pilatus 300K diffractometer<sup>3</sup> with PhotonJet micro-focus X-ray Source Cu-K $\alpha$  ( $\lambda = 1.54184$  Å). Data collection, cell refinement, data reduction and absorption correction were performed using CrysAlis PRO software.<sup>3</sup> The crystal structure was solved by using direct methods with the SHELXT 2018/2 program.<sup>4</sup> Atomic scattering factors were taken from the International Tables for X-ray Crystallography. Positional parameters of non-H-atoms were refined by a full-matrix least-squares method on  $F^2$  with anisotropic thermal parameters by using the SHELXL 2018/3 program.<sup>5</sup> All hydrogen atoms were placed in calculated positions (C–H = 0.95–1.00 Å) and included as riding contributions with isotropic displacement parameters set to 1.2 times the  $U_{eq}$  of the parent atom.

**3d:** Formula  $C_{16}H_{13}NO_3S$ , orthorhombic, space group  $P2_12_12_1$ ,  $Z = 4$ , unit cell constants  $a = 6.9092(1)$ ,  $b = 10.1436(1)$ ,  $c = 19.7001(1)$  Å,  $V = 1380.67(3)$  Å<sup>3</sup>. The integration of the data yielded a total of 40039 reflections with  $\theta$  angles in the range of 4.49 to 66.53°, of which all 2435 unique ( $R_{int} = 2.04\%$ ) were greater than  $2\sigma(F^2)$ . The final anisotropic full-matrix least-squares refinement on  $F^2$  with 191 parameters converged at  $R_1 = 1.92\%$  and  $wR_2 = 4.83\%$  for all data. The largest peak in the final difference electron density synthesis was  $0.152$  e Å<sup>-3</sup> and the largest hole was  $-0.150$  e Å<sup>-3</sup>. The goodness-of-fit was 1.100. The absolute configuration was unambiguously determined from anomalous scattering, by calculating the  $x$  Flack parameter<sup>6</sup> of  $-0.007(3)$  using 995 quotients.

CCDC 1906777 contain the supplementary crystallographic data for this paper. These data can be obtained free of charge from The Cambridge Crystallographic Data Centre via [www.ccdc.cam.ac.uk/structures](http://www.ccdc.cam.ac.uk/structures)

**9. Crystal and X-ray data for (2*S*\*,3*R*\*,3*aS*\*,6*S*\*,11*aR*\*)-8,10-dioxo-2,9-diphenyl-3,3*a*,6,8,9,10-hexahydro-2*H*-6,11*a*-ethenothieno[2,3-*c*][1,2,4]triazolo[1,2-*a*][1,2]diazepine-3-carbaldehyde *rac*-6**

The relative configuration of **6** was assigned based on the single crystal X-ray analysis of crystals obtained via recrystallization of racemic sample of *rac*-**6**. The absolute configuration of **6** was established given the result of this experiment and the assignment of the absolute configuration of **3** (for details see paragraph above). The single crystal X-ray diffraction study at 100 K revealed that compound *rac*-**6** (C<sub>24</sub>H<sub>19</sub>N<sub>3</sub>O<sub>3</sub>S) crystallizes in the centrosymmetric monoclinic space group *P*2<sub>1</sub>/*c* (*Z* = 8) and the crystal structure consists of two crystallographically independent formula units in the unit cell. The independent molecules have an inverted configuration and a similar conformation. One of these molecules has a disordered formyl group.

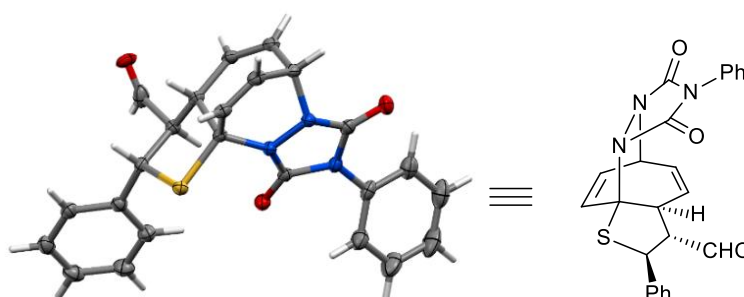

Single crystal X-ray diffraction data were collected at 100 K by the  $\omega$ -scan technique using a RIGAKU XtaLAB Synergy, Dualflex, Pilatus 300K diffractometer<sup>3</sup> with PhotonJet micro-focus X-ray Source Cu-K $\alpha$  ( $\lambda$  = 1.54184 Å). Data collection, cell refinement, data reduction and absorption correction were performed using CrysAlis PRO software.<sup>3</sup> The crystal structure was solved by using direct methods with the SHELXT 2018/2 program.<sup>4</sup> Atomic scattering factors were taken from the International Tables for X-ray Crystallography. Positional parameters of non-H-atoms were refined by a full-matrix least-squares method on  $F^2$  with anisotropic thermal parameters by using the SHELXL 2018/3 program.<sup>5</sup> All hydrogen atoms were placed in calculated positions (C–H = 0.95–1.00 Å) and included as riding contributions with isotropic displacement parameters set to 1.2 times the  $U_{eq}$  of the parent atom.

*rac*-**6**: Formula C<sub>24</sub>H<sub>19</sub>N<sub>3</sub>O<sub>3</sub>S, monoclinic, space group *P*2<sub>1</sub>/*c*, *Z* = 8, unit cell constants  $a$  = 10.2822(1),  $b$  = 14.2079(1),  $c$  = 27.6670(1) Å,  $\beta$  = 100.257(1)°,  $V$  = 3977.24(5) Å<sup>3</sup>. The integration of the data yielded a total of 134496 reflections with  $\theta$  angles in the range of 3.25 to 66.60 of which 7009 were independent ( $R_{int}$  = 2.72%), and 6889 were greater than  $2\sigma(F^2)$ . The final anisotropic full-matrix least-squares refinement on  $F^2$  with 568 parameters converged to  $R_1$  = 3.32% for observed data and  $wR_2$  = 8.36% for all data. The goodness-of-fit was 1.074.

The largest peak in the final difference electron density synthesis was 0.357 e Å<sup>-3</sup> and the largest hole was -0.263 e Å<sup>-3</sup>. CCDC 1920168 contain the supplementary crystallographic data

for this paper. These data can be obtained free of charge from The Cambridge Crystallographic Data Centre via [www.ccdc.cam.ac.uk/structures](http://www.ccdc.cam.ac.uk/structures)

- 
- 3 Rigaku OD. CrysAlis PRO. Rigaku Oxford Diffraction Ltd, Yarnton, Oxfordshire, England, 2019.  
4 G. M. Sheldrick *Acta Cryst.* 2015, **A71**, 3.  
5 G. M. Sheldrick *Acta Cryst.* 2015, **C71**, 3.  
6 S. Parsons, H. D. Flac and T. Wagner *Acta Cryst.* 2013, **B69**, 249.

## 10. NMR data

### (2*S*,3*R*,3*aS*)-2-Phenyl-3,3a-dihydro-2*H*-cyclohepta[*b*]thiophene-3-carbaldehyde 3a

#### <sup>1</sup>H NMR

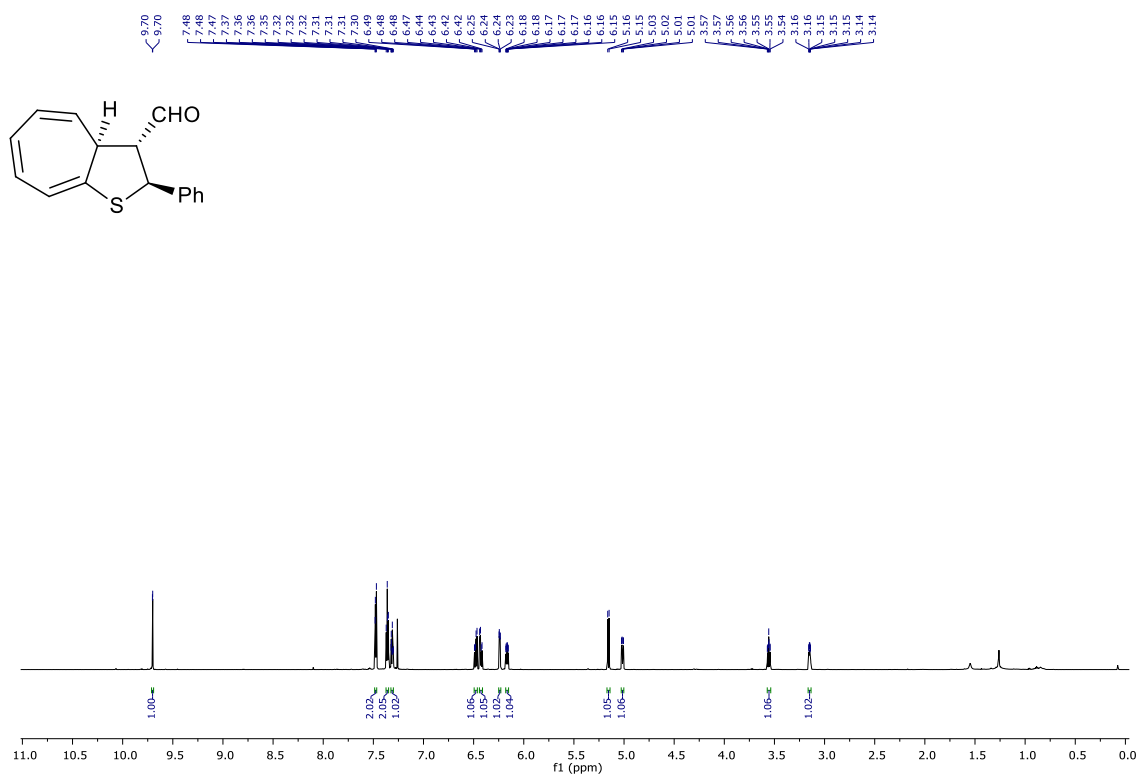

#### <sup>13</sup>C NMR

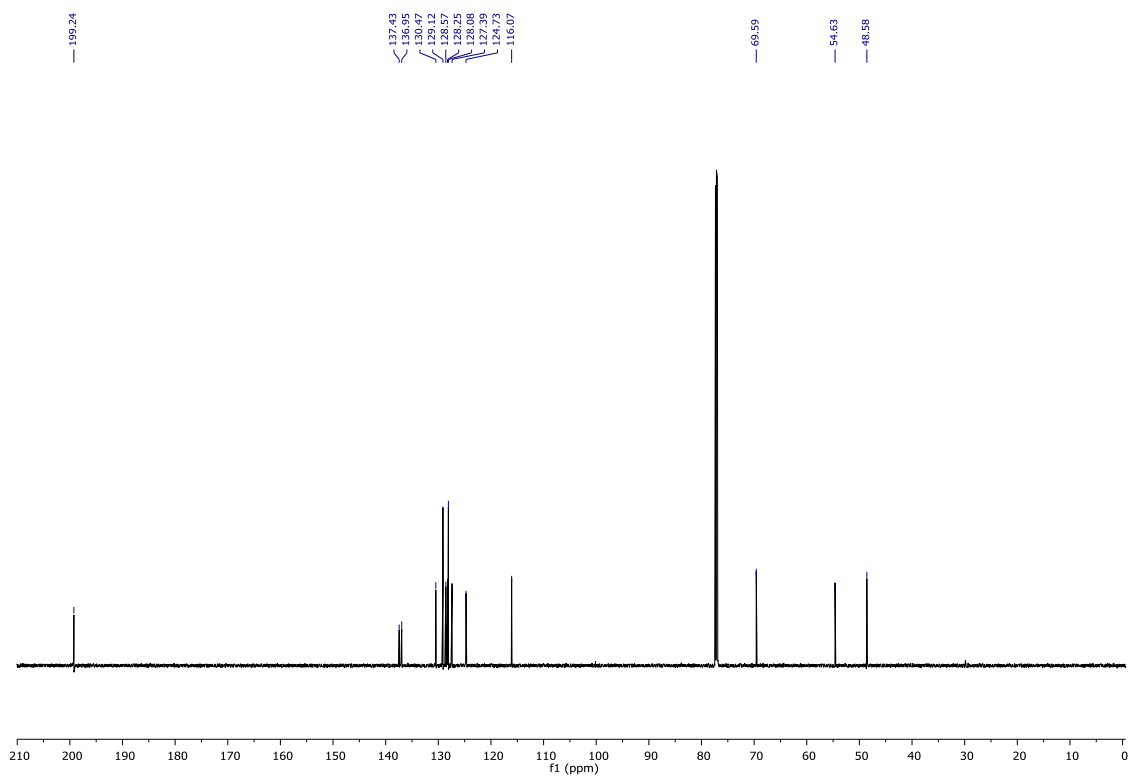

**(2*S*,3*R*,3*aS*)-2-(*p*-Tolyl)-3,3*a*-dihydro-2*H*-cyclohepta[*b*]thiophene-3-carbaldehyde 3b**

**<sup>1</sup>H NMR**

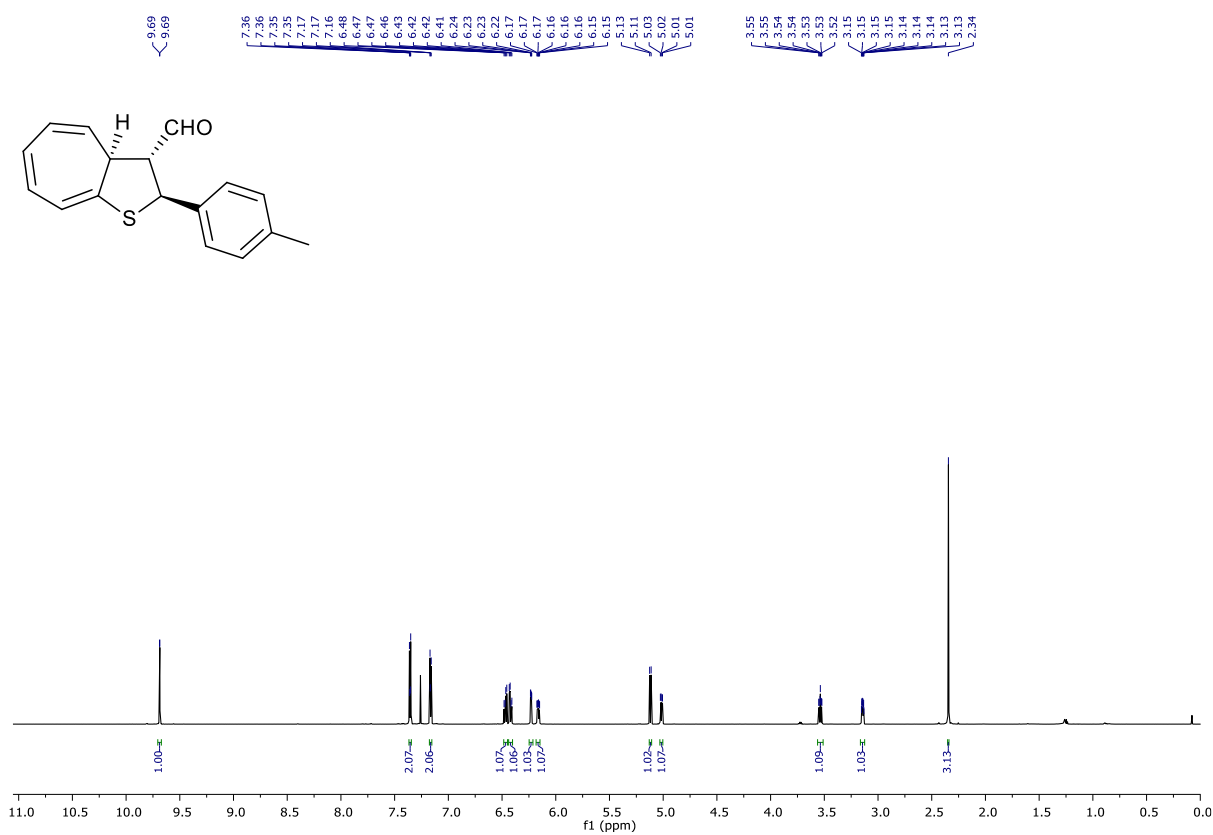

**<sup>13</sup>C NMR**

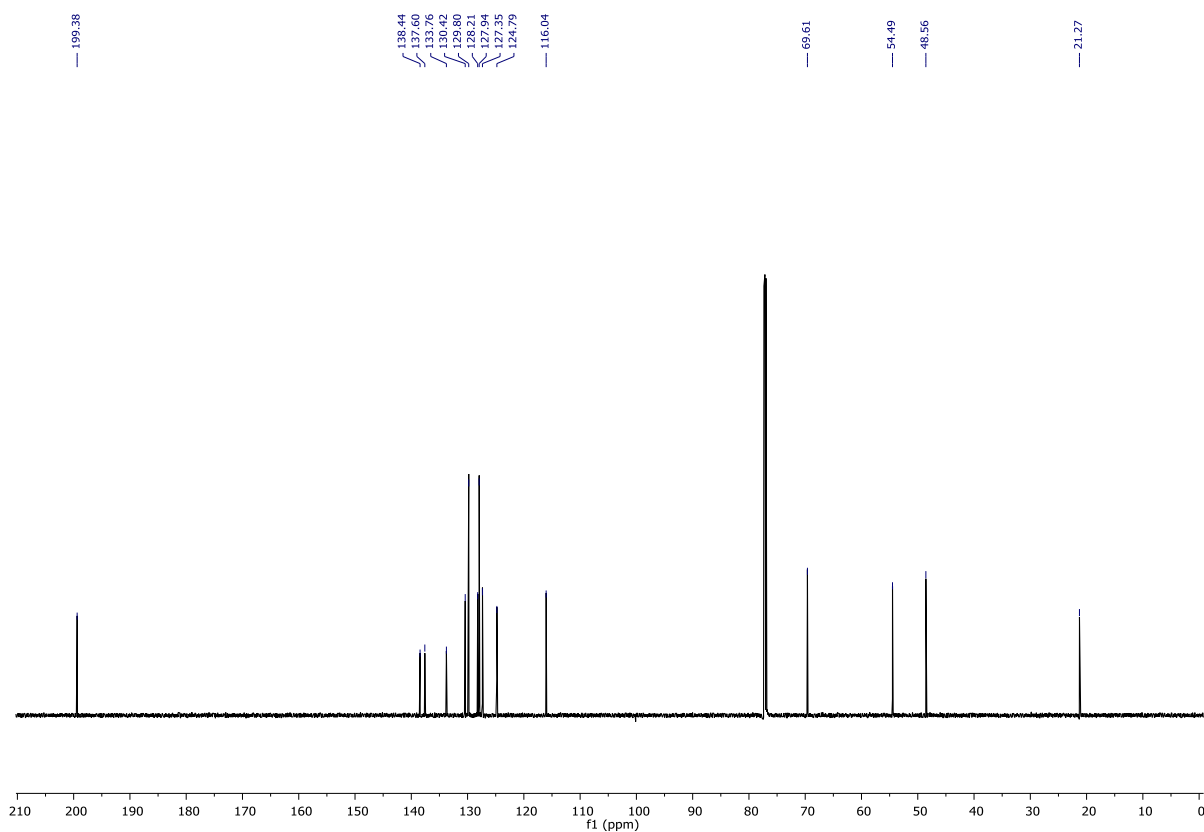

**(2*S*,3*R*,3*aS*)-2-(4-Methoxyphenyl)-3,3*a*-dihydro-2*H*-cyclohepta[*b*]thiophene-3-carbaldehyde 3c**

**<sup>1</sup>H NMR**

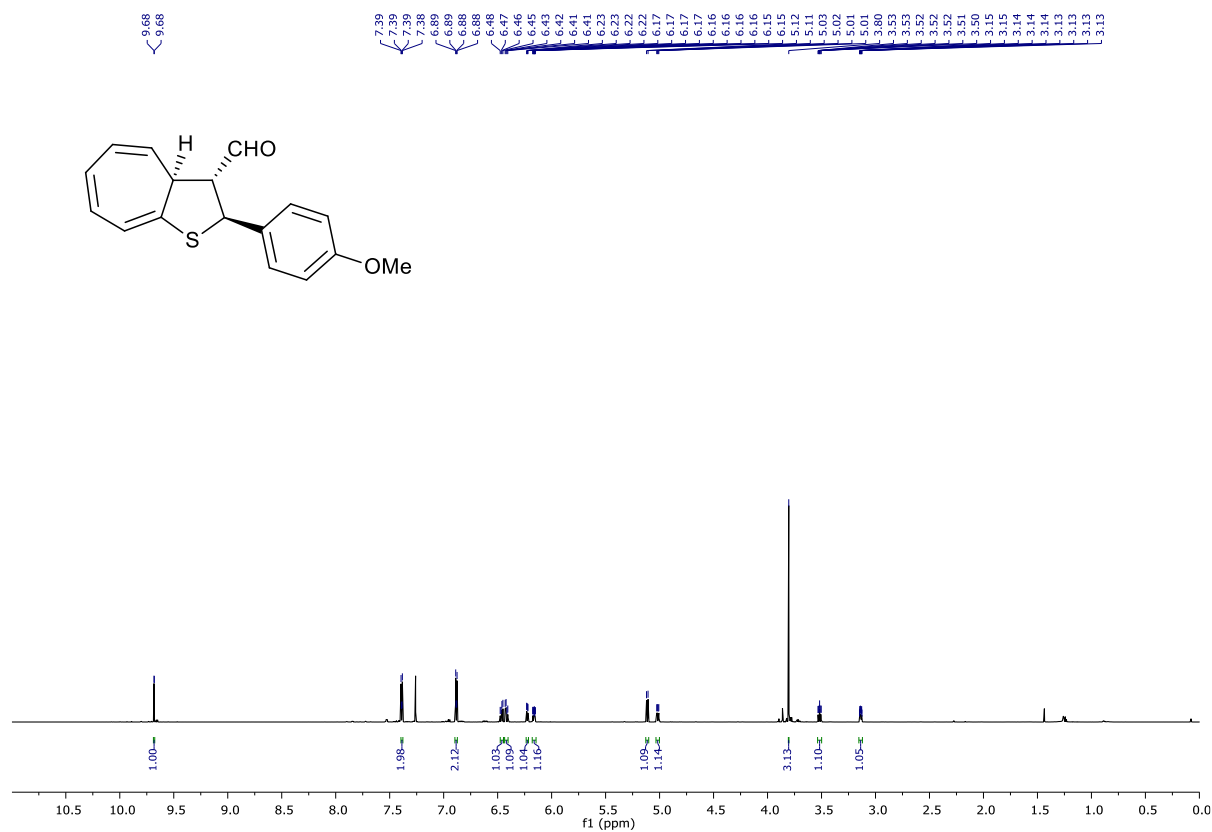

**<sup>13</sup>C NMR**

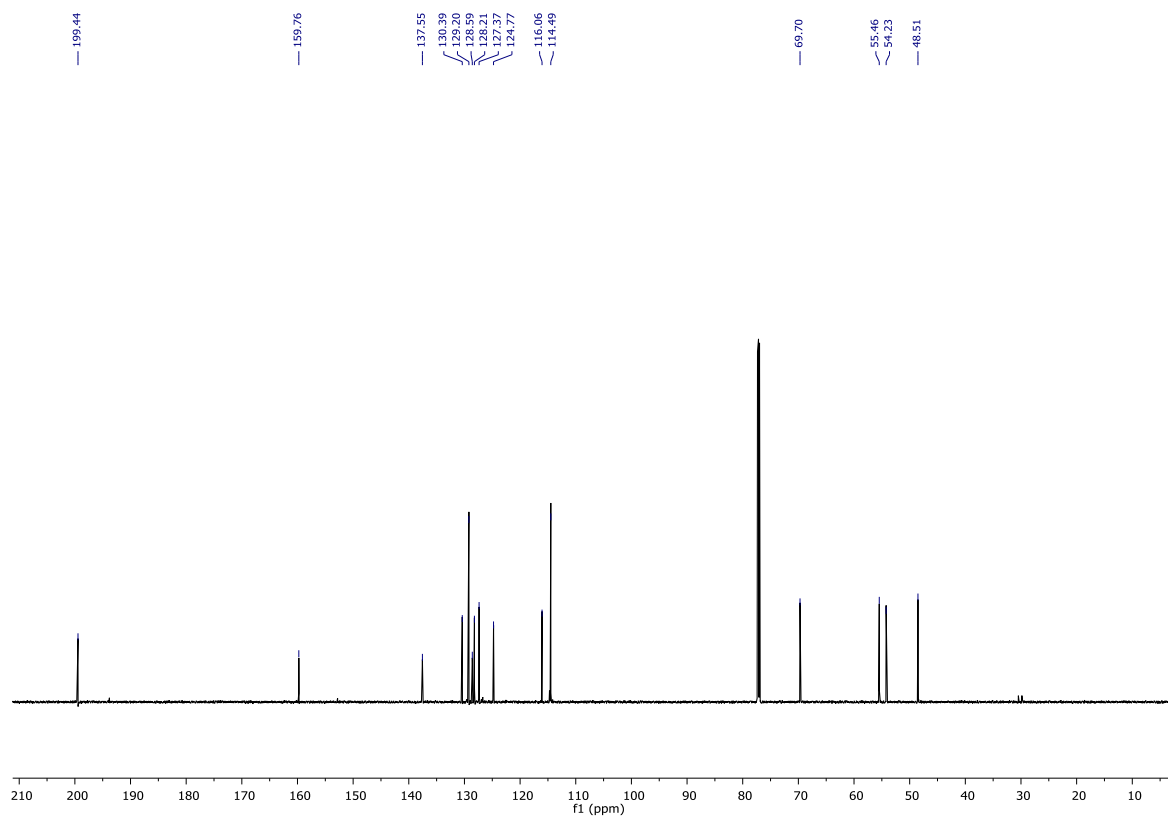

**(2*S*,3*R*,3*aS*)-2-(4-Nitrophenyl)-3,3*a*-dihydro-2*H*-cyclohepta[*b*]thiophene-3-carbaldehyde 3d**

**<sup>1</sup>H NMR**

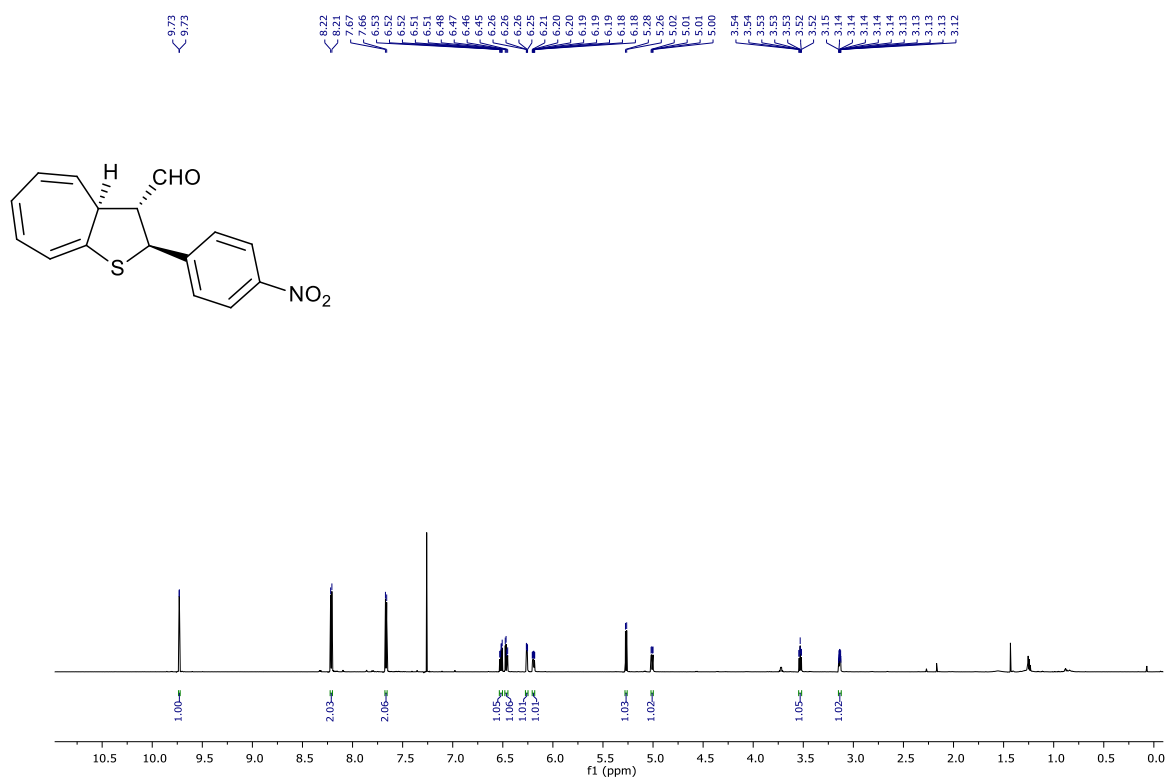

**(2*S*,3*R*,3*aS*)-2-(4-Chlorophenyl)-3,3*a*-dihydro-2*H*-cyclohepta[*b*]thiophene-3-carbaldehyde**  
**3e**

**<sup>1</sup>H NMR**

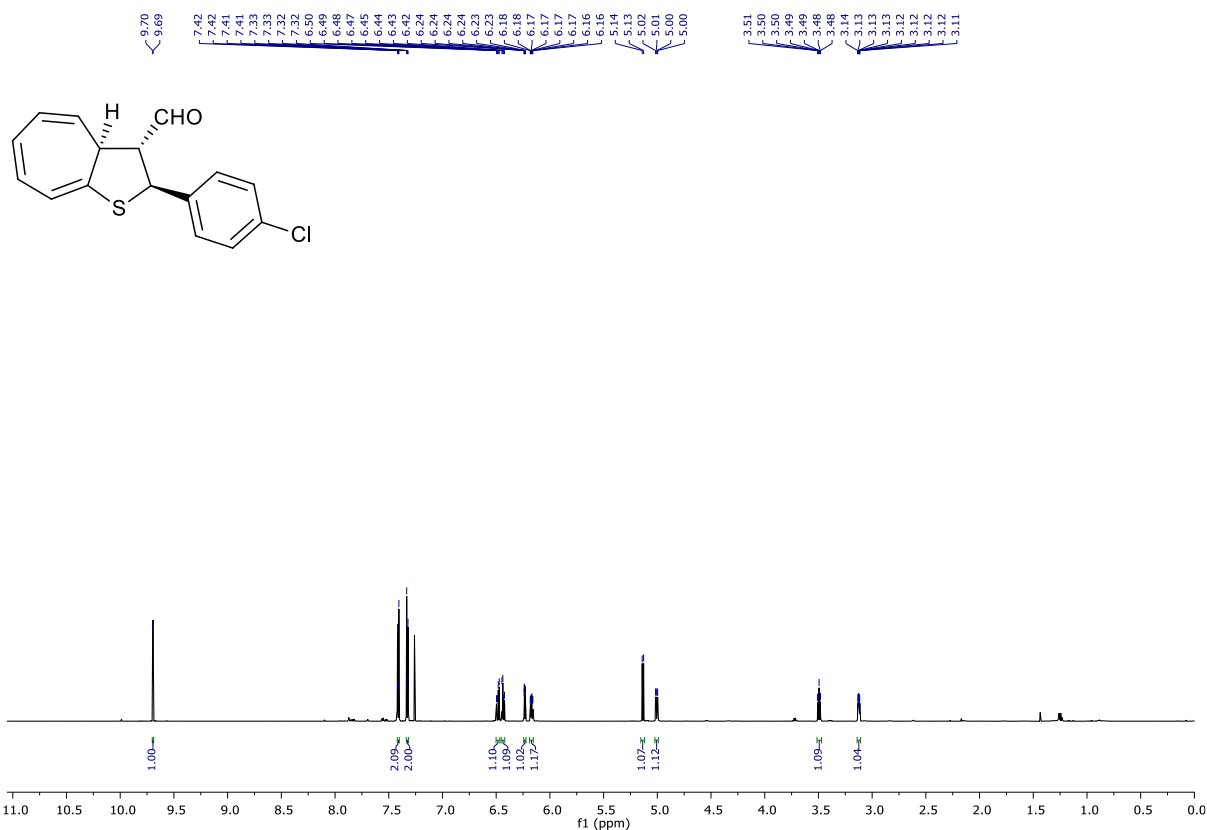

**<sup>13</sup>C NMR**

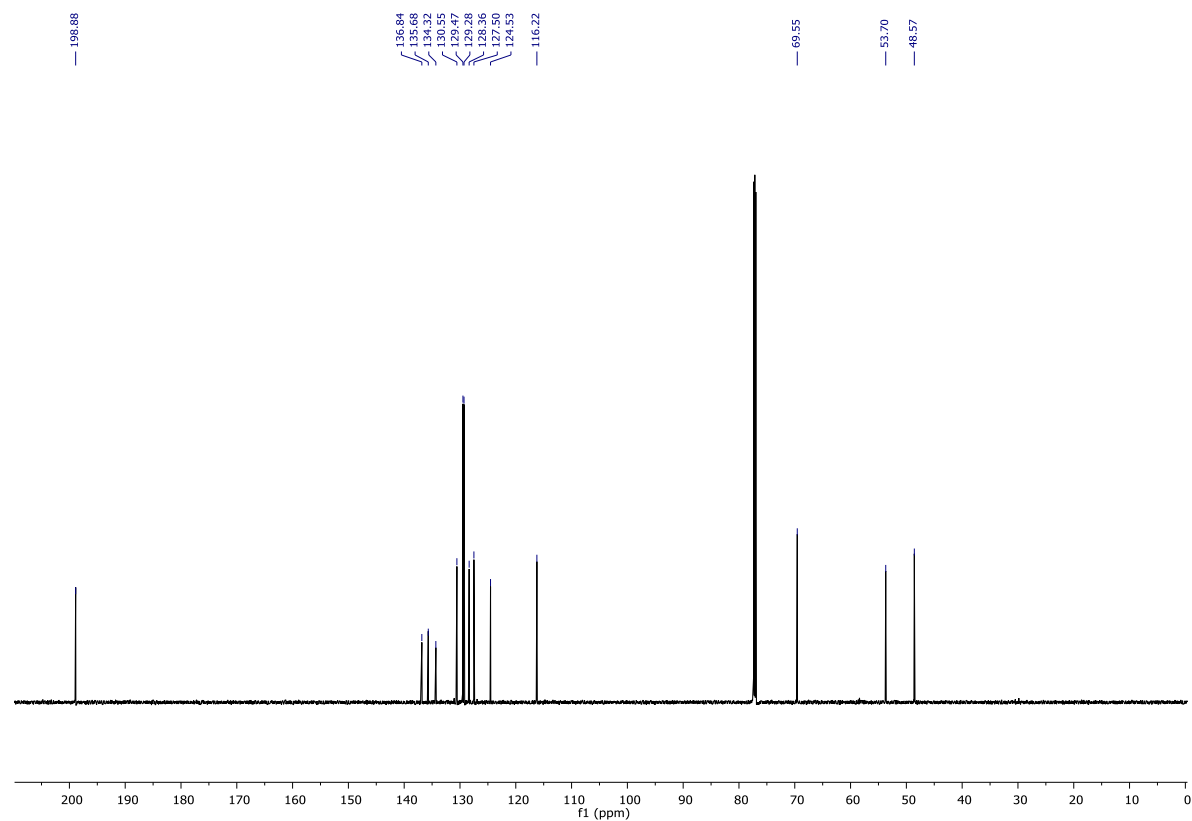

**(2*S*,3*R*,3*aS*)-2-(3-Chlorophenyl)-3,3*a*-dihydro-2*H*-cyclohepta[*b*]thiophene-3-carbaldehyde**  
**3f**

**<sup>1</sup>H NMR**

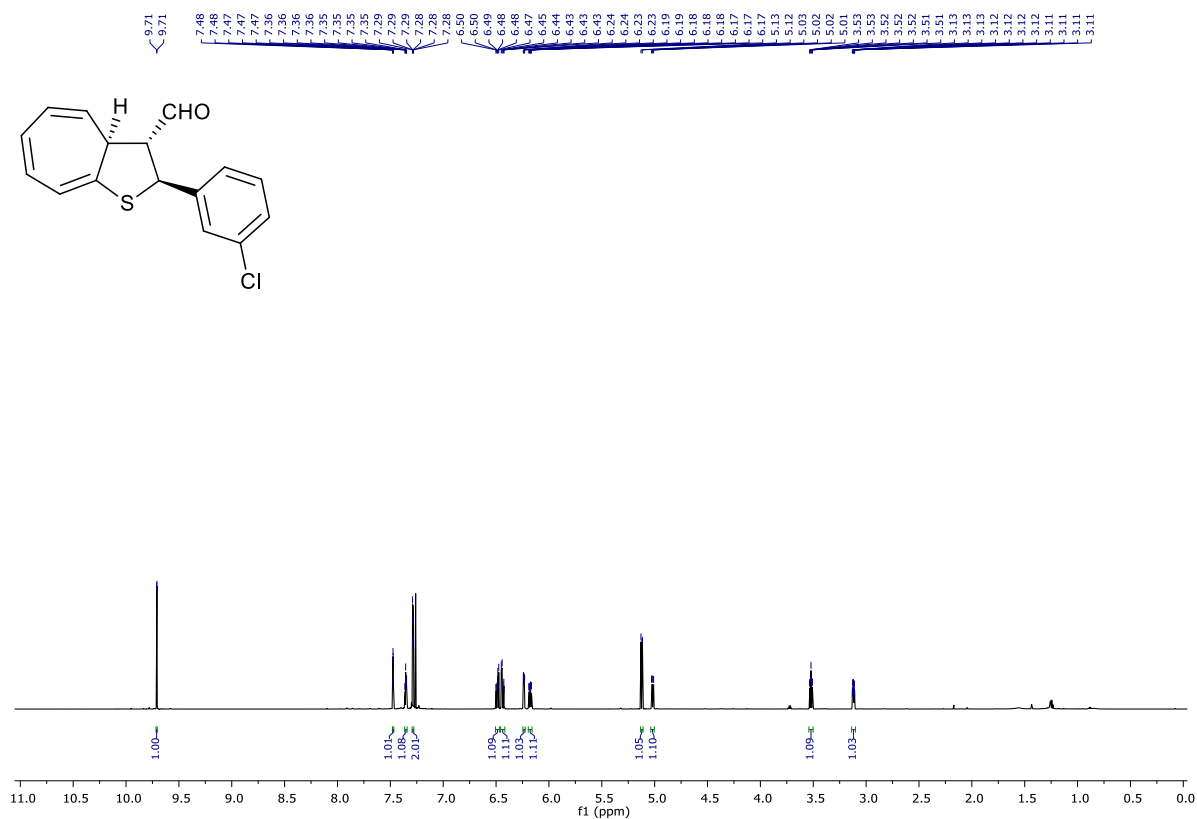

**<sup>13</sup>C NMR**

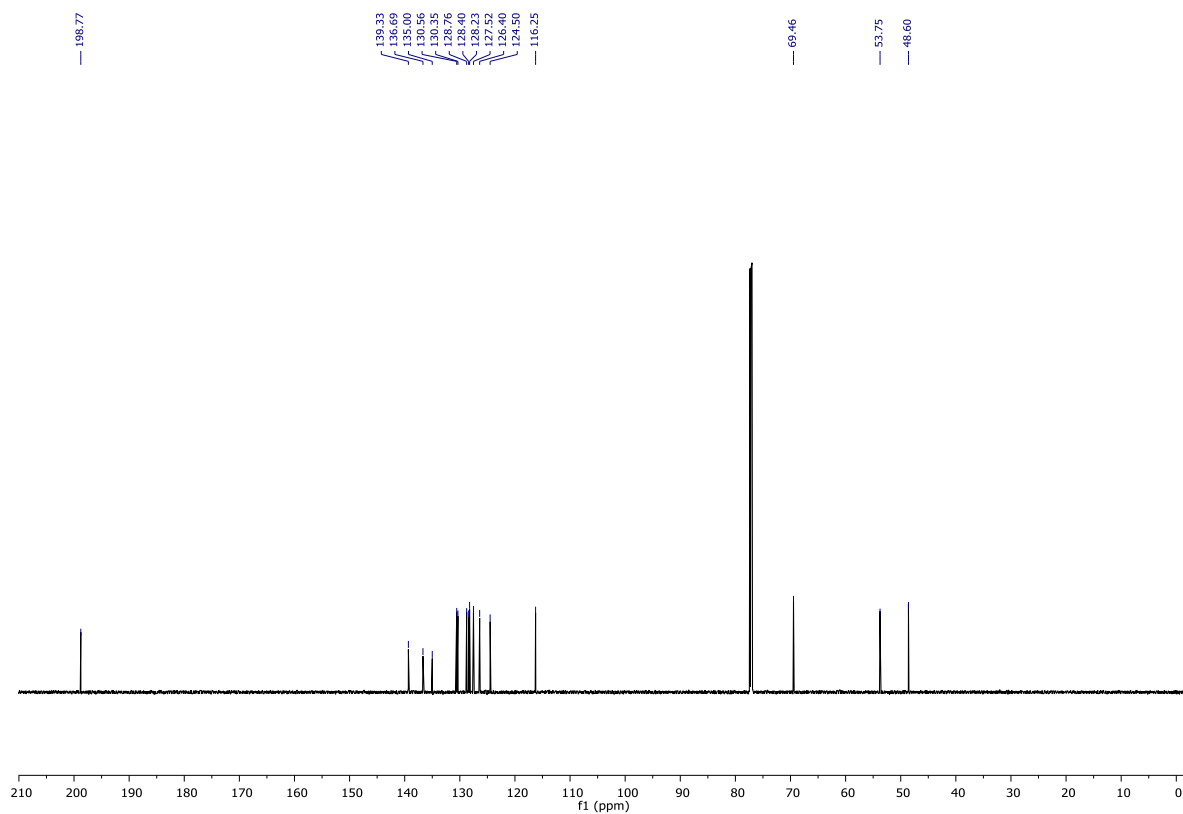

**(2*S*,3*R*,3*aS*)-2-(2-Chlorophenyl)-3,3*a*-dihydro-2*H*-cyclohepta[*b*]thiophene-3-carbaldehyde**  
**3g**

**<sup>1</sup>H NMR**

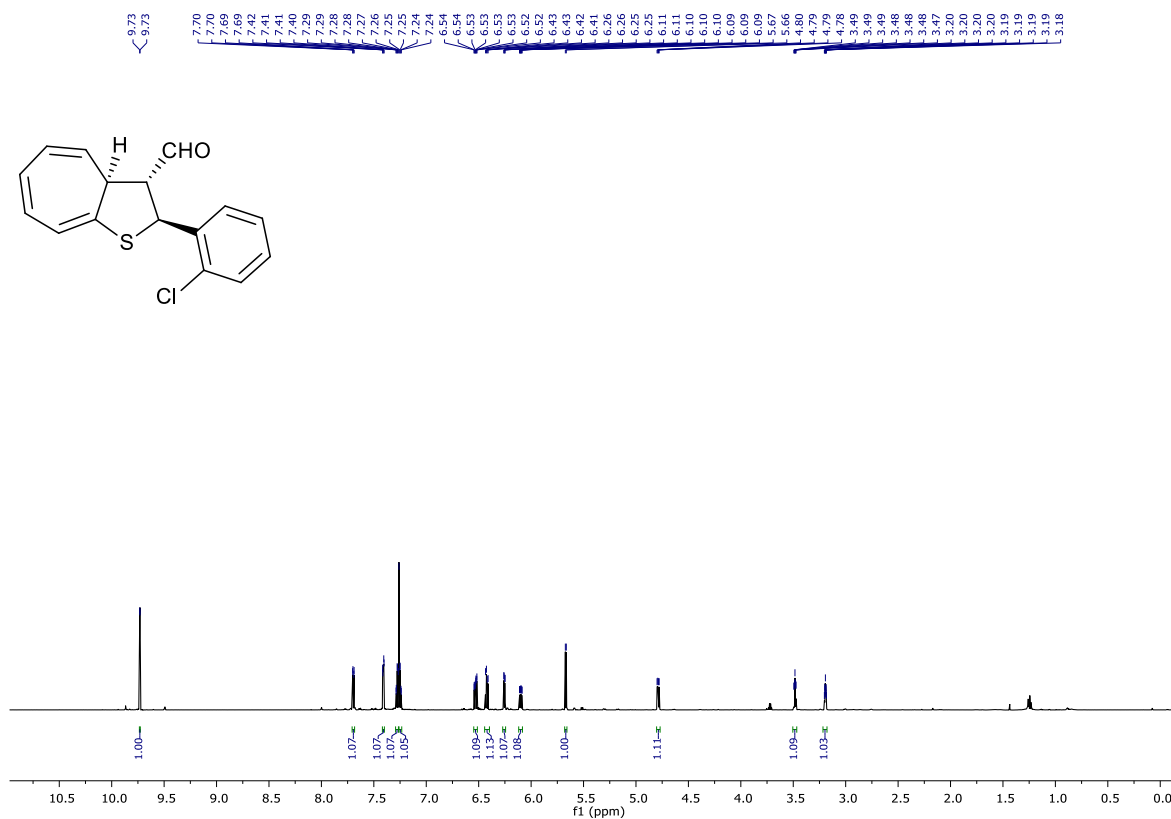

**<sup>13</sup>C NMR**

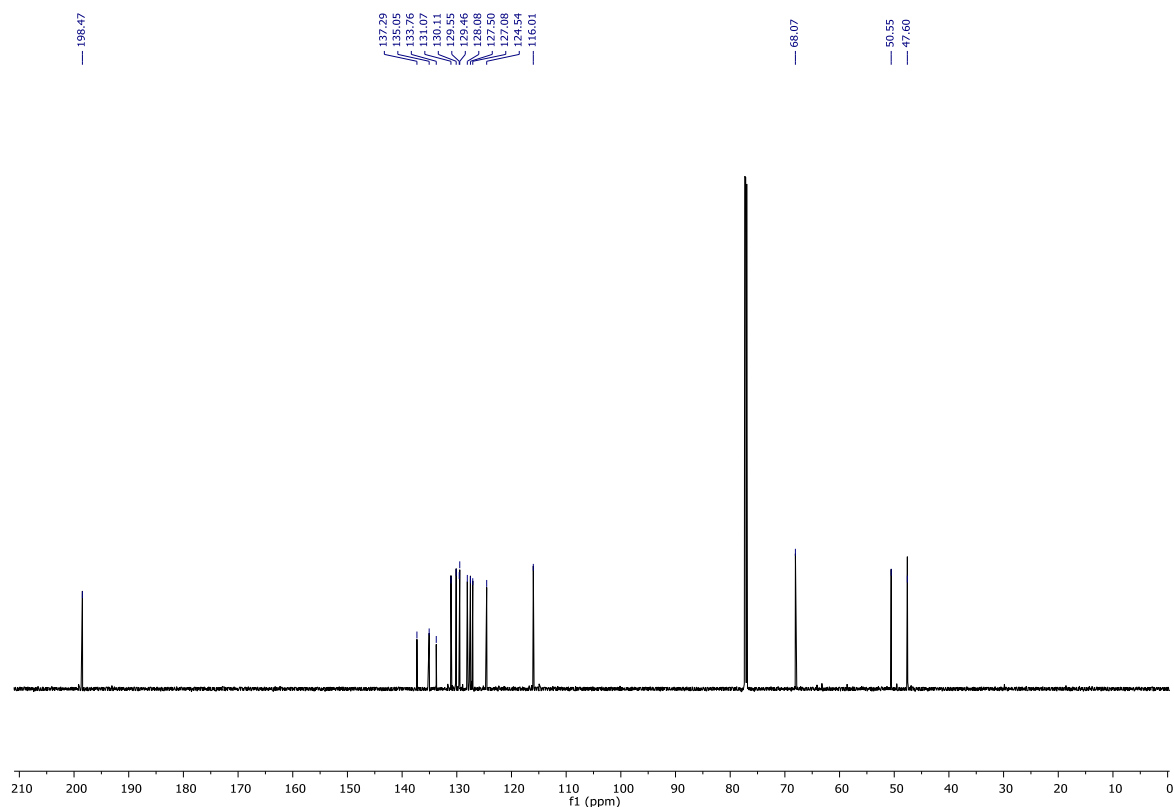

<sup>1</sup>H NMR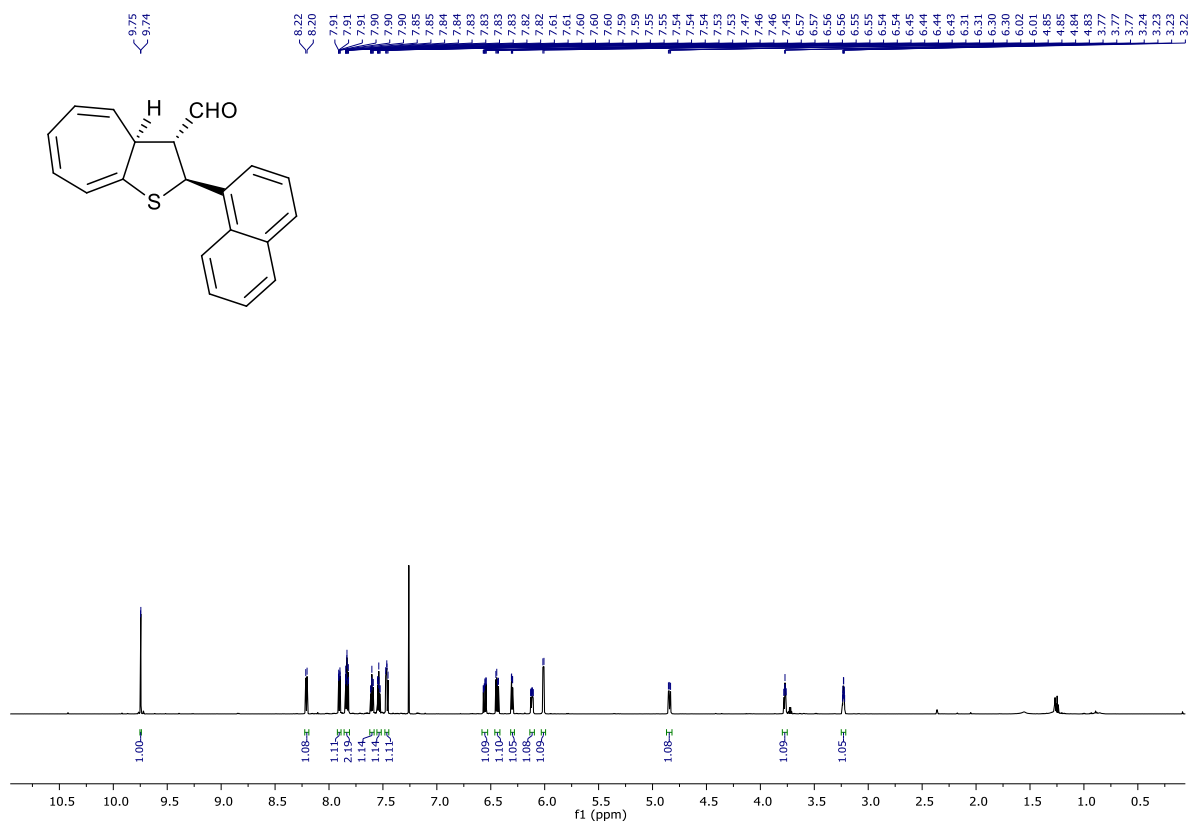

**$^{13}\text{C}$  NMR**

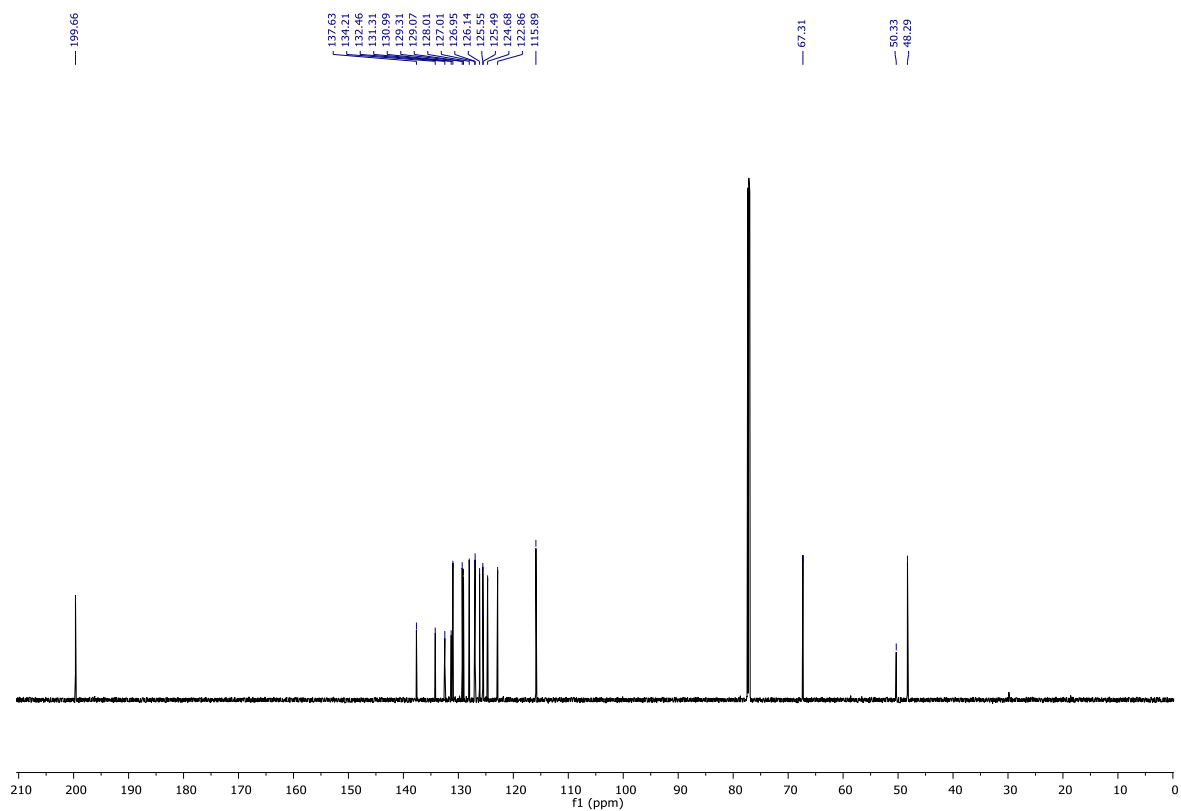

**(2*S*,3*R*,3*aS*)-2-(Furan-2-yl)-3,3*a*-dihydro-2*H*-cyclohepta[*b*]thiophene-3-carbaldehyde 3i**

<sup>1</sup>H NMR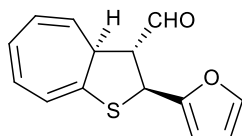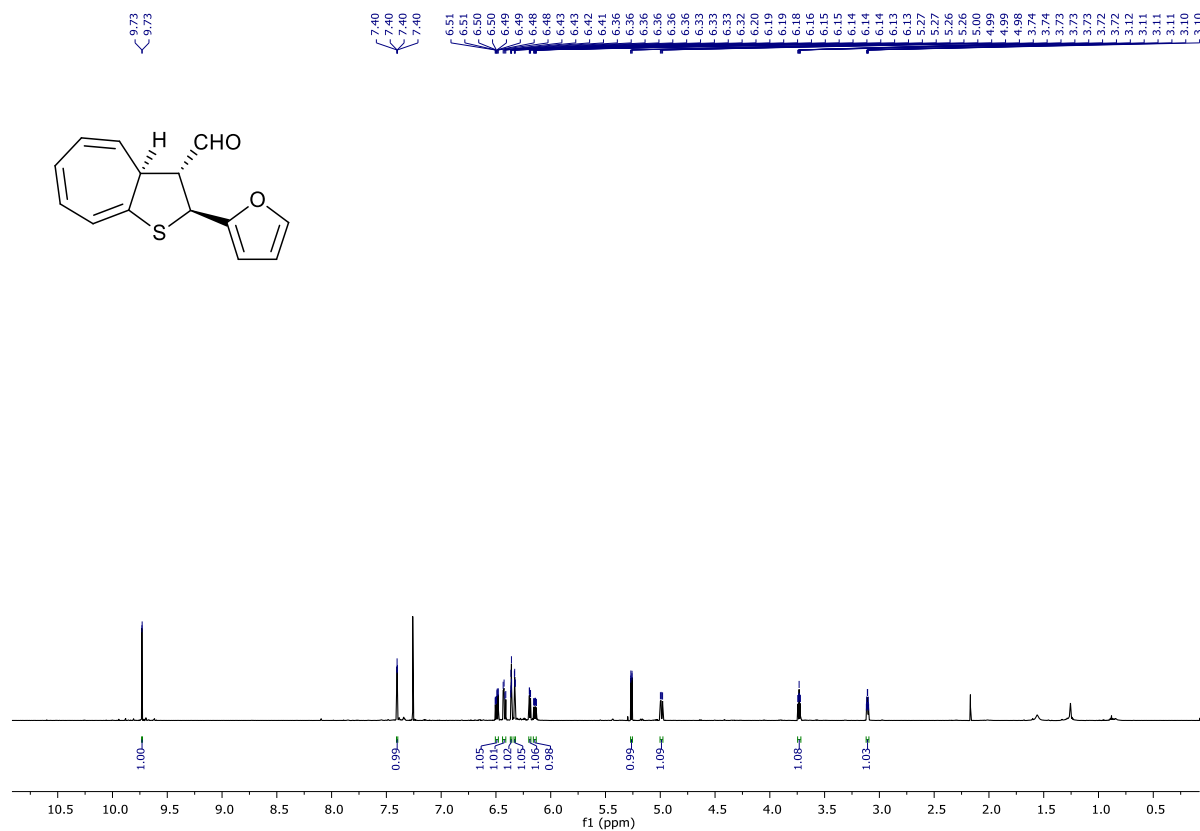

**$^{13}\text{C}$  NMR**

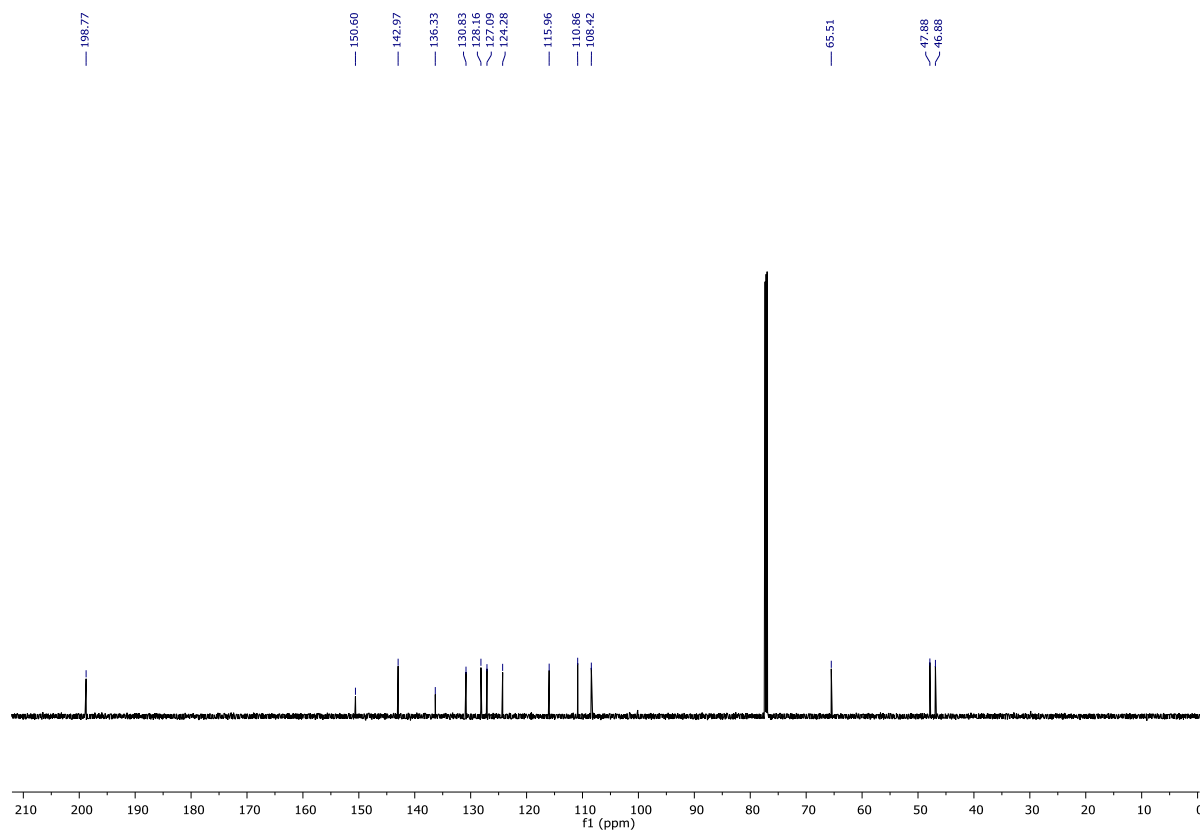

**(2*R*,3*R*,3*aS*)-2-Propyl-3,3*a*-dihydro-2*H*-cyclohepta[*b*]thiophene-3-carbaldehyde 3j**

**<sup>1</sup>H NMR**

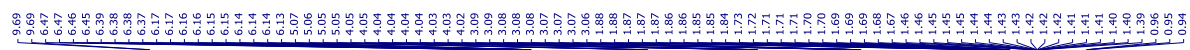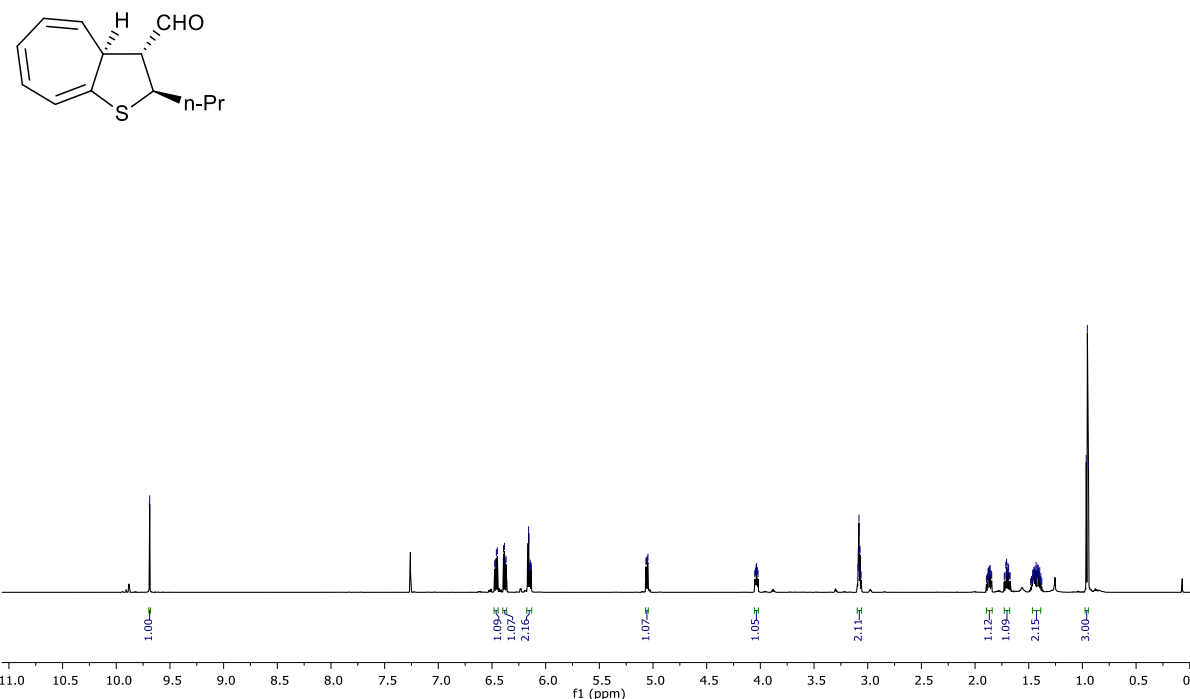

**<sup>13</sup>C NMR**

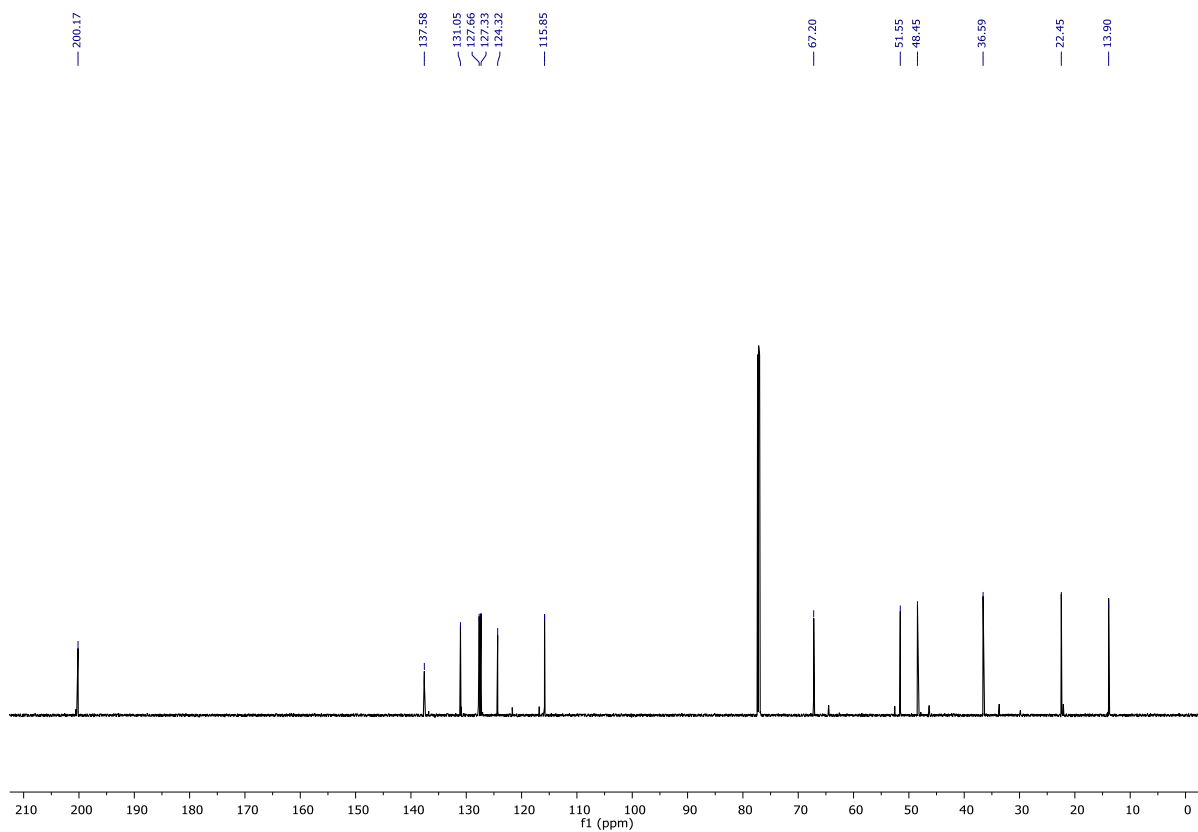

**(2*R*,3*R*,3*aS*)-2-Hexyl-3,3*a*-dihydro-2*H*-cyclohepta[*b*]thiophene-3-carbaldehyde 3k**

**<sup>1</sup>H NMR**

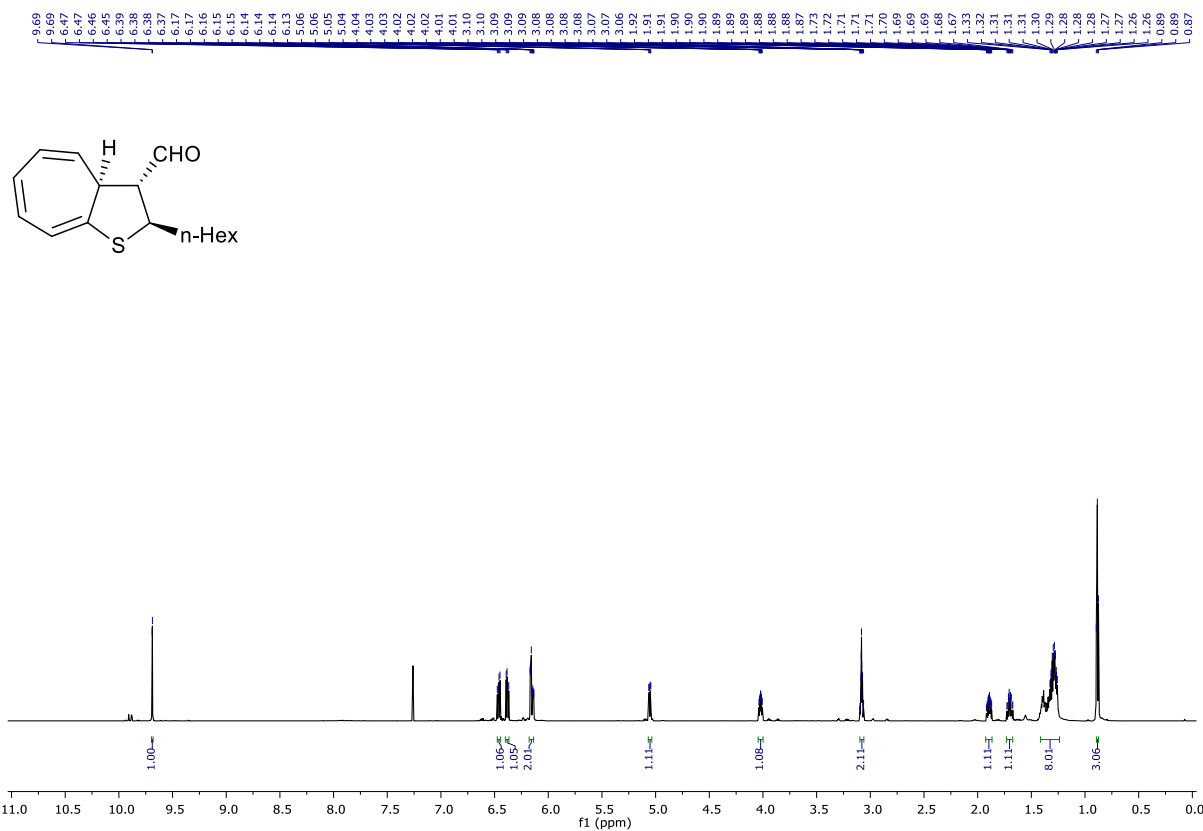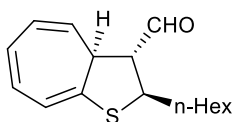

**<sup>13</sup>C NMR**

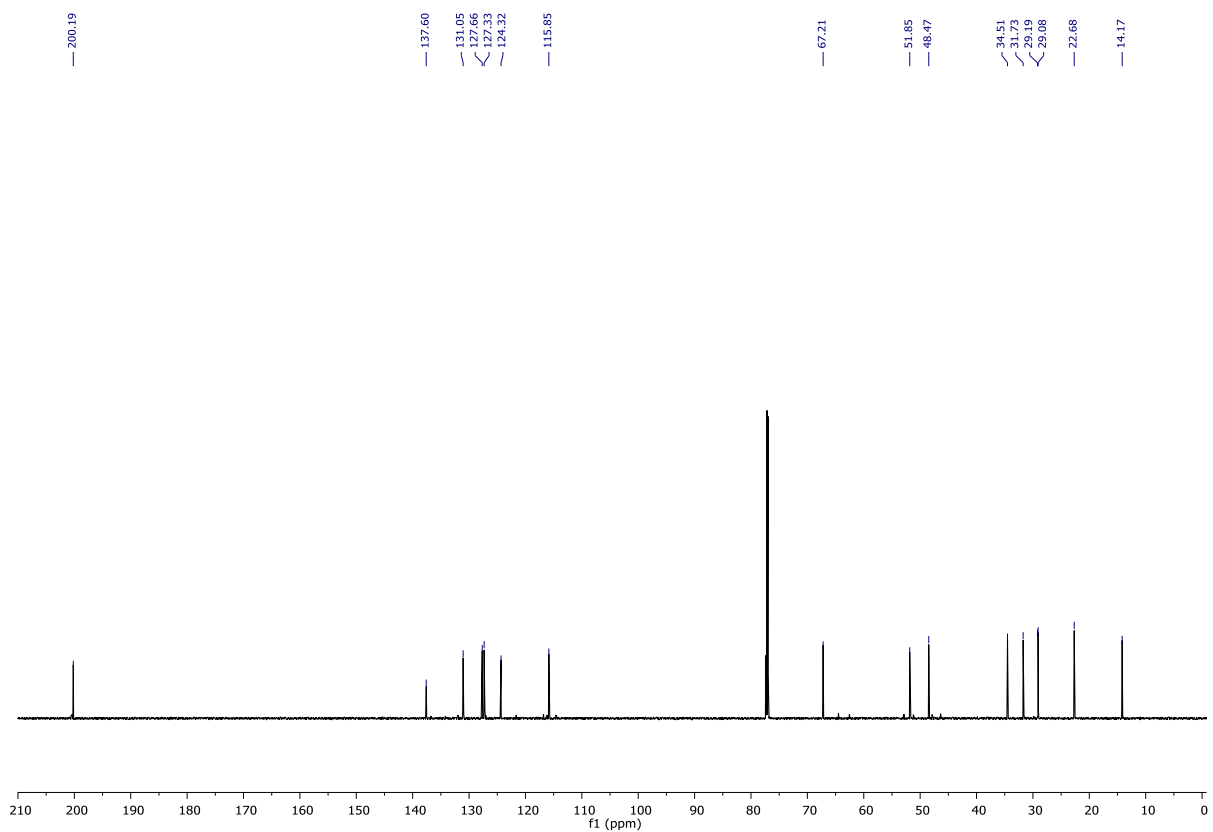

<sup>1</sup>H NMR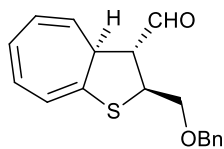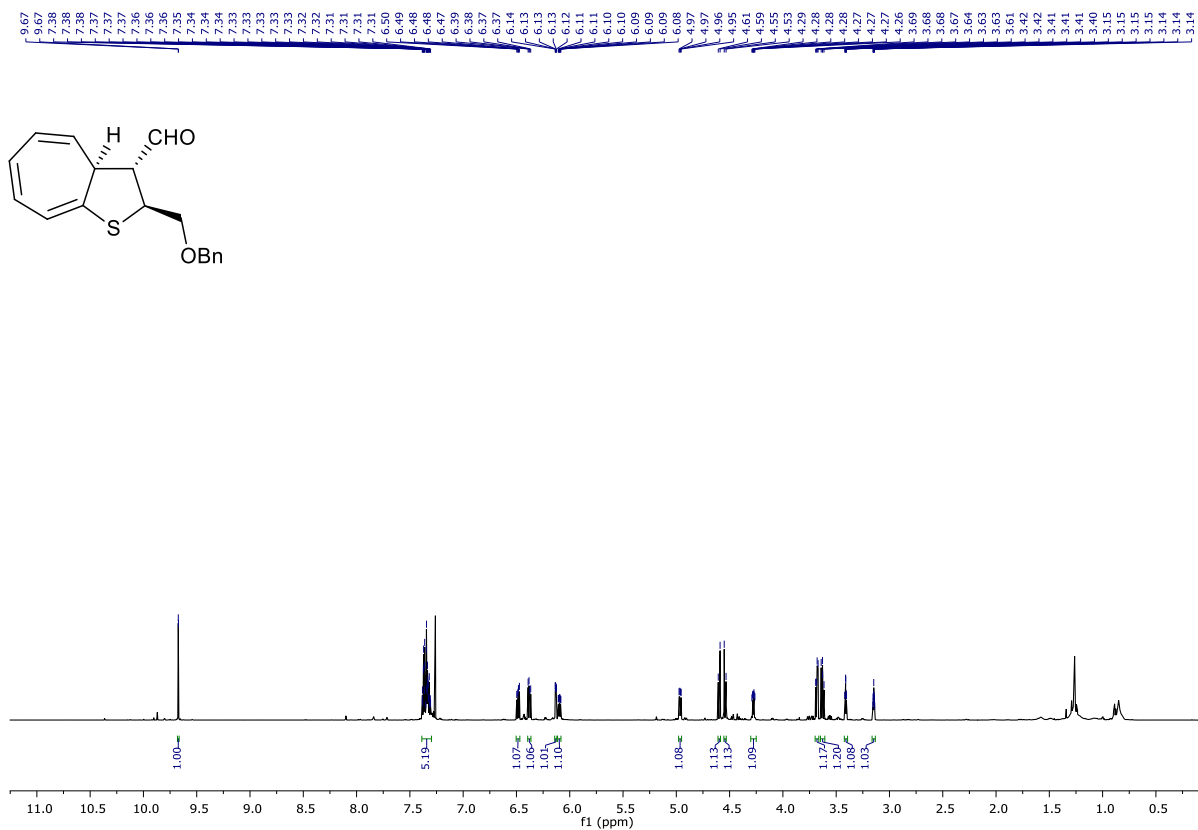

**$^{13}\text{C}$  NMR**

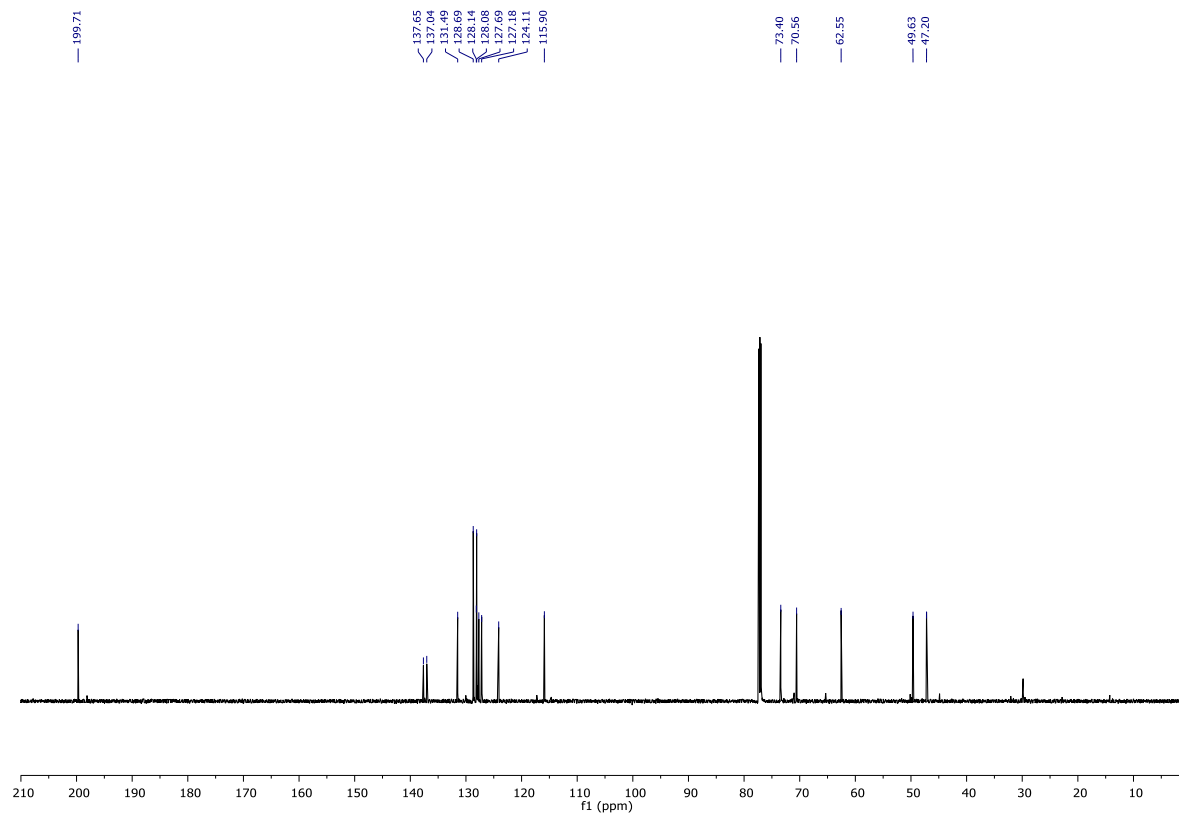

<sup>1</sup>H NMR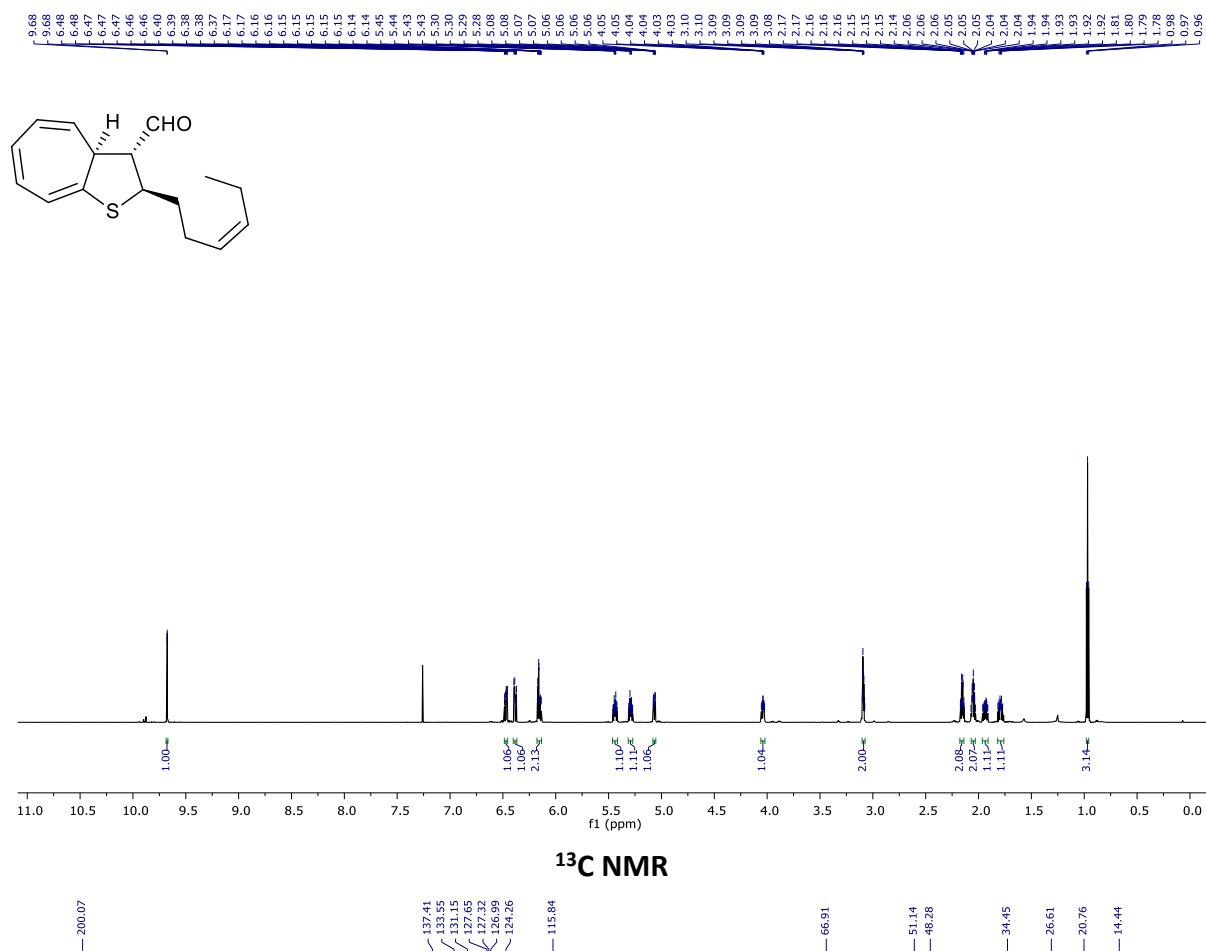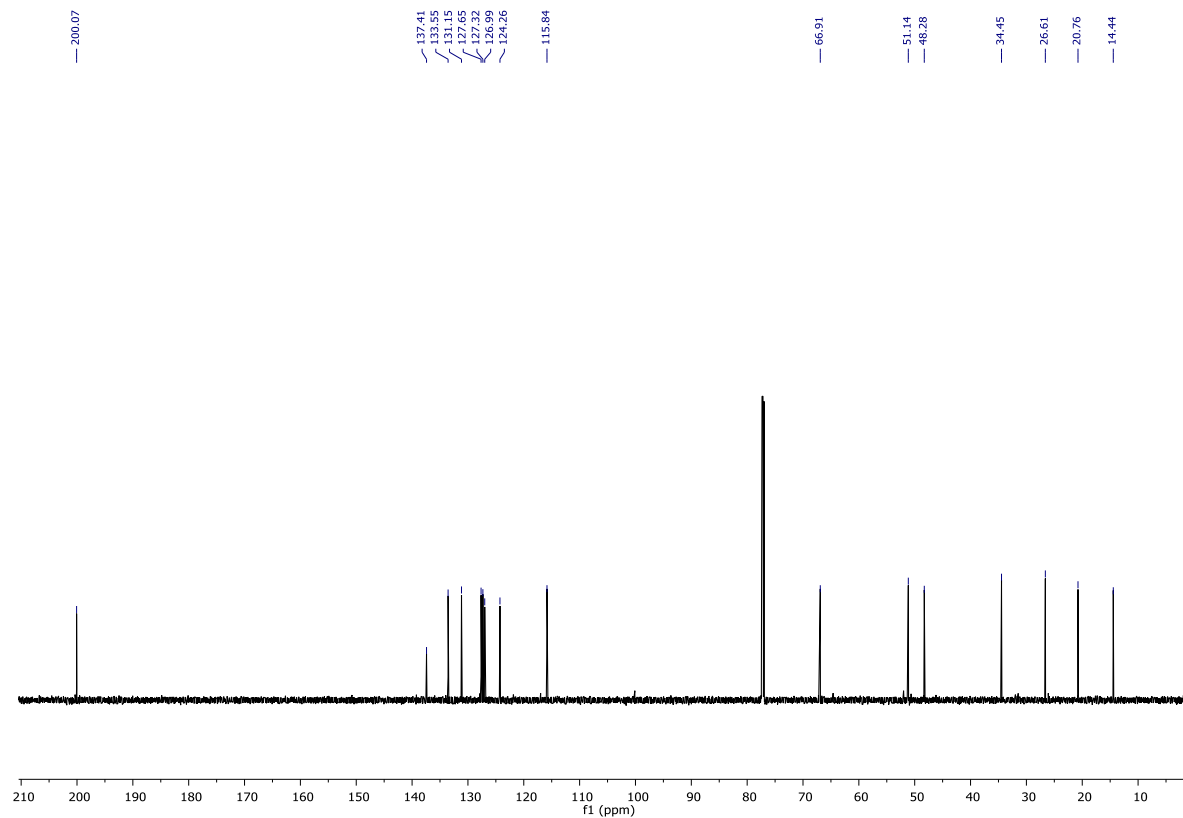

<sup>1</sup>H NMR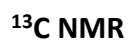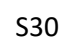

**(2*S*,3*R*,3*aS*,6*S*,11*aR*)-8,10-Dioxo-2,9-diphenyl-3,3*a*,6,8,9,10-hexahydro-2*H*-6,11*a*-ethenothieno[2,3-*c*][1,2,4]triazolo[1,2-*a*][1,2]diazepine-3-carbaldehyde 6**

**<sup>1</sup>H NMR**

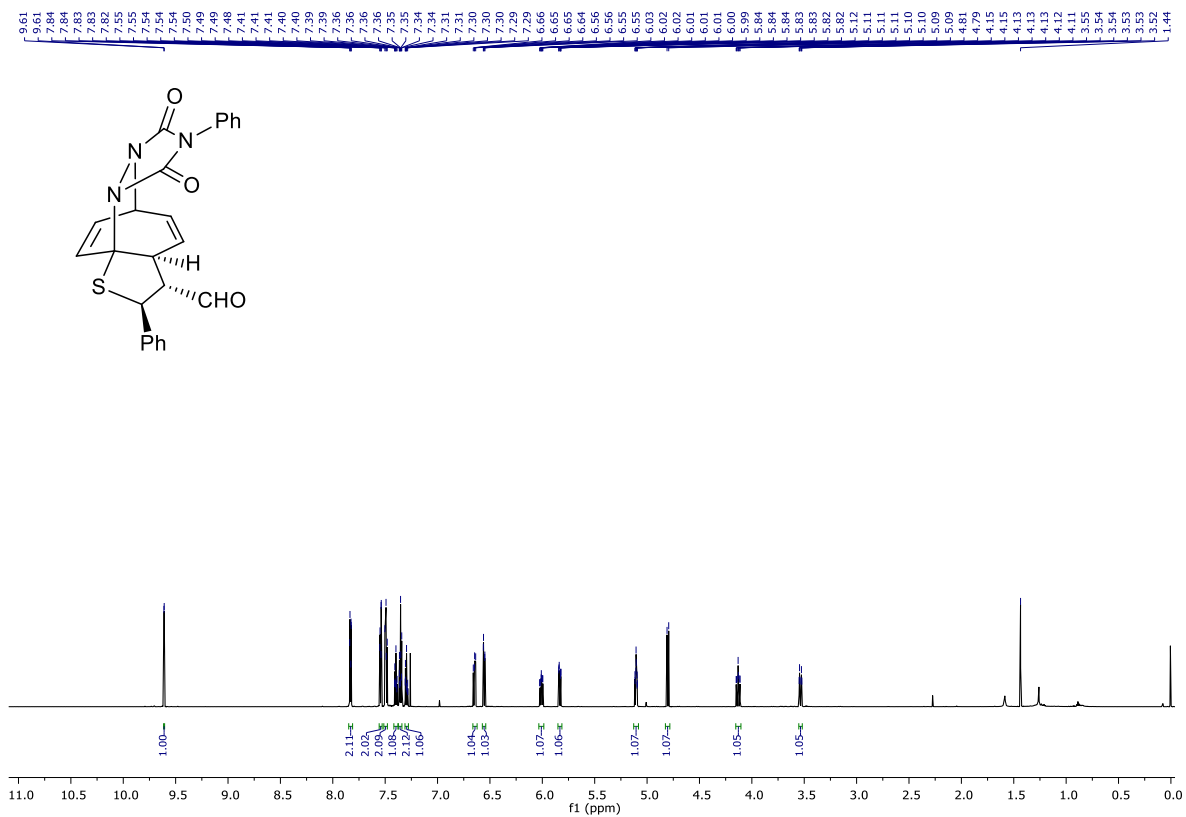

**<sup>13</sup>C NMR**

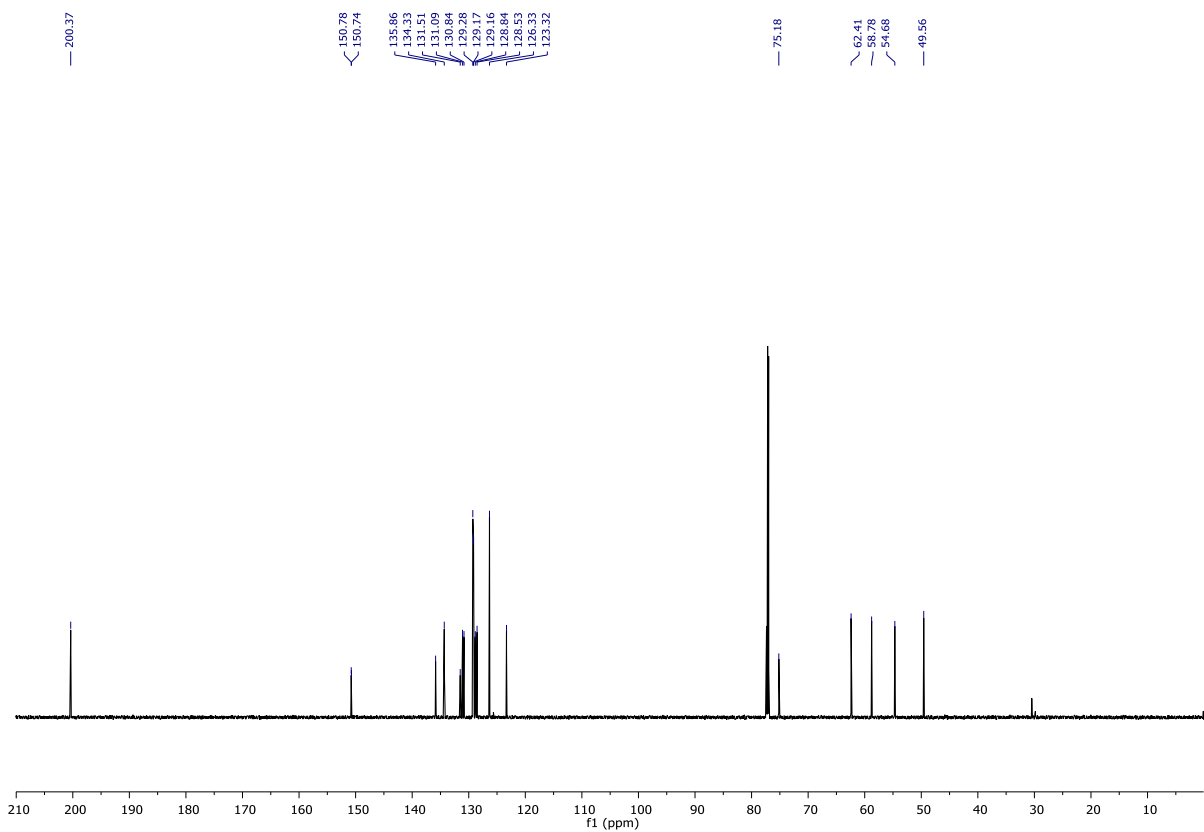

**(R)-2-Phenyl-2H-cyclohepta[b]thiophene-3-carbaldehyde 9**

**<sup>1</sup>H NMR**

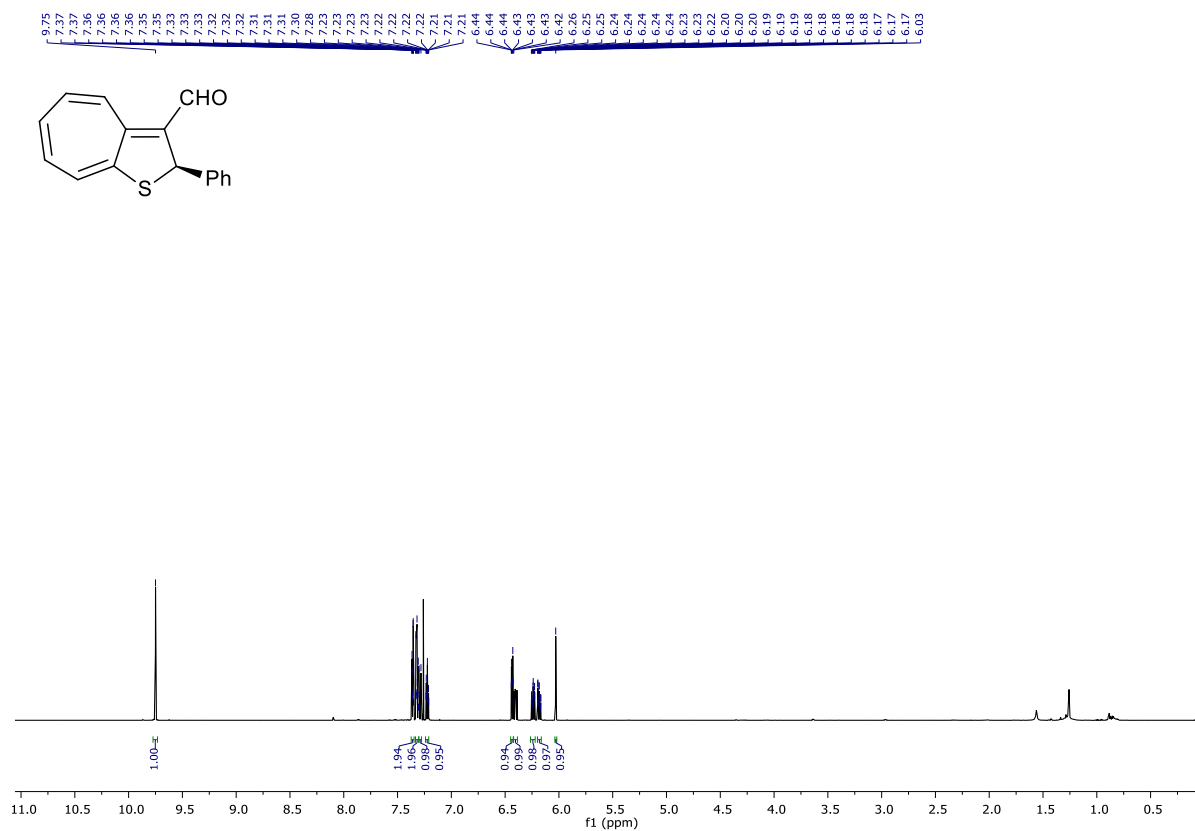

**<sup>13</sup>C NMR**

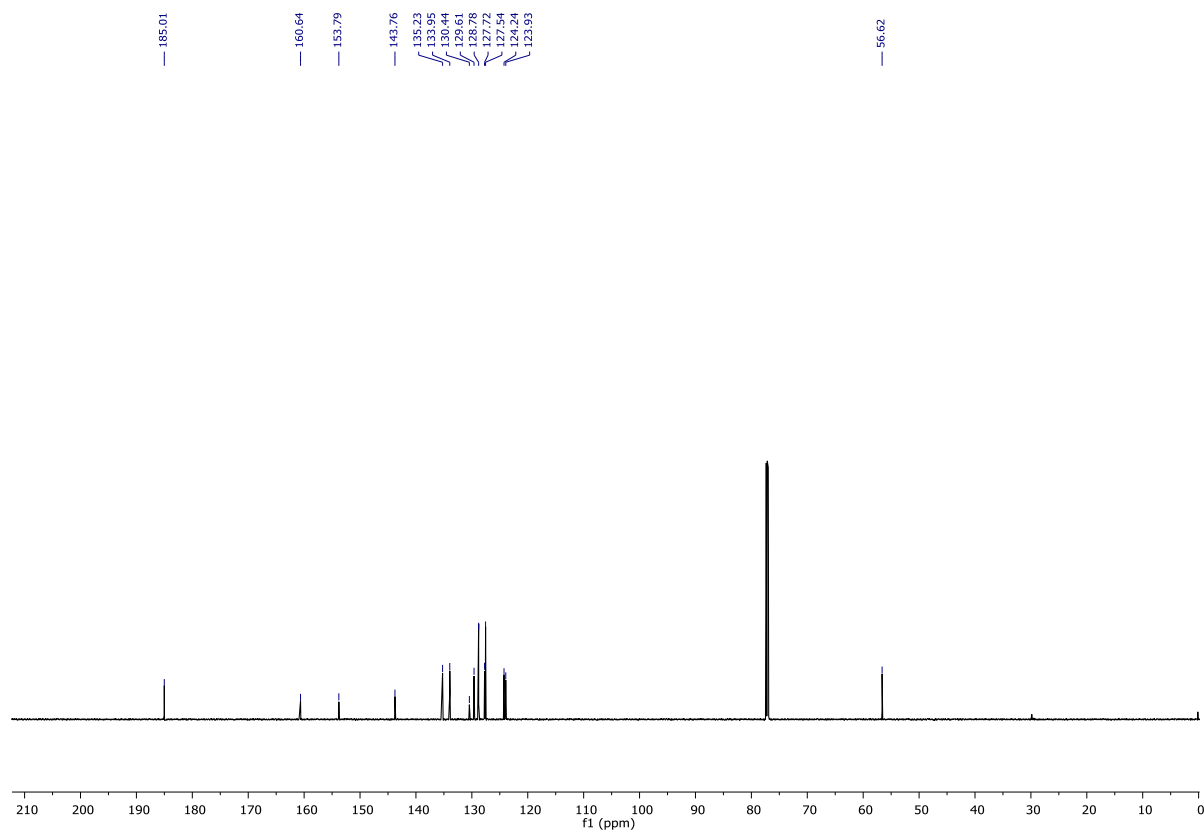

## 11. UPC<sup>2</sup> traces

### (2*S*,3*R*,3*a**S*)-2-Phenyl-3*a*-dihydro-2*H*-cyclohepta[*b*]thiophene-3-carbaldehyde **3a**

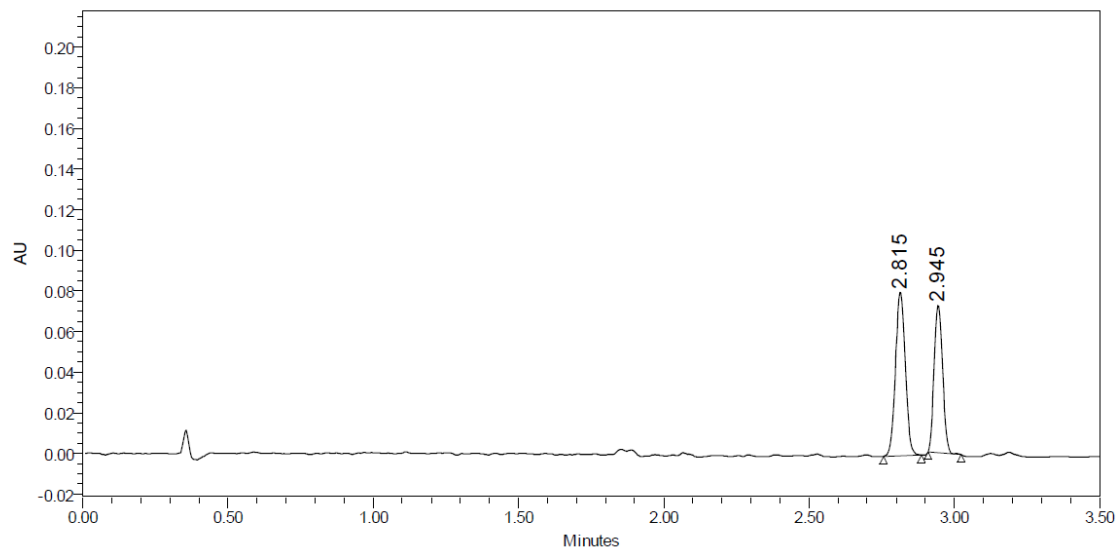

|   | RT    | Area   | % Area | Height |
|---|-------|--------|--------|--------|
| 1 | 2.815 | 187820 | 56.08  | 80507  |
| 2 | 2.945 | 147075 | 43.92  | 72573  |

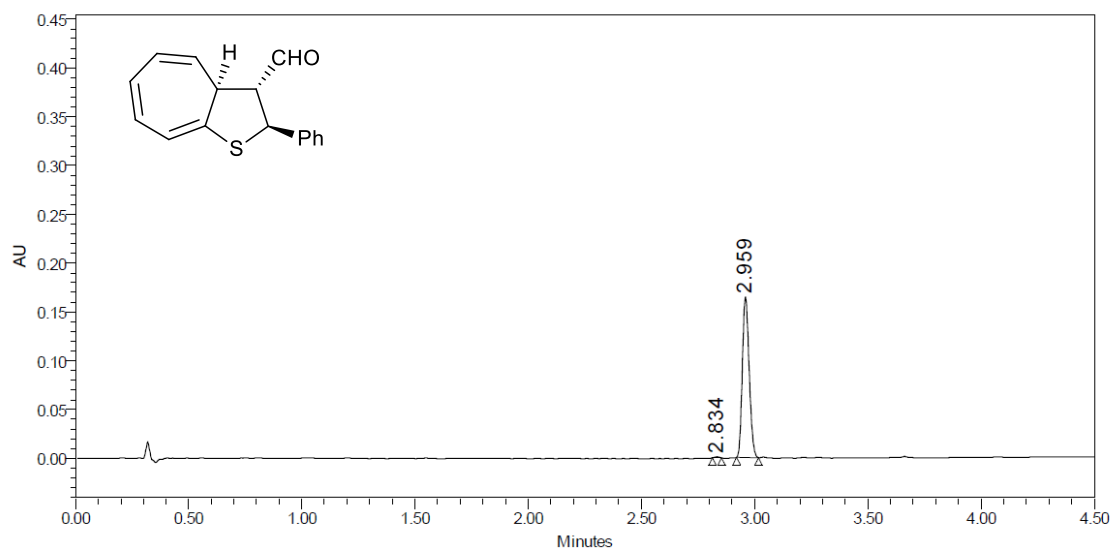

|   | RT    | Area   | % Area | Height |
|---|-------|--------|--------|--------|
| 1 | 2.834 | 1660   | 0.48   | 1145   |
| 2 | 2.959 | 343710 | 99.52  | 164630 |

**(2*S*,3*R*,3*aS*)-2-(*p*-Tolyl)-3,3*a*-dihydro-2*H*-cyclohepta[*b*]thiophene-3-carbaldehyde 3b**

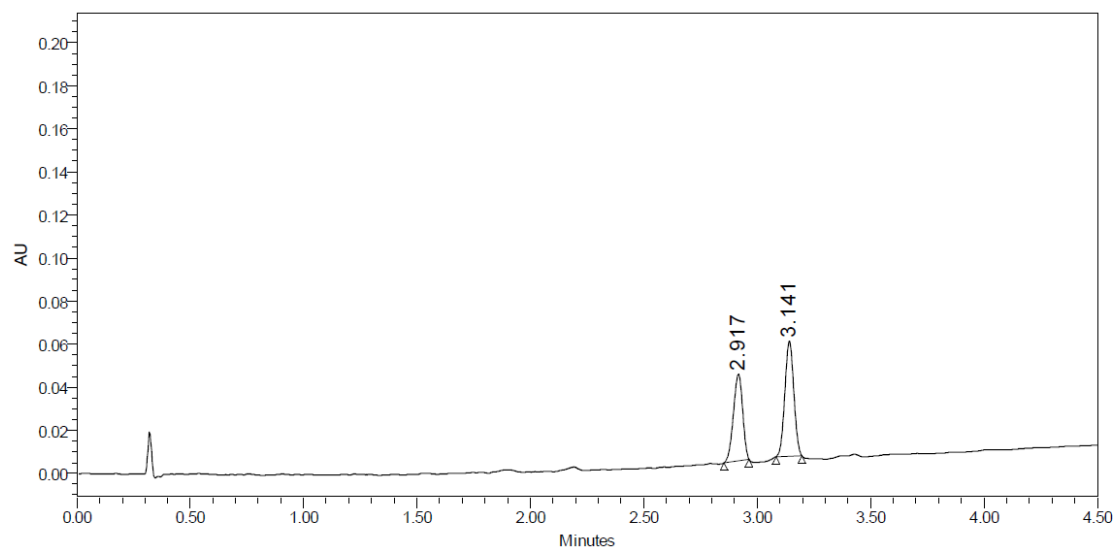

|   | RT    | Area   | % Area | Height |
|---|-------|--------|--------|--------|
| 1 | 2.917 | 113546 | 43.67  | 40139  |
| 2 | 3.141 | 146442 | 56.33  | 53585  |

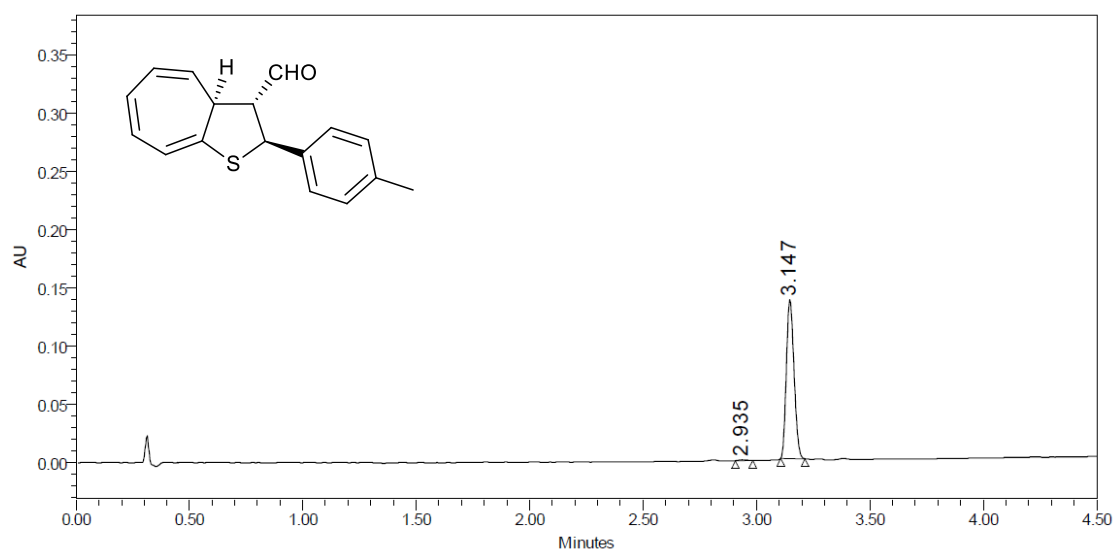

|   | RT    | Area   | % Area | Height |
|---|-------|--------|--------|--------|
| 1 | 2.935 | 1811   | 0.56   | 772    |
| 2 | 3.147 | 320220 | 99.44  | 136273 |

**(2*S*,3*R*,3*aS*)-2-(4-Methoxyphenyl)-3,3*a*-dihydro-2*H*-cyclohepta[*b*]thiophene-3-carbaldehyde 3c**

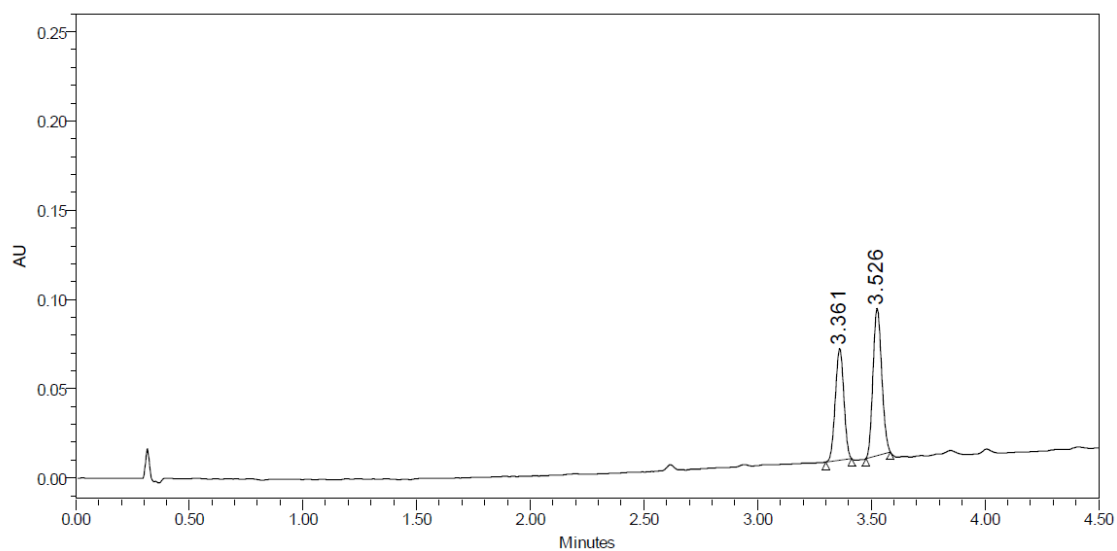

|   | RT    | Area   | % Area | Height |
|---|-------|--------|--------|--------|
| 1 | 3.361 | 163383 | 42.66  | 62558  |
| 2 | 3.526 | 219644 | 57.34  | 82435  |

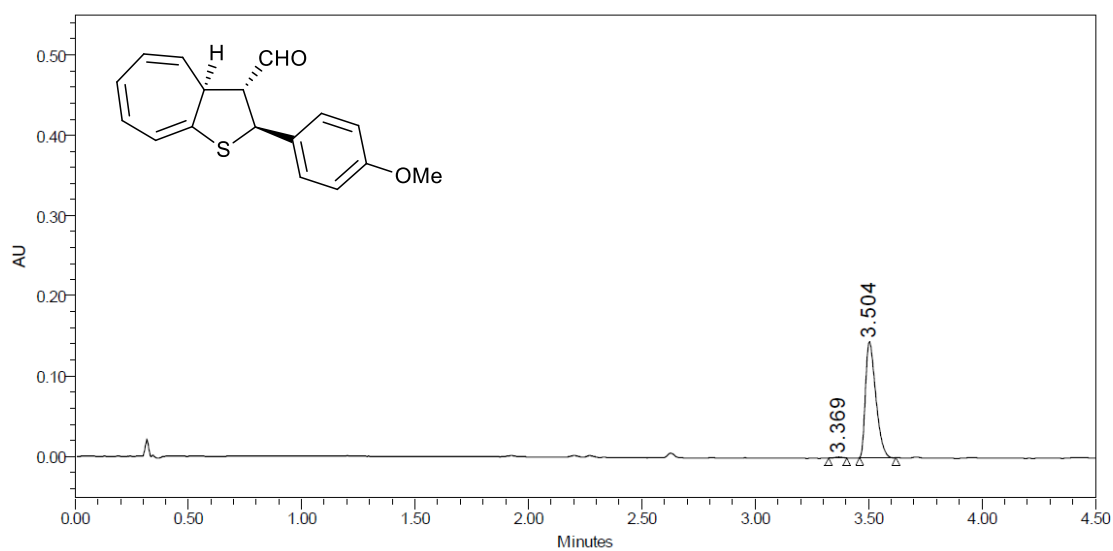

|   | RT    | Area   | % Area | Height |
|---|-------|--------|--------|--------|
| 1 | 3.369 | 3304   | 0.72   | 1495   |
| 2 | 3.504 | 455912 | 99.28  | 144578 |

**(2*S*,3*R*,3*aS*)-2-(4-Nitrophenyl)-3,3*a*-dihydro-2*H*-cyclohepta[*b*]thiophene-3-carbaldehyde 3d**

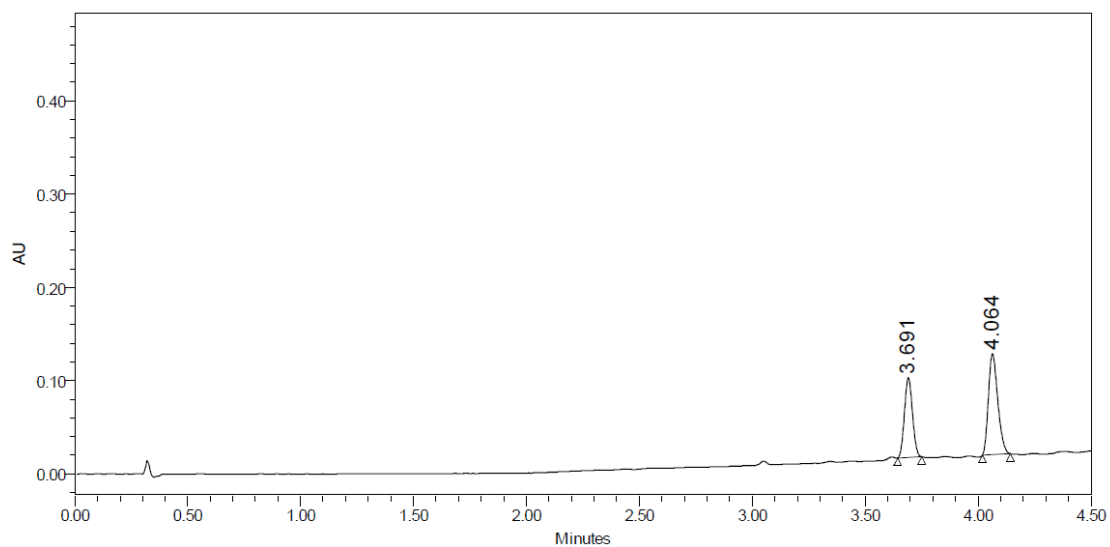

|   | RT    | Area   | % Area | Height |
|---|-------|--------|--------|--------|
| 1 | 3.691 | 211605 | 40.46  | 85663  |
| 2 | 4.064 | 311372 | 59.54  | 108205 |

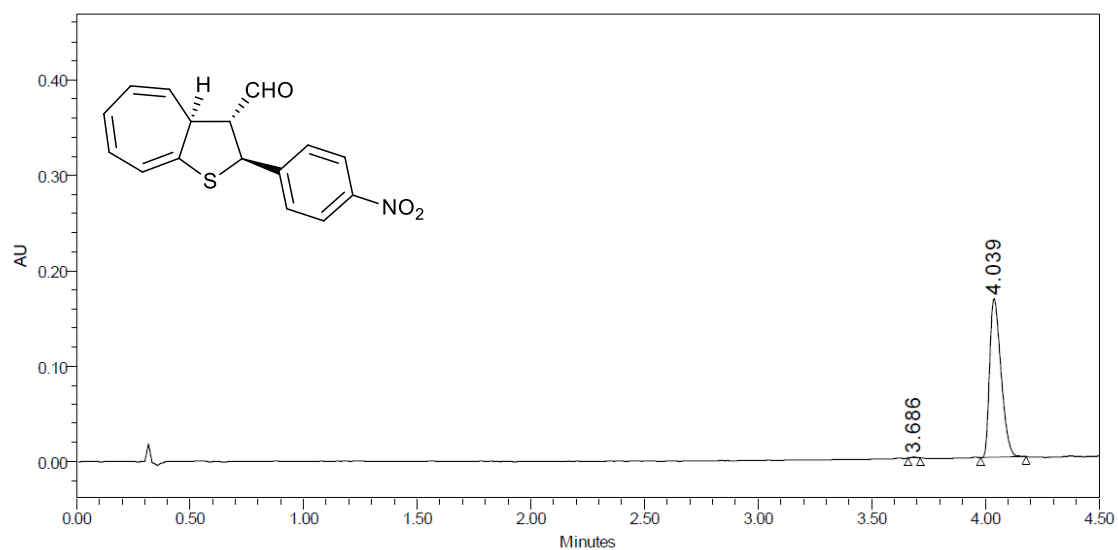

|   | RT    | Area   | % Area | Height |
|---|-------|--------|--------|--------|
| 1 | 3.686 | 2134   | 0.37   | 1105   |
| 2 | 4.039 | 578614 | 99.63  | 166339 |

**(2*S*,3*R*,3*aS*)-2-(4-Chlorophenyl)-3,3*a*-dihydro-2*H*-cyclohepta[*b*]thiophene-3-carbaldehyde**  
**3e**

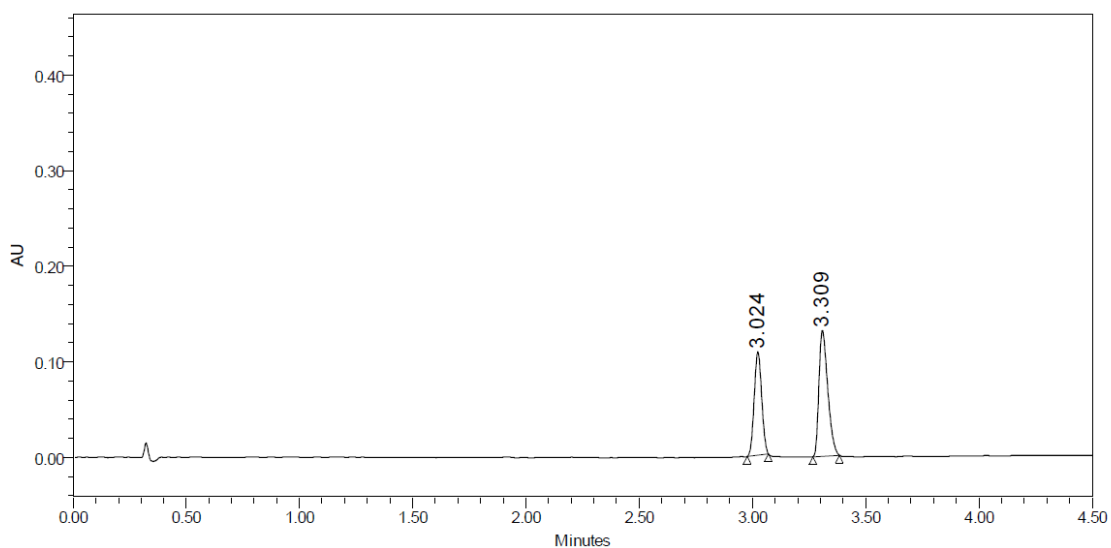

|   | RT    | Area   | % Area | Height |
|---|-------|--------|--------|--------|
| 1 | 3.024 | 246716 | 40.95  | 107902 |
| 2 | 3.309 | 355697 | 59.05  | 131648 |

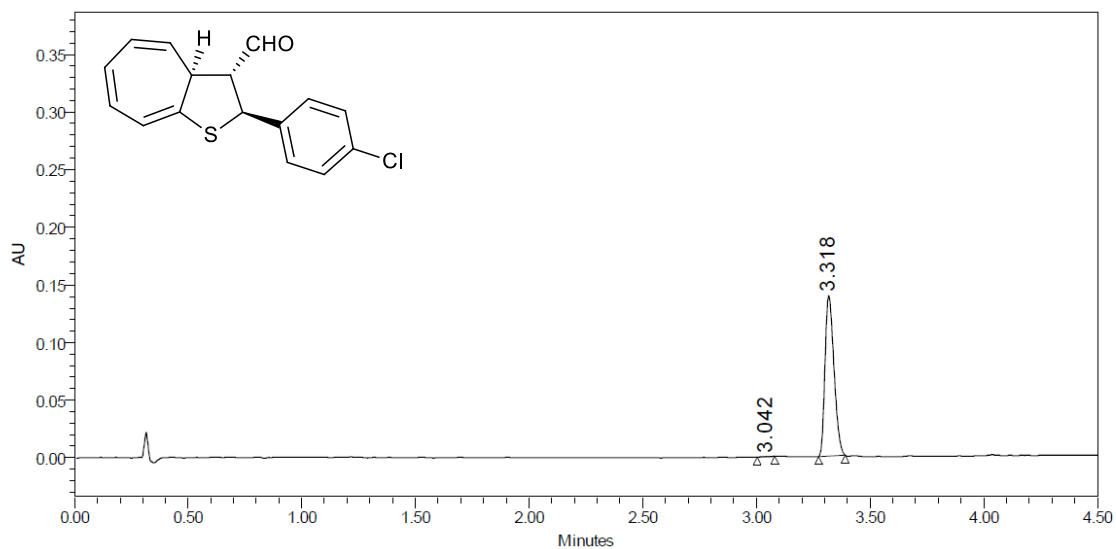

|   | RT    | Area   | % Area | Height |
|---|-------|--------|--------|--------|
| 1 | 3.042 | 488    | 0.13   | 265    |
| 2 | 3.318 | 381457 | 99.87  | 139616 |

**(2*S*,3*R*,3*aS*)-2-(3-Chlorophenyl)-3,3*a*-dihydro-2*H*-cyclohepta[*b*]thiophene-3-carbaldehyde**  
**3f**

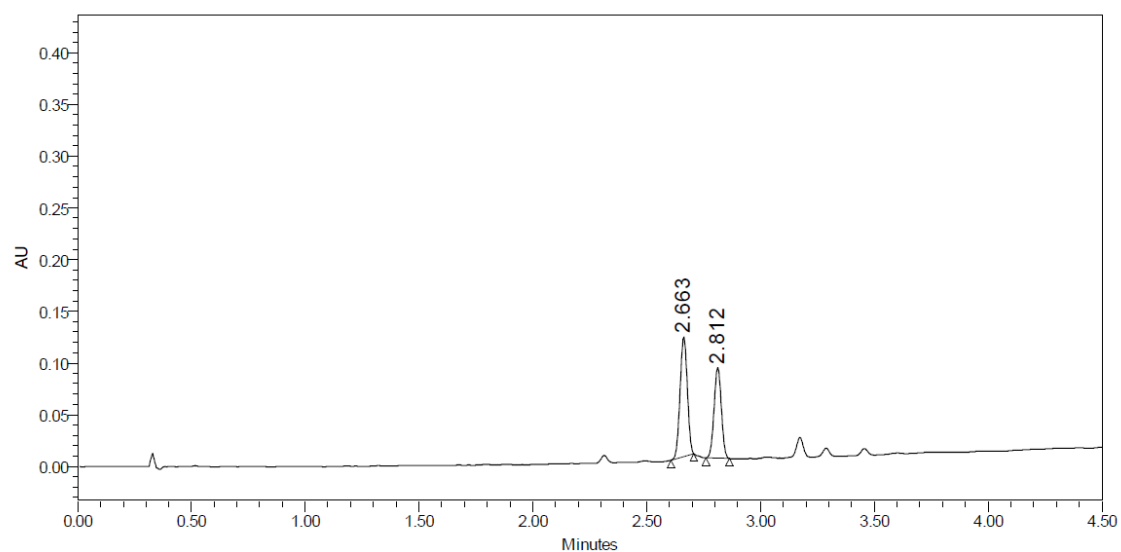

|   | RT    | Area   | % Area | Height |
|---|-------|--------|--------|--------|
| 1 | 2.663 | 255991 | 56.74  | 115585 |
| 2 | 2.812 | 195188 | 43.26  | 87838  |

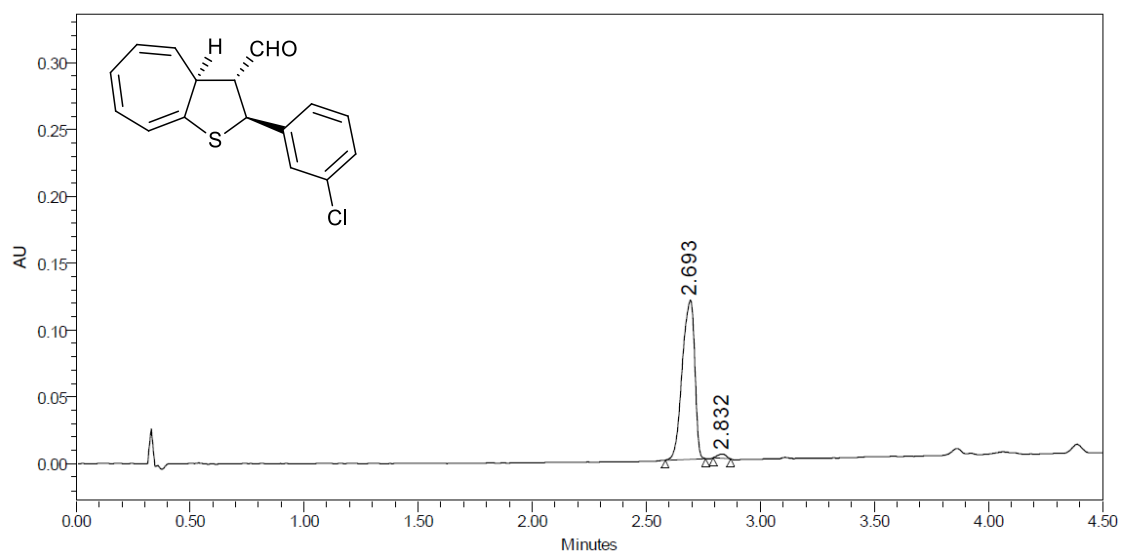

|   | RT    | Area   | % Area | Height |
|---|-------|--------|--------|--------|
| 1 | 2.693 | 450933 | 98.14  | 119026 |
| 2 | 2.832 | 8528   | 1.86   | 3326   |

**(2*S*,3*R*,3*aS*)-2-(2-Chlorophenyl)-3,3*a*-dihydro-2*H*-cyclohepta[*b*]thiophene-3-carbaldehyde**  
**3g**

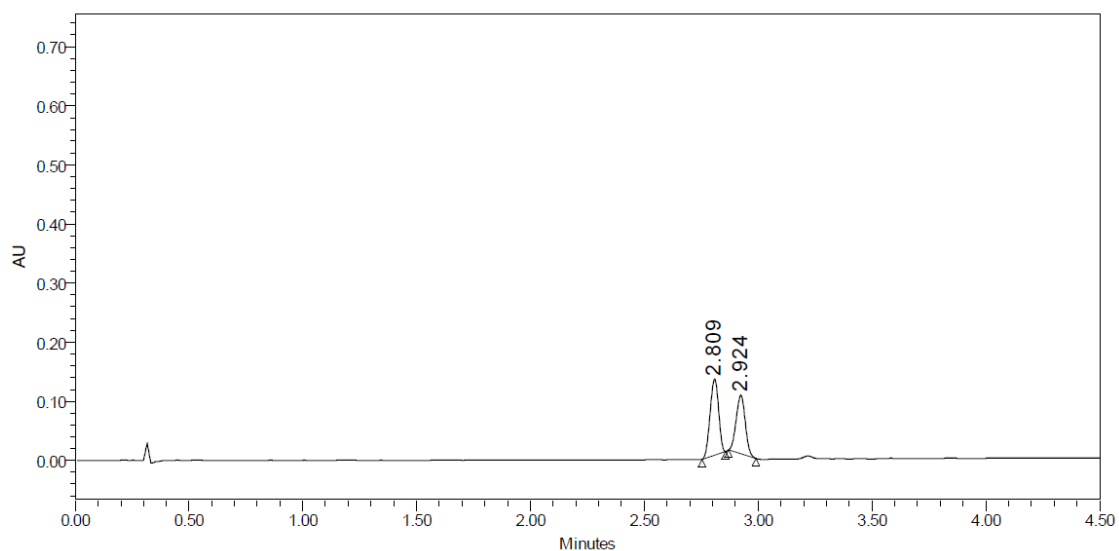

|   | RT    | Area   | % Area | Height |
|---|-------|--------|--------|--------|
| 1 | 2.809 | 333019 | 54.72  | 128942 |
| 2 | 2.924 | 275519 | 45.28  | 99036  |

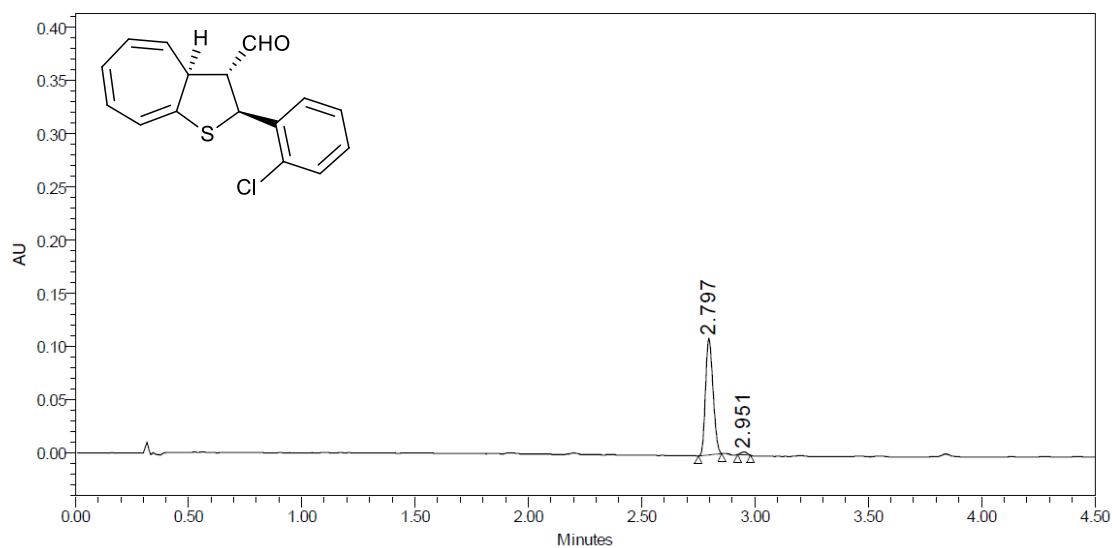

|   | RT    | Area   | % Area | Height |
|---|-------|--------|--------|--------|
| 1 | 2.797 | 251435 | 97.96  | 109038 |
| 2 | 2.951 | 5238   | 2.04   | 2833   |

**(2*S*,3*R*,3*aS*)-2-(Naphthalen-1-yl)-3,3*a*-dihydro-2*H*-cyclohepta[*b*]thiophene-3-carbaldehyde**  
**3h**

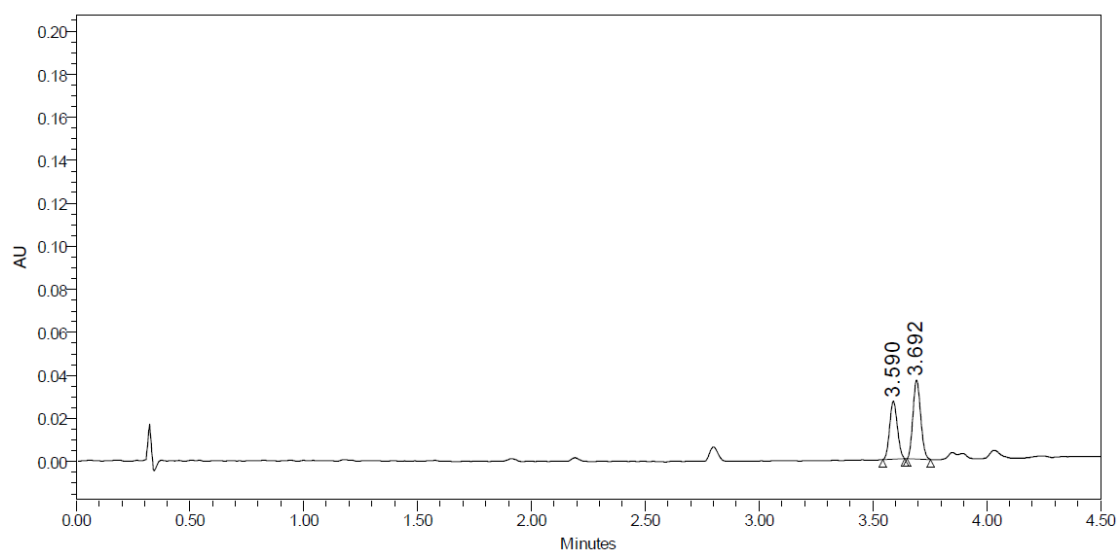

|   | RT    | Area  | % Area | Height |
|---|-------|-------|--------|--------|
| 1 | 3.590 | 63008 | 42.24  | 26858  |
| 2 | 3.692 | 86141 | 57.76  | 36676  |

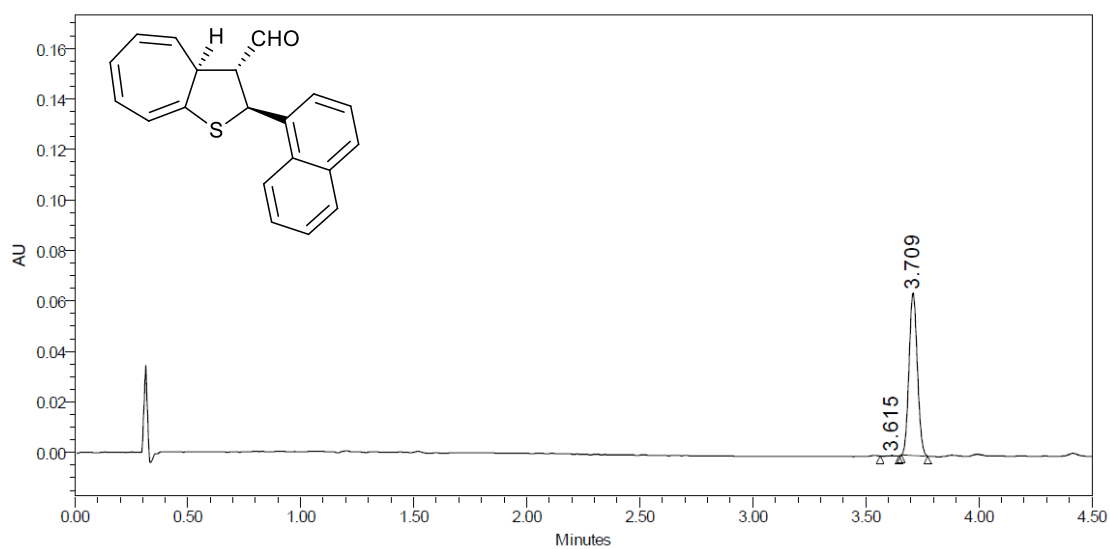

|   | RT    | Area   | % Area | Height |
|---|-------|--------|--------|--------|
| 1 | 3.615 | 283    | 0.17   | 120    |
| 2 | 3.709 | 164685 | 99.83  | 64424  |

**(2*S*,3*R*,3*aS*)-2-(Furan-2-yl)-3,3*a*-dihydro-2*H*-cyclohepta[*b*]thiophene-3-carbaldehyde 3i**

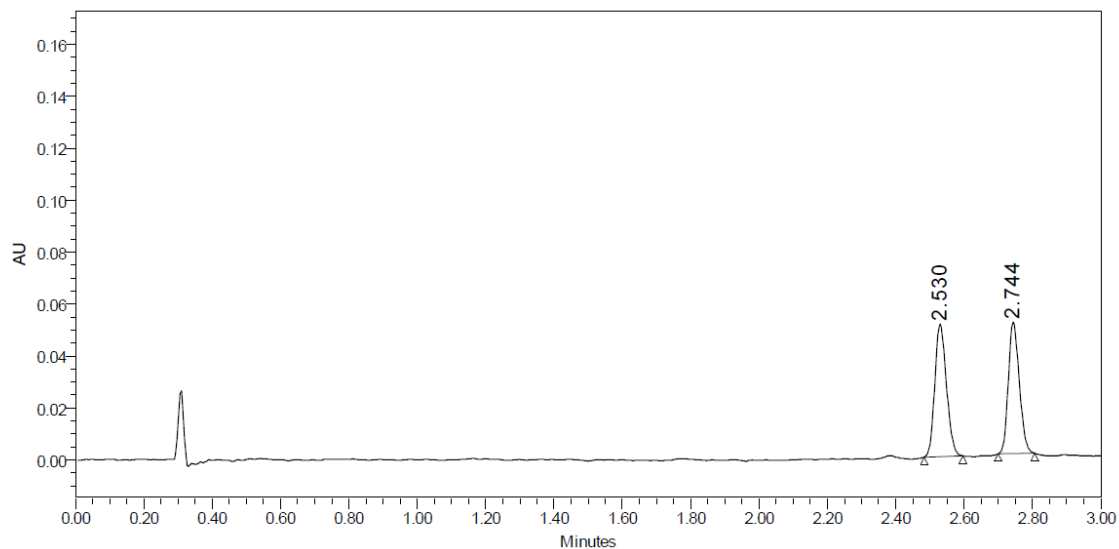

|   | RT    | Area   | % Area | Height |
|---|-------|--------|--------|--------|
| 1 | 2.530 | 120475 | 51.68  | 51066  |
| 2 | 2.744 | 112626 | 48.32  | 50701  |

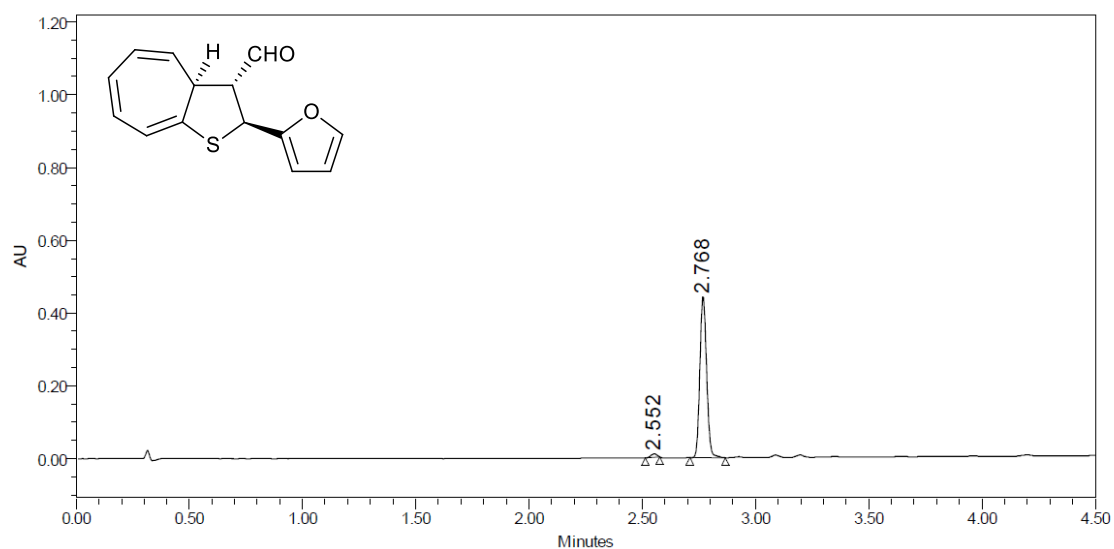

|   | RT    | Area   | % Area | Height |
|---|-------|--------|--------|--------|
| 1 | 2.552 | 17816  | 1.90   | 9715   |
| 2 | 2.768 | 917792 | 98.10  | 443659 |

**(2*R*,3*R*,3*aS*)-2-Propyl-3,3*a*-dihydro-2*H*-cyclohepta[*b*]thiophene-3-carbaldehyde 3j**

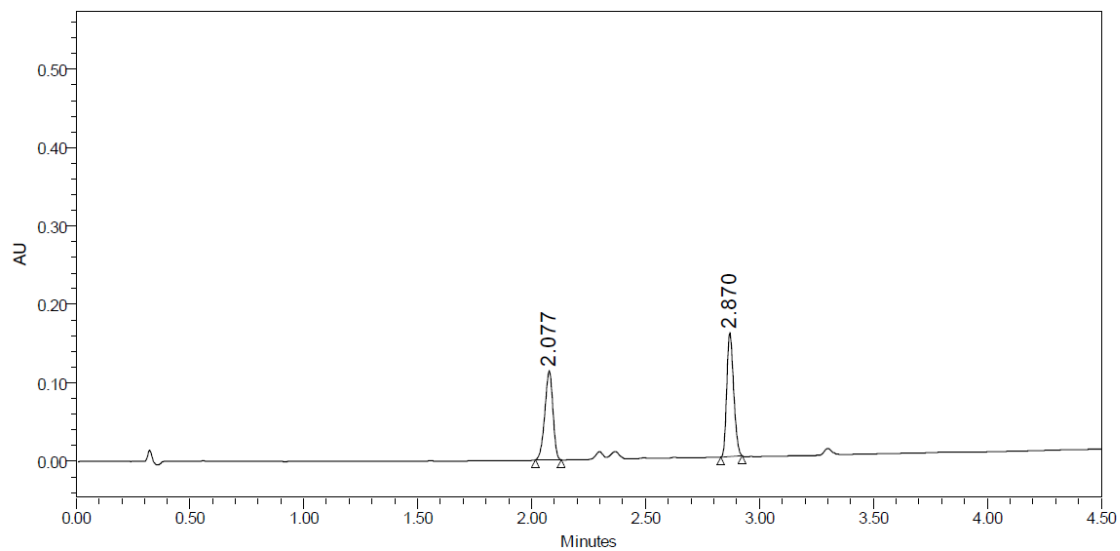

|   | RT    | Area   | % Area | Height |
|---|-------|--------|--------|--------|
| 1 | 2.077 | 279743 | 45.85  | 113451 |
| 2 | 2.870 | 330345 | 54.15  | 157890 |

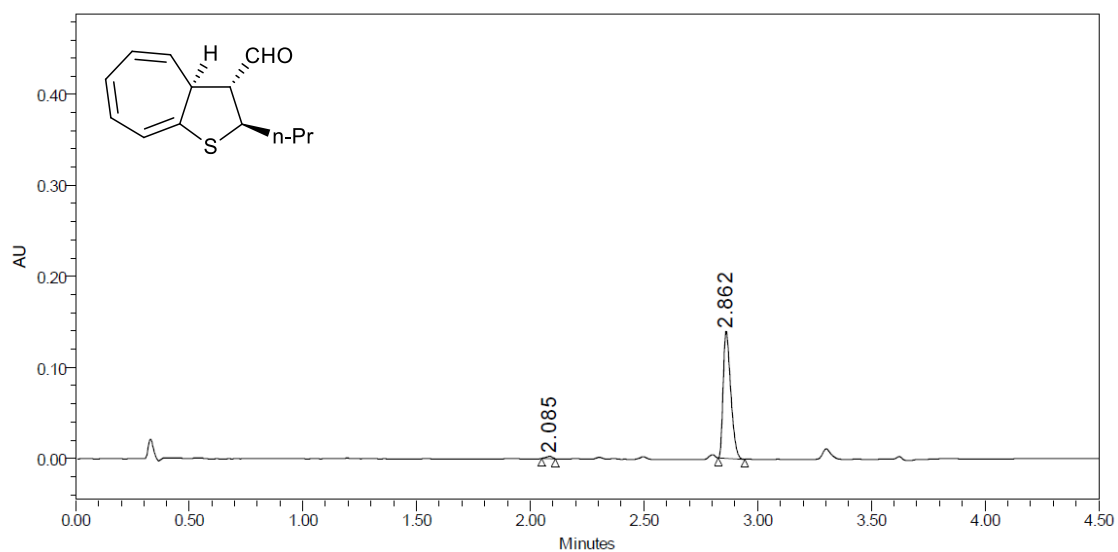

|   | RT    | Area   | % Area | Height |
|---|-------|--------|--------|--------|
| 1 | 2.085 | 4685   | 1.43   | 2399   |
| 2 | 2.862 | 322670 | 98.57  | 140151 |

**(2*R*,3*R*,3*aS*)-2-Hexyl-3,3*a*-dihydro-2*H*-cyclohepta[*b*]thiophene-3-carbaldehyde 3k**

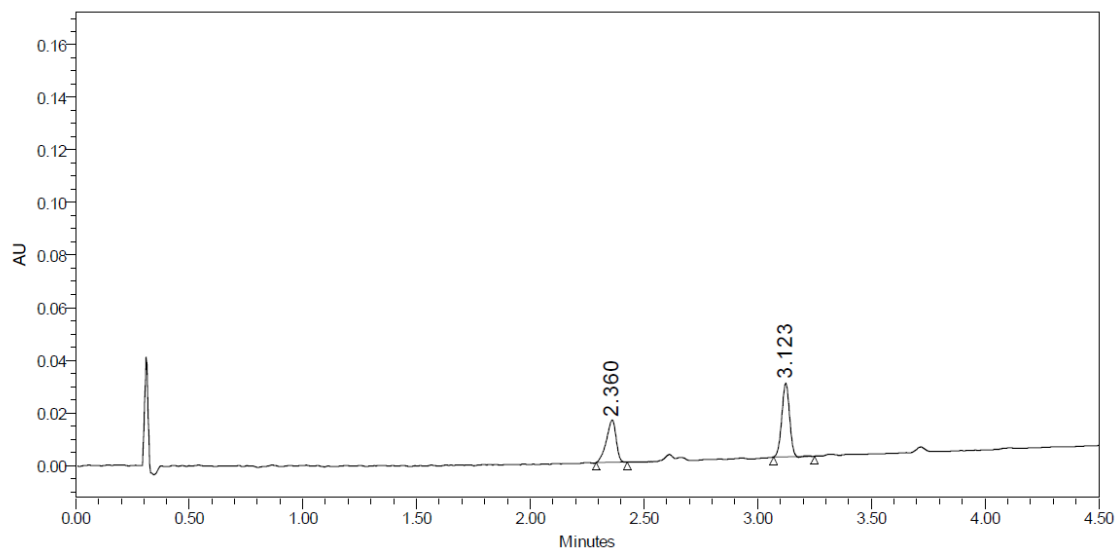

|   | RT    | Area  | % Area | Height |
|---|-------|-------|--------|--------|
| 1 | 2.360 | 47526 | 41.62  | 16087  |
| 2 | 3.123 | 66672 | 58.38  | 28099  |

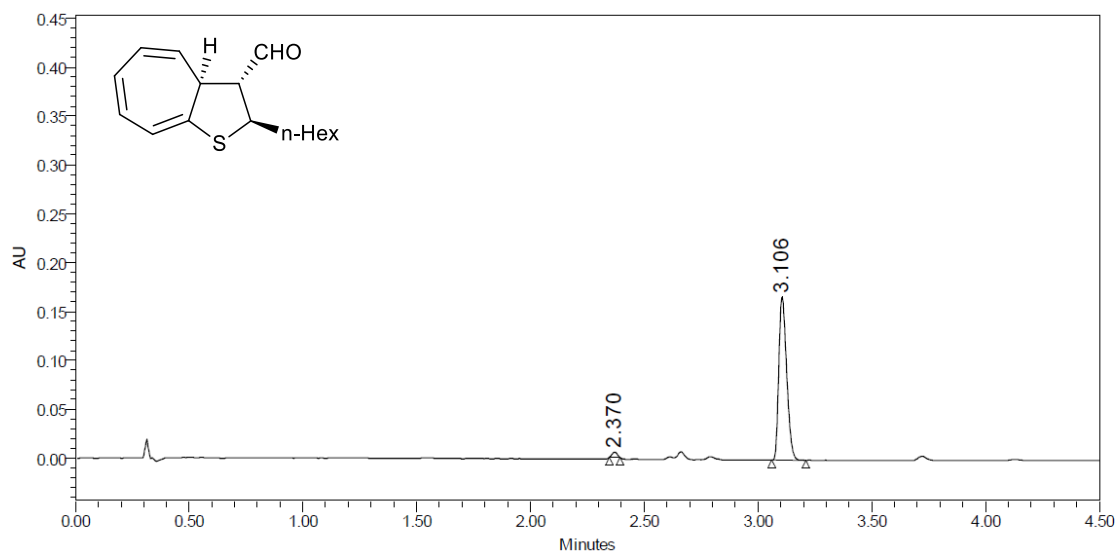

|   | RT    | Area   | % Area | Height |
|---|-------|--------|--------|--------|
| 1 | 2.370 | 8342   | 2.04   | 5266   |
| 2 | 3.106 | 399834 | 97.96  | 167040 |

**(2*S*,3*R*,3*aS*)-2-((Benzyloxy)methyl)-3,3*a*-dihydro-2*H*-cyclohepta[*b*]thiophene-3-carbaldehyde 3I**

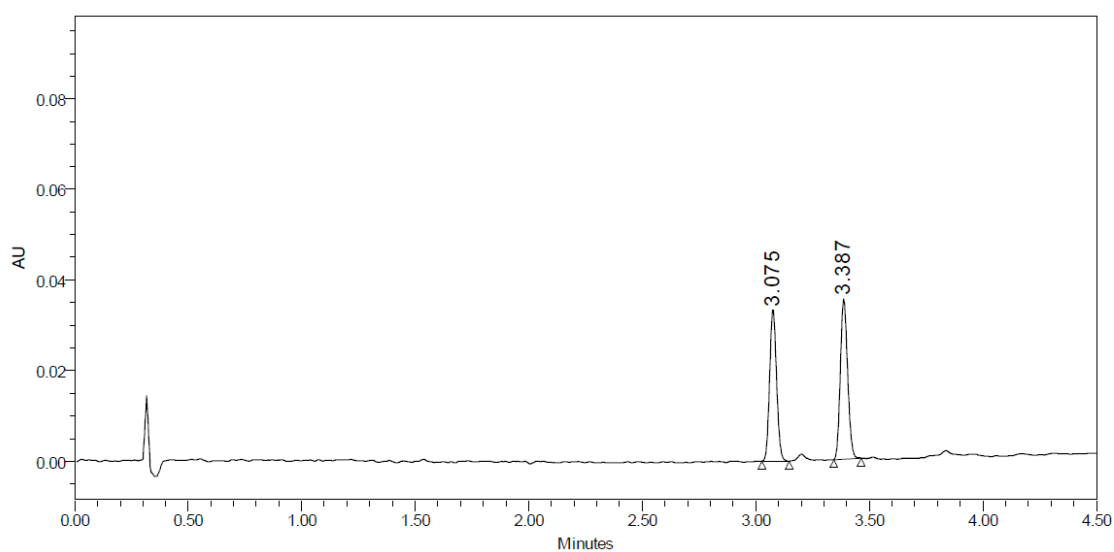

|   | RT    | Area  | % Area | Height |
|---|-------|-------|--------|--------|
| 1 | 3.075 | 71023 | 47.55  | 33469  |
| 2 | 3.387 | 78328 | 52.45  | 35253  |

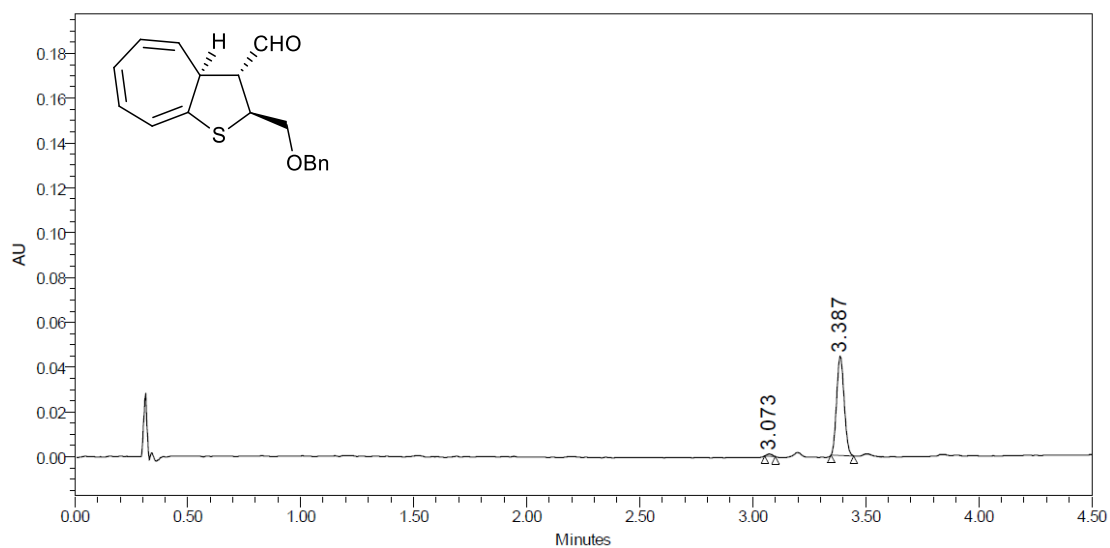

|   | RT    | Area   | % Area | Height |
|---|-------|--------|--------|--------|
| 1 | 3.073 | 1510   | 1.46   | 948    |
| 2 | 3.387 | 102126 | 98.54  | 44272  |

**(2*R*,3*R*,3*aS*)-2-((*Z*)-Hex-3-en-1-yl)-3,3*a*-dihydro-2*H*-cyclohepta[*b*]thiophene-3-carbaldehyde**  
**3m**

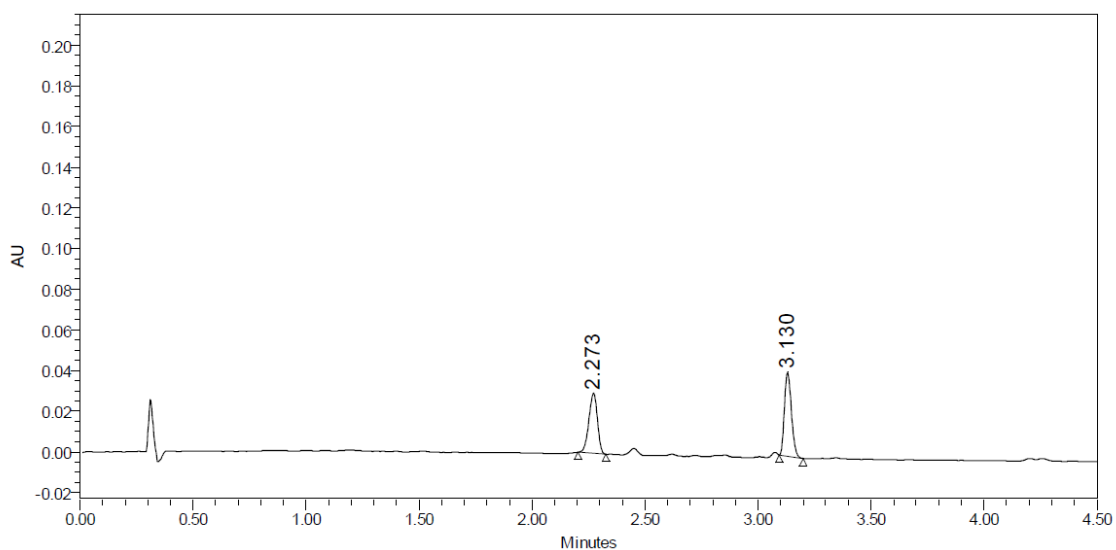

|   | RT    | Area  | % Area | Height |
|---|-------|-------|--------|--------|
| 1 | 2.273 | 77891 | 46.66  | 29615  |
| 2 | 3.130 | 89055 | 53.34  | 41056  |

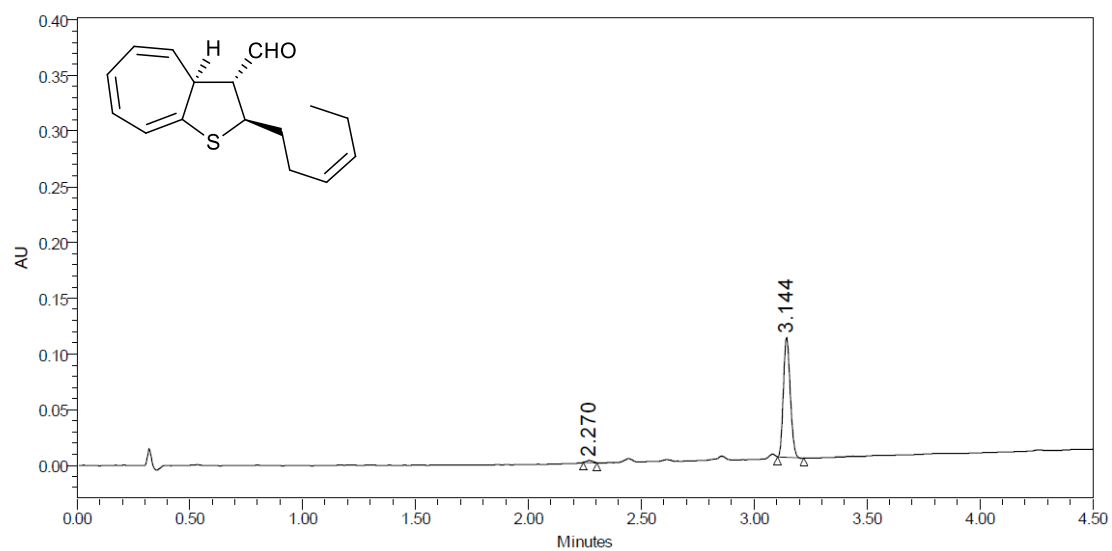

|   | RT    | Area   | % Area | Height |
|---|-------|--------|--------|--------|
| 1 | 2.270 | 3375   | 1.46   | 1743   |
| 2 | 3.144 | 227274 | 98.54  | 107749 |

**(2R,3R,3aS)-2-Methyl-2-(5-methylhex-4-en-1-yl)-3,3a-dihydro-2H-cyclohepta[b]thiophene-3-carbaldehyde 3n**

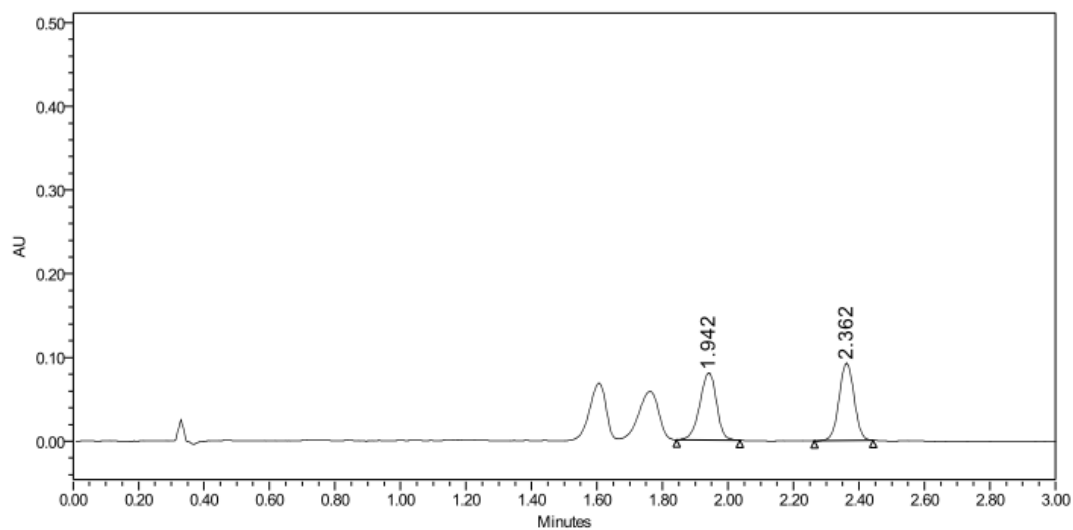

|   | RT    | Area   | % Area | Height |
|---|-------|--------|--------|--------|
| 1 | 1.942 | 284434 | 49.09  | 80059  |
| 2 | 2.362 | 294956 | 50.91  | 92322  |

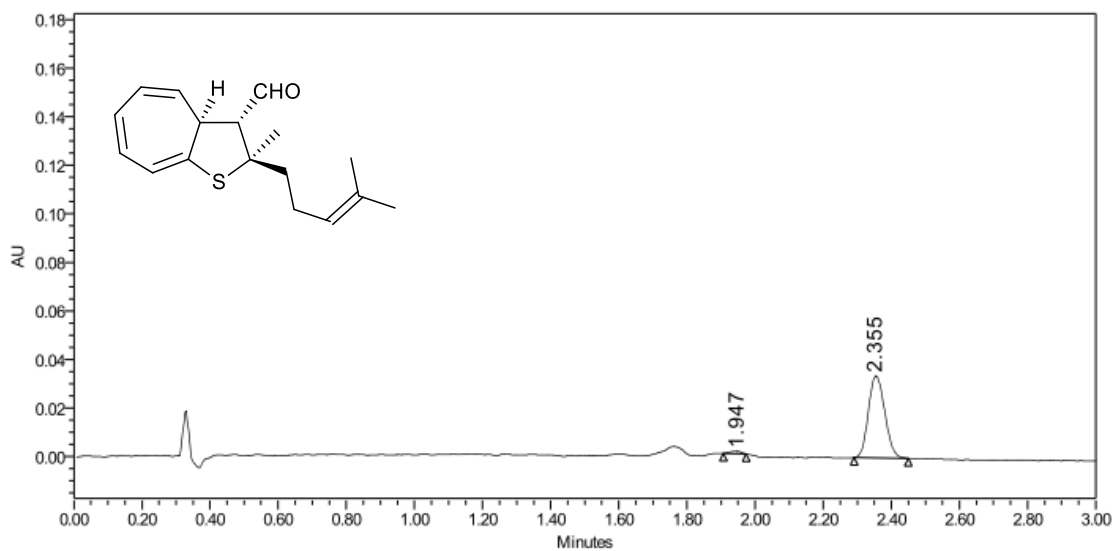

|   | RT    | Area   | % Area | Height |
|---|-------|--------|--------|--------|
| 1 | 1.947 | 2341   | 2.03   | 981    |
| 2 | 2.355 | 112889 | 97.97  | 33783  |

**(R)-2-Phenyl-2H-cyclohepta[b]thiophene-3-carbaldehyde 9**

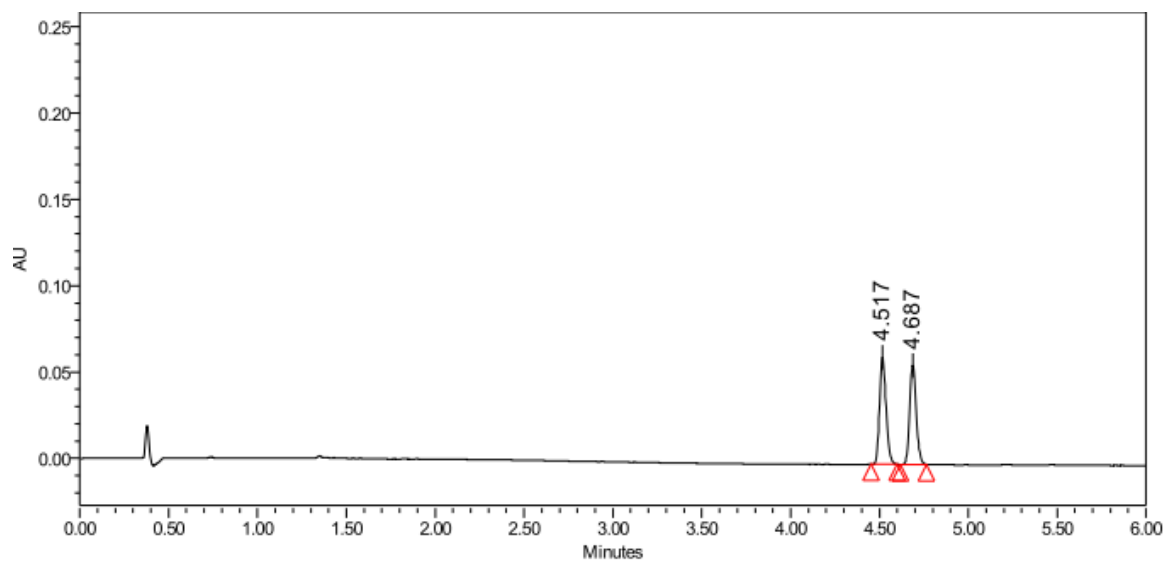

**Peak Results**

|   | RT    | % Area |
|---|-------|--------|
| 1 | 4.517 | 51.67  |
| 2 | 4.687 | 48.33  |

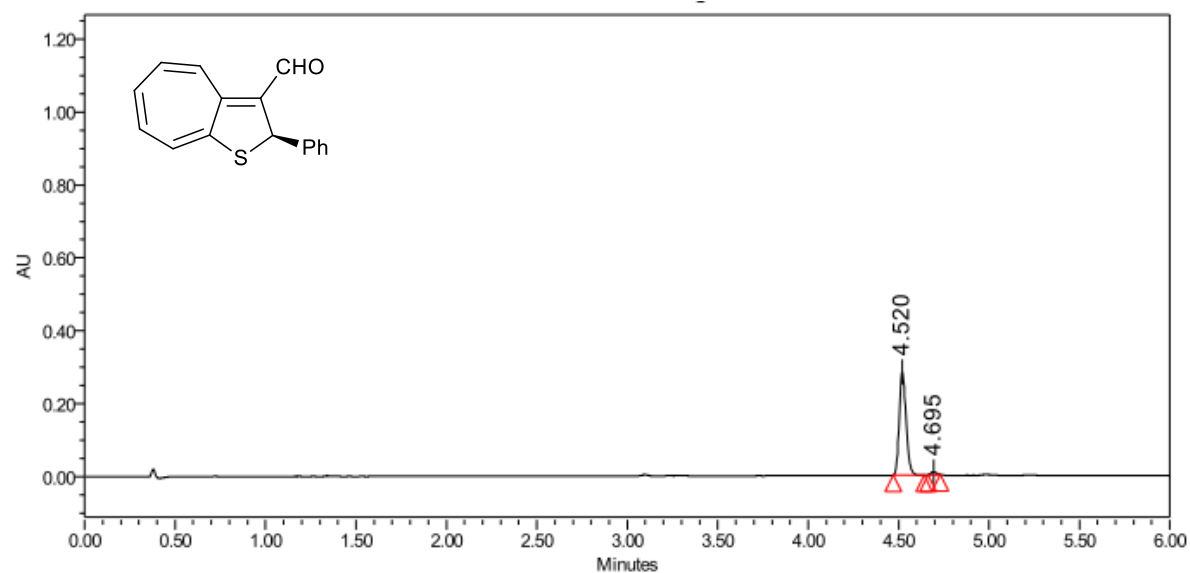

**Peak Results**

|   | RT    | % Area |
|---|-------|--------|
| 1 | 4.520 | 97.97  |
| 2 | 4.695 | 2.03   |
